# Supplementary material for: On the environmental competitiveness of sodium-ion batteries under a full life cycle perspective – a cell-chemistry specific modelling approach
Source: Royal Society of Chemistry journal article supplement (doi:10.1039/d1se01292d), 2021-01-01
Supplement: d1se01292d2.xlsx [file d1se01292d2.xlsx]

## Sheet: Cover
	SUPPLEMENTARY INFORMATION
	On the environmental competitiveness of Sodium-Ion batteries under a full life cycle perspective – A cell-chemistry specific modelling approach
	Jens F. Petersa,b*, Manuel Baumannc, Joachim Binderd, Marcel Weilc,e
	aUniversity of Alcalá (UAH), Department of Economics, Alcalá de Henares, Madrid, Spain
	bIMDEA Energy, Systems Analysis Unit, Móstoles, Madrid, Spain
	cInstitute for Technology Assessment and System Analysis (ITAS), Karlsruhe Institute of Technology (KIT), Germany.
	dInstitute for Applied Materials (IAM-ESS), Karlsruhe Institute of Technology (KIT), Germany.
	eHelmholtz Institute Ulm for Electrochemical Energy Storage (HIU), Ulm, Germany
	This spreadsheet contains all results tables and the underlying calculations for reproducing the Figures and Results presented in the main manuscript
	All data is published under CC-BY license and free for re-use, as long as the source is properly cited.

## Sheet: Production
	Na-Ion battery cell, prismatic, Na-NMC(111)-HC (2021)					re-calculated with updated LCU (19.07.)					Na-Ion battery cell, prismatic, NaMVP-HC (2021)										Na-Ion battery cell, prismatic, NaMMO-HC (2021)					re-calculated with updated LCI (19.07.)					Na-Ion battery cell, prismatic, NaNMMT (2021)					LCI unchanged (19.7.)					Na-Ion battery cell, prismatic, NaPBA-HC (2021)
	1161.45 g Na-Ion battery cell, prismatic, NMC-HC (2021)										1039.4 g Na-Ion battery cell, prismatic, NaMVP-HC (2021)										1007.7 g Na-Ion battery cell, prismatic, NaMMO-HC (2021)										921.64 kg Na-Ion battery cell, prismatic, NMMT-HC (2021)
	Impact analysis			Na-Ion battery cell, prismatic, Na-NMC(111)-HC (2021)							Impact analysis			Na-Ion battery cell, prismatic, NaMVP-HC (2021)							Impact analysis			Na-Ion battery cell, prismatic, NaMMO-HC (2021)							Impact analysis			Na-Ion battery cell, prismatic, NaNMMT (2021)							Impact analysis			Na-Ion battery cell, prismatic, NaPBA-HC (2021)
	Name	Category	Inventory result	Unit	Impact factor	Unit	Impact result	Unit			Name	Category	Inventory result	Unit	Impact factor	Unit	Impact result	Unit			Name	Category	Inventory result	Unit	Impact factor	Unit	Impact result	Unit			Name	Category	Inventory result	Unit	Impact factor	Unit	Impact result	Unit			Name	Category	Inventory result	Unit	Impact factor	Unit	Impact result	Unit
	Acidification						0.15678	molc H+ eq			Acidification						0.13554	molc H+ eq			Acidification						0.07892	molc H+ eq			Acidification						0.08394	molc H+ eq			Acidification						0.09139	molc H+ eq
	Climate change						13.7187	kg CO2 eq			Climate change						14.2074	kg CO2 eq			Climate change						8.28422	kg CO2 eq			Climate change						8.01709	kg CO2 eq			Climate change						13.878	kg CO2 eq
	Freshwater ecotoxicity						549.876	CTUe			Freshwater ecotoxicity						376.755	CTUe			Freshwater ecotoxicity						123.101	CTUe			Freshwater ecotoxicity						203.27	CTUe			Freshwater ecotoxicity						208.928	CTUe
	Freshwater eutrophication						0.00493	kg P eq			Freshwater eutrophication						0.00581	kg P eq			Freshwater eutrophication						0.00278	kg P eq			Freshwater eutrophication						0.0026	kg P eq			Freshwater eutrophication						0.00398	kg P eq
	Human toxicity, cancer effects						6.16316e-06	CTUh			Human toxicity, cancer effects						1.50774e-05	CTUh		1.46716e-05	Human toxicity, cancer effects						9.65025e-07	CTUh			Human toxicity, cancer effects						1.62113e-06	CTUh			Human toxicity, cancer effects						1.6302e-06	CTUh
	Human toxicity, non-cancer effects						1.21864e-05	CTUh			Human toxicity, non-cancer effects						1.25432e-05	CTUh		1.22752e-05	Human toxicity, non-cancer effects						1.78457e-06	CTUh			Human toxicity, non-cancer effects						3.04604e-06	CTUh			Human toxicity, non-cancer effects						2.6951e-06	CTUh
	Ionizing radiation E (interim)						2.5135e-05	CTUe			Ionizing radiation E (interim)						4.72612e-06	CTUe	2.76206e-05	2.69468e-05	Ionizing radiation E (interim)						3.55227e-06	CTUe			Ionizing radiation E (interim)						5.73509e-06	CTUe			Ionizing radiation E (interim)						4.45032e-06	CTUe
	Ionizing radiation HH						4.11443	kBq U235 eq			Ionizing radiation HH						1.43068	kBq U235 eq			Ionizing radiation HH						1.17758	kBq U235 eq			Ionizing radiation HH						1.32416	kBq U235 eq			Ionizing radiation HH						1.4781	kBq U235 eq
	Land use						15.0163	kg C deficit			Land use						18.4908	kg C deficit			Land use						9.26896	kg C deficit			Land use						11.3619	kg C deficit			Land use						12.2855	kg C deficit
	Marine eutrophication						0.02472	kg N eq			Marine eutrophication						0.02029	kg N eq			Marine eutrophication						0.01545	kg N eq			Marine eutrophication						0.01576	kg N eq			Marine eutrophication						0.01908	kg N eq
	Mineral, fossil & ren resource depletion						0.00573	kg Sb eq			Mineral, fossil & ren resource depletion						0.00124	kg Sb eq			Mineral, fossil & ren resource depletion						0.00084	kg Sb eq			Mineral, fossil & ren resource depletion						0.00144	kg Sb eq			Mineral, fossil & ren resource depletion						0.00128	kg Sb eq
	Ozone depletion						1.8274e-06	kg CFC-11 eq			Ozone depletion						1.23342e-06	kg CFC-11 eq			Ozone depletion						7.39456e-07	kg CFC-11 eq			Ozone depletion						7.37173e-07	kg CFC-11 eq			Ozone depletion						1.41684e-06	kg CFC-11 eq
	Particulate matter						0.01158	kg PM2.5 eq			Particulate matter						0.0106	kg PM2.5 eq			Particulate matter						0.00658	kg PM2.5 eq			Particulate matter						0.00562	kg PM2.5 eq			Particulate matter						0.00758	kg PM2.5 eq
	Photochemical ozone formation						0.05783	kg NMVOC eq			Photochemical ozone formation						0.05802	kg NMVOC eq			Photochemical ozone formation						0.03632	kg NMVOC eq			Photochemical ozone formation						0.03502	kg NMVOC eq			Photochemical ozone formation						0.04534	kg NMVOC eq
	Terrestrial eutrophication						0.22917	molc N eq			Terrestrial eutrophication						0.20654	molc N eq			Terrestrial eutrophication						0.16694	molc N eq			Terrestrial eutrophication						0.154	molc N eq			Terrestrial eutrophication						0.19186	molc N eq
	Water resource depletion						15.6833	m3 water eq			Water resource depletion						6.97262	m3 water eq			Water resource depletion						5.00015	m3 water eq			Water resource depletion						5.58113	m3 water eq			Water resource depletion						7.6298	m3 water eq
	energy density	136.31	152.467	157.08	171.91	124.1	272.115	197.419	Wh/kg
	capacity (Wh/cell)	158.318	158.474	158.291	158.443	159.43	158.468	157.997		capacity (Wh/cell)	158.318	158.474	158.291	158.443	159.43	158.468	157.997
		NaNMC	NaMVP	NaMMO	NaNMMT	NaPBA	LiNMC	LiFP		per cell	NaNMC	NaMVP	NaMMO	NaNMMT	NaPBA	LiNMC	LiFP
AP	Acidification	0.15678	0.13554	0.07892	0.08394	0.09139	0.07144	0.05301	molc H+ eq	AP	0.15678	0.13554	0.07892	0.08394	0.09139	0.07144	0.05301	molc H+ eq
GWP	Climate change	13.7187	14.2074	8.28422	8.01709	13.878	7.10008	7.83497	kg CO2 eq	GWP	13.7187	14.2074	8.28422	8.01709	13.878	7.10008	7.83497	kg CO2 eq
FWEcoTox	Freshwater ecotoxicity	549.876	376.755	123.101	203.27	208.928	969.276	1256.84	CTUe	Htox	0.0183496	0.0276206	0.0027496	0.00466717	0.0043253	0.0164886	0.0157769	mCTUh
FWEP	Freshwater eutrophication	0.00493	0.00581	0.00278	0.0026	0.00398	0.00541	0.01107	kg P eq	RDP	0.00573	0.00124	0.00084	0.00144	0.00128	0.00503	0.00486	kg Sb eq
Htox,c	Human toxicity, cancer effects	6.16316e-06	1.50774e-05	9.65025e-07	1.62113e-06	1.6302e-06	3.32929e-06	1.92396e-06	CTUh	ODP	1.8274e-06	1.23342e-06	7.39456e-07	7.37173e-07	1.41684e-06	7.8499e-07	6.17554e-07	kg CFC-11 eq
Htox,nc	Human toxicity, non-cancer effects	1.21864e-05	1.25432e-05	1.78457e-06	3.04604e-06	2.6951e-06	1.31593e-05	1.38529e-05	CTUh	PMF	0.01158	0.0106	0.00658	0.00562	0.00758	0.00646	0.00557	kg PM2.5 eq
MEP	Ionizing radiation E (interim)	2.5135e-05	4.72612e-06	3.55227e-06	5.73509e-06	4.45032e-06	1.16005e-05	2.77624e-06	CTUe
ADP	Ionizing radiation HH	4.11443	1.43068	1.17758	1.32416	1.4781	1.92503	0.86619	kBq U235 eq	per kWh	NaNMC	NaMVP	NaMMO	NaNMMT	NaPBA	LiNMC	LiFP
ODP	Land use	15.0163	18.4908	9.26896	11.3619	12.2855	1.84147	1.90522	kg C deficit	AP	0.990288	0.85528	0.498575	0.52978	0.57323	0.450816	0.335513	molc H+ eq
PMF	Marine eutrophication	0.02472	0.02029	0.01545	0.01576	0.01908	0.0099	0.00984	kg N eq	GWP	86.6528	89.6514	52.3354	50.5992	87.0473	44.8044	49.5894	kg CO2 eq
TEP	Mineral, fossil & ren resource depletion	0.00573	0.00124	0.00084	0.00144	0.00128	0.00503	0.00486	kg Sb eq	Htox	0.115904	0.174291	0.0173705	0.0294564	0.0271298	0.10405	0.0998554	mCTUh
	Ozone depletion	1.8274e-06	1.23342e-06	7.39456e-07	7.37173e-07	1.41684e-06	7.8499e-07	6.17554e-07	kg CFC-11 eq	RDP	0.0361931	0.00782461	0.00530668	0.00908844	0.0080286	0.0317414	0.0307601	kg Sb eq
	Particulate matter	0.01158	0.0106	0.00658	0.00562	0.00758	0.00646	0.00557	kg PM2.5 eq	ODP	1.15426e-05	7.78309e-06	4.67149e-06	4.6526e-06	8.88691e-06	4.95361e-06	3.90864e-06	kg CFC-11 eq
	Photochemical ozone formation	0.05783	0.05802	0.03632	0.03502	0.04534	0.02705	0.02767	kg NMVOC eq	PMF	0.0731441	0.0668878	0.041569	0.0354702	0.0475444	0.0407653	0.0352538	kg PM2.5 eq
	Terrestrial eutrophication	0.22917	0.20654	0.16694	0.154	0.19186	0.09109	0.10404	molc N eq
	Water resource depletion	15.6833	6.97262	5.00015	5.58113	7.6298	8.01798	4.95109	m3 water eq
	GWP			Na-Ion battery cell, prismatic, Na-NMC(111)-HC (2021)							GWP			Na-Ion battery cell, prismatic, NaMVP-HC (2021)							GWP			Na-Ion battery cell, prismatic, NaMMO-HC (2021)							GWP			Na-Ion battery cell, prismatic, NaNMMT (2021)							GWP			Na-Ion battery cell, prismatic, NaPBA-HC (2021)
	GWP										GWP										GWP										GWP										GWP
					Anode	Current coll	0.43858							Anode	Current coll	0.80498								Anode	Current coll	0.40666									Anode	Current coll	0.36198								Anode	Current coll	1.02855
						Act mat	0.31355								Act mat	0.21339									Act mat	0.31358										Act mat	0.27509									Act mat	0.27266
						Binder	0.07546								Binder	0.05135									Binder	0.07546										Binder	0.0662									Binder	0.06562
						other	0.08735								other	0.06084									other	0.08529										other	0.07484				cell recycling, dummy					other	0.07772
					Cathode	Current coll	0.41321							Cathode	Current coll	0.55975								Cathode	Current coll	0.38045									Cathode	Current coll	0.33809								Cathode	Current coll	0.9817
						Act mat	6.3073								Act mat	6.18455									Act mat	1.42973										Act mat	2.15937									Act mat	2.26516
						Binder	0.16038								Binder	0.14277									Binder	0.22639										Binder	0.11257									Binder	0.1404
						other	0.07994								other	0.07225									other	0.0747										other	0.05637									other	0.0731
					Electrolyte		0.82761							Electrolyte		0.82537								Electrolyte		0.79702									Electrolyte		0.70277								Electrolyte		1.274
					Separator		0.0483							Separator		0.06548								Separator		0.04419									Separator		0.03945								Separator		0.11555
					Housing		0.54548							Housing		0.54853								Housing		0.53169									Housing		0.48964								Housing (incl tabs)		0.73482
					Electricity		1.24682							Electricity		1.20835								Electricity		1.09068									Electricity		0.93681								Electricity		1.64026
					Heat		3.07396							Heat		3.37544								Heat		2.73565									Heat		2.32561								Heat		5.10919
					Others		0.10072							Others		0.0944								Others		0.09273									Others		0.0783								Others		0.09922
							158.318	158.474	158.291	158.443	159.43	158.468	157.997
							SIB					LIB
					per kWh	GWP	NaNMC	NaMVP	NaMMO	NaNMMT	NaPBA	LiNMC	LiFP				Na-NMC(111)	NMO-aqu	NMO	NMMT	NMC(111)	NMC(622)	LFP
					Anode	Foil	2.77026	5.07956	2.56906	2.28461	6.45142	1.70406	3.0962		Anode	Current coll	1.74981e-05	32.0529	16.23	14.4191	40.4655	10.7534	19.5966
						Act mat	1.98051	1.34653	1.98103	1.73621	1.71022	1.30682	1.48553			Act mat	12.5098	8.49681	12.5151	10.9579	10.7271	8.2466	9.4023
						Binder	0.476637	0.324027	0.476717	0.417816	0.411591	0.100336	0.114053			Binder	3.01064	2.04467	3.01165	2.63701	2.58164	0.633159	0.721867
						other	0.551739	0.383911	0.538817	0.472346	0.487487	0.147649	0.257347			other	3.48502	2.42254	3.40397	2.98117	3.05768	0.931728	1.62881
					Cathode	Foil	2.61001	3.53212	2.40348	2.13383	6.15756	1.56997	0.825332		Cathode	Current coll	16.4859	22.2883	15.1839	13.4675	38.6224	9.90715	5.22372
						Act mat	39.8396	39.0256	9.03228	13.6287	14.2079	20.2186	12.0645			Act mat	251.643	246.258	57.0612	86.0163	89.1166	127.588	76.3593
						Binder	1.01303	0.900903	1.43021	0.710476	0.880637	0.503823	0.692482			Binder	6.39871	5.68485	9.03534	4.48411	5.52366	3.17933	4.38288
						other	0.504935	0.45591	0.471915	0.355774	0.458508	0.252984	2.41701			other	3.18938	2.87687	2.98131	2.24544	2.87592	1.59644	15.2978
					Electrolyte		5.22753	5.20822	5.03515	4.43547	7.99097	1.99617	2.97018		Electrolyte		33.0193	32.8648	31.8095	27.9941	50.1221	12.5967	18.799
					Separator		0.305083	0.41319	0.279169	0.248985	0.724769	0.181109	0.336272		Separator		1.92703	2.6073	1.76364	1.57145	4.546	1.14287	2.12835
					Housing		3.44548	3.46132	3.35894	3.09032	4.60904	2.47677	3.20848		Housing		21.7631	21.8415	21.22	19.5043	28.9095	15.6295	20.3072
					Electricity		7.87544	7.62489	6.89034	5.9126	10.2883	3.85541	5.63815		Electricity		49.7446	48.1144	43.5296	37.3169	64.5316	24.3292	35.6851
					Heat		19.4164	21.2996	17.2824	14.6779	32.0466	9.98535	15.933		Heat		122.642	134.404	109.181	92.6383	201.007	63.0117	100.844
					Others		0.63619	0.59568	0.585819	0.494184	0.622342	0.505416	0.55077		Others		4.01844	3.75884	3.7009	3.119	3.90354	3.18938	3.48595
	ADP			Na-Ion battery cell, prismatic, Na-NMC(111)-HC (2021)							ADP			Na-Ion battery cell, prismatic, NaMVP-HC (2021)							ADP			Na-Ion battery cell, prismatic, NaMMO-HC (2021)							ADP			Na-Ion battery cell, prismatic, NaNMMT (2021)							ADP			Na-Ion battery cell, prismatic, NaPBA-HC (2021)
	ADP										ADP										ADP										ADP										ADP
					Anode	Current coll	4.70548e-06		Cathode act mat	0.00491				Anode	Current coll	8.59918e-06		Cathode act mat	8.19673e-06					Anode	Current coll	4.34419e-06		Cathode act mat	3.50651e-05						Anode	Current coll	3.86684e-06		Cathode act mat	0.00076					Anode	Current coll	1.09874e-05
						Act mat	1.26558e-05		Co	0.00376					Act mat	8.6132e-06		Co							Act mat	1.26572e-05		Co								Act mat	1.11035e-05		Co							Act mat	1.10053e-05
						Binder	1.01238e-06		Ni	0.00108					Binder	6.89e-07		Ni							Binder	1.01249e-06		Ni								Binder	8.88208e-07		Ni	0.00066						Binder	8.80351e-07
						other	2.23134e-06		Mn	2.2246e-05					other	1.66782e-06		Mn	2.24021e-06						other	2.22172e-06		Mn	1.4918e-05							other	1.95046e-06		Mn	1.02797e-07	cell recycling, dummy					other	2.13096e-06
					Cathode	Current coll	4.41204e-06		Li					Cathode	Current coll	5.97951e-06		Li						Cathode	Current coll	4.06416e-06		Li							Cathode	Current coll	3.61164e-06		Li						Cathode	Current coll	1.0487e-05
						Act mat	0.00491		Na	2.52923e-05					Act mat	0.00042		Na	5.42962e-08						Act mat	3.50651e-05		Na	7.37504e-06							Act mat	0.00076		Na	1.60395e-05						Act mat	6.47105e-05
						Binder	4.59879e-05		Fe						Binder	4.09368e-05		Fe							Binder	6.49164e-05		Fe								Binder	3.22788e-05		Fe							Binder	4.0259e-05
						other	-3.99939e-07		Other	2.24617e-05					other	3.08369e-06		Other	5.90222e-06						other	5.95434e-06		Other	1.27721e-05							other	1.96939e-06		Other	8.38577e-05						other	4.54348e-06
					Electrolyte		0.00068							Electrolyte		0.00068								Electrolyte		0.00065									Electrolyte		0.00058								Electrolyte		0.00105
					Separator		1.03502e-05							Separator		1.4033e-05								Separator		9.46945e-06									Separator		8.45405e-06								Separator		2.47623e-05
					Housing		6.88053e-06							Housing		6.9204e-06								Housing		6.7013e-06									Housing		6.15738e-06								Housing (incl tabs)		9.35822e-06
					Electricity		9.40478e-06							Electricity		9.11462e-06								Electricity		8.22706e-06									Electricity		7.06639e-06								Electricity		1.23726e-05
					Heat		1.04811e-05							Heat		1.1509e-05								Heat		9.32757e-06									Heat		7.92947e-06								Heat		1.74204e-05
					Others		3.22784e-05							Others		2.88538e-05								Others		2.6039e-05									Others		1.47239e-05								Others		2.10825e-05
							158.318	158.474	158.291	158.443	159.43	158.468	157.997
							SIB					LIB
					per kWh	ADP	NaNMC	NaMVP	NaMMO	NaNMMT	NaPBA	LiNMC	LiFP
					Anode	Foil	2.97218e-05	5.42623e-05	2.74443e-05	2.44052e-05	6.89167e-05	0.00835161	0.0151308
						Act mat	7.99393e-05	5.43507e-05	7.99615e-05	7.00788e-05	6.9029e-05	5.38223e-06	6.11824e-06
						Binder	6.39462e-06	4.34771e-06	6.39638e-06	5.60585e-06	5.52187e-06	1.34605e-06	1.53012e-06
						other	1.40941e-05	1.05242e-05	1.40356e-05	1.23101e-05	1.33661e-05	5.24886e-06	8.65962e-06
					Cathode	Foil	2.78683e-05	3.77317e-05	2.56752e-05	2.27945e-05	6.57782e-05	1.67714e-05	3.08826e-05
						Act mat	0.0310136	0.00265027	0.000221523	0.00479668	0.000405887	0.0165964	0.00651911
						Binder	0.000290479	0.000258318	0.000410108	0.000203725	0.000252518	0.000144468	0.000198555
						other	-2.52618e-06	1.94586e-05	3.76164e-05	1.24296e-05	2.84983e-05	8.84866e-06	1.23776e-05
					Electrolyte		0.00429517	0.00429091	0.00410636	0.00366062	0.00658596	0.00164071	0.0024684
					Separator		6.53762e-05	8.85506e-05	5.9823e-05	5.3357e-05	0.000155318	3.88055e-05	7.20609e-05
					Housing		4.34603e-05	4.36689e-05	4.23353e-05	3.88618e-05	5.8698e-05	0.00475272	0.0060391
					Electricity		5.94045e-05	5.75148e-05	5.19742e-05	4.45989e-05	7.76052e-05	2.90816e-05	4.25288e-05
					Heat		6.6203e-05	7.26237e-05	5.89267e-05	5.00462e-05	0.000109267	3.40463e-05	5.43257e-05
					Others		0.000203884	0.000182072	0.000164501	9.29285e-05	0.000132237	0.00011595	0.000175609
							0.0361931
				per kWh			NaNMC	NaMVP	NaMMO	NaNMMT	NaPBA	LiNMC	LiFP
				Anode	Foil		2.97218e-05	5.42623e-05	2.74443e-05	2.44052e-05	6.89167e-05	0.00835161	0.0151308
					Act mat		7.99393e-05	5.43507e-05	7.99615e-05	7.00788e-05	6.9029e-05	5.38223e-06	6.11824e-06
					Binder		6.39462e-06	4.34771e-06	6.39638e-06	5.60585e-06	5.52187e-06	1.34605e-06	1.53012e-06
					other		1.40941e-05	1.05242e-05	1.40356e-05	1.23101e-05	1.33661e-05	5.24886e-06	8.65962e-06
				Cathode	Foil		2.78683e-05	3.77317e-05	2.56752e-05	2.27945e-05	6.57782e-05	1.67714e-05	3.08826e-05
					Act mat	Co	0.0237497	0	0	0	0.000405887	0.0165964	0.00651911
						Ni	0.00682173	0	0	0.00416553
						Mn	0.000140515	1.41361e-05	9.42441e-05	6.48795e-07
						Li	0	0	0	0
						Na	0.000159757	3.42618e-07	4.65916e-05	0.000101232
						Fe	0	0	0	0
						Others	0.000141877	3.7244e-05	8.06872e-05	0.000529261
					Binder		0.000290479	0.000258318	0.000410108	0.000203725	0.000252518	0.000144468	0.000198555
					other		-2.52618e-06	1.94586e-05	3.76164e-05	1.24296e-05	2.84983e-05	8.84866e-06	1.23776e-05
				Electrolyte			0.00429517	0.00429091	0.00410636	0.00366062	0.00658596	0.00164071	0.0024684
				Separator			6.53762e-05	8.85506e-05	5.9823e-05	5.3357e-05	0.000155318	3.88055e-05	7.20609e-05
				Housing			4.34603e-05	4.36689e-05	4.23353e-05	3.88618e-05	5.8698e-05	0.00475272	0.0060391
				Electricity			5.94045e-05	5.75148e-05	5.19742e-05	4.45989e-05	7.76052e-05	2.90816e-05	4.25288e-05
				Heat			6.6203e-05	7.26237e-05	5.89267e-05	5.00462e-05	0.000109267	3.40463e-05	5.43257e-05
				Others			0.000203884	0.000182072	0.000164501	9.29285e-05	0.000132237	0.00011595	0.000175609
	AP			Na-Ion battery cell, prismatic, Na-NMC(111)-HC (2021)							AP			Na-Ion battery cell, prismatic, NaMVP-HC (2021)							AP			Na-Ion battery cell, prismatic, NaMMO-HC (2021)							AP			Na-Ion battery cell, prismatic, NaNMMT (2021)							AP			Na-Ion battery cell, prismatic, NaPBA-HC (2021)
	AP										AP										AP										AP										AP
					Anode	Current coll	0.00301							Anode	Current coll	0.00551								Anode	Current coll	0.00278432									Anode	Current coll	0.00247396								Anode	Current coll	0.00703
						Act mat	0.04144								Act mat	0.02821									Act mat	0.04145										Act mat	0.03636									Act mat	0.03604
						Binder	0.00029								Binder	0.0002									Binder	0.00029										Binder	0.00026									Binder	0.00025
						other	0.00048								other	0.00034									other	0.000465679										other	0.000416043									other	0.00045
					Cathode	Current coll	0.00282579							Cathode	Current coll	0.00383								Cathode	Current coll	0.00259824									Cathode	Current coll	0.00230842								Cathode	Current coll	0.00671
						Act mat	0.08677								Act mat	0.07542									Act mat	0.01077										Act mat	0.02446									Act mat	0.00978
						Binder	0.00067								Binder	0.0006									Binder	0.00095										Binder	0.00047									Binder	0.00059
						other	0.000504206								other	0.00045									other	0.000391759										other	0.000351584									other	0.00047
					Electrolyte		0.00631							Electrolyte		0.00629								Electrolyte		0.00607									Electrolyte		0.00535								Electrolyte		0.00971
					Separator		0.00022							Separator		0.0003								Separator		0.0002									Separator		0.00018								Separator		0.00053
					Housing		0.00359							Housing		0.00361								Housing		0.00349									Housing		0.00322								Housing		0.00482
					Electricity		1.55185e-05							Electricity		0.00622								Electricity		0.00561									Electricity		0.00482								Electricity		0.00844
					Heat		0.00351							Heat		0.00386								Heat		0.00313									Heat		0.00266								Heat		0.00584
					Others		0.00714448							Others		0.0007								Others		0.00072									Others		0.00061								Others		0.00073
							158.318	158.474	158.291	158.443	159.43	158.468	157.997
					per kWh	AP	Na-NMC(111)	NMO-aqu	NMO	NMMT	NMC(111)	NMC(622)	LFP
					Anode	Foil	0.0190124	0.034769	0.0175899	0.0156142	0.0440946	0.0376732	0.0684823
						Act mat	0.261752	0.17801	0.261859	0.229483	0.226055	0.00959183	0.0108863
						Binder	0.00183176	0.00126203	0.00183207	0.00164097	0.00156809	0.000387292	0.000440255
						other	0.00303188	0.00214546	0.00294191	0.00262582	0.00282256	0.0010641	0.00177498
					Cathode	Foil	0.0178489	0.0241679	0.0164143	0.0145694	0.0420874	0.0107132	0.0198105
						Act mat	0.548076	0.475913	0.0680392	0.154377	0.0613435	0.305676	0.114053
						Binder	0.004232	0.0037861	0.0060016	0.00296637	0.00370068	0.00214554	0.00291145
						other	0.00318478	0.00283958	0.00247493	0.00221899	0.002948	0.00159209	0.00221523
					Electrolyte		0.0398566	0.039691	0.0383471	0.0337661	0.0609045	0.0148295	0.0220257
					Separator		0.00138961	0.00189305	0.0012635	0.00113605	0.00332434	0.000820354	0.00151902
					Housing		0.0226759	0.0227797	0.022048	0.0203228	0.0302327	0.0312365	0.0399375
					Electricity		9.80214e-05	0.0392492	0.035441	0.030421	0.0529386	0.0198147	0.0290512
					Heat		0.0221706	0.0243572	0.0197737	0.0167884	0.0366305	0.0114218	0.0182282
					Others		0.0451275	0.00441712	0.00454858	0.00384996	0.00457881	0.00384935	0.00417729
	HTTP			Na-Ion battery cell, prismatic, Na-NMC(111)-HC (2021)							HTTP			Na-Ion battery cell, prismatic, NaMVP-HC (2021)							HTTP			Na-Ion battery cell, prismatic, NaMMO-HC (2021)							HTTP			Na-Ion battery cell, prismatic, NaNMMT (2021)							HTTP			Na-Ion battery cell, prismatic, NaPBA-HC (2021)
																																0.0004				transport, freight, lorry 16-32 metric ton, EURO5 | transport, freight, lorry 16-32 metric ton, EURO5 | Cutoff, U - RER	5.87973e-10	CTUh
					HTP-c									HTP-c										HTP-c											HTP-c										HTP-c
					Anode	Current coll	1.29805e-07							Anode	Current coll	2.37218e-07								Anode	Current coll	1.19839e-07									Anode	Current coll	1.06671e-07								Anode	Current coll	3.03098e-07
						Act mat	3.78945e-08								Act mat	2.579e-08									Act mat	3.78988e-08										Act mat	3.32466e-08									Act mat	3.29525e-08
						Binder	5.03925e-09								Binder	3.42959e-09									Binder	5.03983e-09										Binder	4.42117e-09									Binder	4.38206e-09
						other	1.61801e-08								other	1.21178e-08									other	1.61084e-08										other	1.41423e-08									other	1.54826e-08
					Cathode	Current coll	1.21711e-07							Cathode	Current coll	1.64951e-07								Cathode	Current coll	1.12114e-07									Cathode	Current coll	9.96307e-08								Cathode	Current coll	2.96933e-07
						Act mat	5.29712e-06								Act mat	1.40764e-05									Act mat	1.53286e-07										Act mat	9.04251e-07									Act mat	2.27193e-07
						Binder	1.03063e-08								Binder	9.17431e-09									Binder	1.45484e-08										Binder	7.23397e-09									Binder	9.0224e-09
						other	1.68529e-08								other	1.53751e-08									other	1.28386e-08										other	1.19044e-08									other	8.4401e-09
					Electrolyte		9.97952e-08							Electrolyte		9.95252e-08								Electrolyte		9.61076e-08									Electrolyte		8.47422e-08								Electrolyte		1.53622e-07
					Separator		3.8659e-09							Separator		5.24147e-09								Separator		3.53693e-09									Separator		3.15767e-09								Separator		9.24894e-09
					Housing (incl tabs)		1.46078e-07							Housing (incl tabs)		1.48816e-07								Housing (incl tabs)		1.44148e-07									Housing (incl tabs)		1.33088e-07								Housing (incl tabs)		1.98288e-07
					Electricity		1.2311e-07							Electricity		1.19312e-07								Electricity		1.07693e-07									Electricity		9.25e-08								Electricity		1.61958e-07
					Heat		8.57256e-08							Heat		9.41334e-08								Heat		7.62911e-08									Heat		6.48559e-08								Heat		1.42484e-07
					Others		6.96761e-08							Others		6.59171e-08								Others		6.55754e-08									Others		6.12853e-08								Others		6.70952e-08
																																0.0005				transport, freight, lorry 16-32 metric ton, EURO5 | transport, freight, lorry 16-32 metric ton, EURO5 | Cutoff, U - RER	1.54632e-09	CTUh
					HTP-nc									HTP-nc										HTP-nc											HTP-nc										HTP-nc
					Anode	Current coll	1.35574e-07							Anode	Current coll	2.47761e-07								Anode	Current coll	1.25166e-07									Anode	Current coll	1.11412e-07								Anode	Current coll	3.16569e-07
						Act mat	7.2389e-08								Act mat	4.92662e-08									Act mat	7.23973e-08										Act mat	6.35103e-08									Act mat	6.29485e-08
						Binder	1.16076e-08								Binder	7.89985e-09									Binder	1.16089e-08										Binder	1.01839e-08									Binder	1.00938e-08
						other	1.3678e-08								other	1.0243e-08									other	1.36161e-08										other	1.1955e-08									other	1.30886e-08
					Cathode	Current coll	1.2712e-07							Cathode	Current coll	1.72283e-07								Cathode	Current coll	1.17097e-07									Cathode	Current coll	1.04059e-07								Cathode	Current coll	3.02153e-07
						Act mat	1.07097e-05								Act mat	1.09442e-05									Act mat	1.09079e-07										Act mat	1.82906e-06									Act mat	4.64092e-07
						Binder	3.34428e-08								Binder	2.97696e-08									Binder	4.72078e-08										Binder	2.34734e-08									Binder	2.92767e-08
						other	1.58374e-08								other	1.44478e-08									other	2.97148e-07										other	1.12077e-08									other	1.49732e-08
					Electrolyte		2.99577e-07							Electrolyte		2.98767e-07								Electrolyte		2.88507e-07									Electrolyte		2.54389e-07								Electrolyte		4.61161e-07
					Separator		1.14972e-08							Separator		1.55881e-08								Separator		1.05188e-08									Separator		9.39087e-09								Separator		2.75063e-08
					Housing (incl tabs)		1.60381e-07							Housing (incl tabs)		1.61265e-07								Housing (incl tabs)		1.95579e-07									Housing (incl tabs)		1.44098e-07								Housing (incl tabs)		2.15413e-07
					Electricity		3.81069e-07							Electricity		3.69312e-07								Electricity		3.33349e-07									Electricity		2.86321e-07								Electricity		5.0132e-07
					Heat		9.40846e-08							Heat		1.03312e-07								Heat		8.37301e-08									Heat		7.11799e-08								Heat		1.56377e-07
					Others		1.20443e-07							Others		1.19086e-07								Others		7.9566e-08									Others		1.158e-07								Others		1.20128e-07
					HTP total									HTP total										HTP total											HTP total										HTP total
					Anode	Current coll	2.65379e-07							Anode	Current coll	4.84978e-07								Anode	Current coll	2.45005e-07									Anode	Current coll	2.18083e-07								Anode	Current coll	6.19667e-07
						Act mat	1.10283e-07								Act mat	7.50562e-08									Act mat	1.10296e-07										Act mat	9.67569e-08									Act mat	9.5901e-08
						Binder	1.66469e-08								Binder	1.13294e-08									Binder	1.66487e-08										Binder	1.46051e-08									Binder	1.44759e-08
						other	2.98582e-08								other	2.23609e-08									other	2.97244e-08										other	2.60974e-08									other	2.85712e-08
					Cathode	Current coll	2.48831e-07							Cathode	Current coll	3.37233e-07								Cathode	Current coll	2.29211e-07									Cathode	Current coll	2.0369e-07								Cathode	Current coll	5.99087e-07
						Act mat	1.60068e-05								Act mat	2.50206e-05									Act mat	2.62365e-07										Act mat	2.73331e-06									Act mat	6.91285e-07
						Binder	4.37491e-08								Binder	3.89439e-08									Binder	6.17562e-08										Binder	3.07074e-08									Binder	3.82991e-08
						other	3.26903e-08								other	2.98228e-08									other	3.09987e-07										other	2.3112e-08									other	2.34133e-08
					Electrolyte		3.99372e-07							Electrolyte		3.98292e-07								Electrolyte		3.84615e-07									Electrolyte		3.39131e-07								Electrolyte		6.14783e-07
					Separator		1.53631e-08							Separator		2.08296e-08								Separator		1.40557e-08									Separator		1.25485e-08								Separator		3.67552e-08
					Housing (incl tabs)		3.06459e-07							Housing (incl tabs)		3.10081e-07								Housing (incl tabs)		3.39727e-07									Housing (incl tabs)		2.77186e-07								Housing (incl tabs)		4.13701e-07
					Electricity		5.04179e-07							Electricity		4.88624e-07								Electricity		4.41042e-07									Electricity		3.78821e-07								Electricity		6.63278e-07
					Heat		1.7981e-07							Heat		1.97445e-07								Heat		1.60021e-07									Heat		1.36036e-07								Heat		2.98861e-07
					Others		1.90119e-07							Others		1.85003e-07								Others		1.45141e-07									Others		1.77085e-07								Others		1.87223e-07
							158.318	158.474	158.291	158.443	159.43	158.468	157.997
					per kWh	HTP-total	Na-NMC(111)	NMO-aqu	NMO	NMMT	NMC(111)	NMC(622)	LFP
					Anode	Foil	0.00167625	0.0030603	0.00154781	0.00137641	0.00388677	0.0312054	0.0566986
						Act mat	0.000696597	0.000473617	0.000696793	0.000610673	0.000601524	0.00072893	0.000828611
						Binder	0.000105148	7.14907e-05	0.000105178	9.21787e-05	9.07976e-05	2.21335e-05	2.51602e-05
						other	0.000188597	0.000141101	0.000187783	0.000164711	0.000179208	8.01577e-05	0.000112441
					Cathode	Foil	0.00157172	0.002128	0.00144804	0.00128557	0.00375768	0.000945874	0.00174173
						Act mat	0.101106	0.157884	0.00165748	0.0172511	0.00433598	0.0480045	0.0107355
						Binder	0.000276338	0.000245743	0.000390143	0.000193807	0.000240225	0.000137435	0.000188889
						other	0.000206485	0.000188187	0.00195833	0.00014587	0.000146856	0.000103869	0.000145689
					Electrolyte		0.0025226	0.00251329	0.00242979	0.0021404	0.00385613	0.000953461	0.00141868
					Separator		9.70398e-05	0.000131438	8.87967e-05	7.9199e-05	0.000230542	5.75998e-05	0.000106962
					Housing		0.00193572	0.00195666	0.00214622	0.00174944	0.00259487	0.0185457	0.0234949
					Electricity		0.00318461	0.0030833	0.00278627	0.0023909	0.00416031	0.00155903	0.00227992
					Heat		0.00113576	0.00124591	0.00101093	0.000858578	0.00187456	0.000584089	0.000931996
					Others		0.00120087	0.0011674	0.000916927	0.00111766	0.00117433	0.00112167	0.00114641

## Sheet: Recycling
	HYDROMETALLURGICAL RECYCLING										HYDROMETALLURGICAL RECYCLING										HYDROMETALLURGICAL RECYCLING										HYDROMETALLURGICAL RECYCLING										HYDROMETALLURGICAL RECYCLING
	Na-Ion battery cell, prismatic, Na-NMC(111)-HC (2021)										Na-Ion battery cell, prismatic, NMO-HC, aqueous electrolyte (2021)										Recycling of Na-Ion battery cell, prismatic, NMO-HC (2021)										Na-Ion battery cell, prismatic, NMMT - NaNiMnMgTiO-HC (2021)										Li-Ion battery cell, prismatic, NMC111-C (2021)
	Impact analysis			Na-Ion battery cell, prismatic, Na-NMC(111)-HC (2021)							Impact analysis			Na-Ion battery cell, prismatic, NMO-HC, aqueous electrolyte (2021)							Impact analysis			Recycling of Na-Ion battery cell, prismatic, NMO-HC (2021)							Impact analysis			Na-Ion battery cell, prismatic, NMMT - NaNiMnMgTiO-HC (2021)							Impact analysis			Li-Ion battery cell, prismatic, NMC111-C (2021)
																																									Name	Category	Inventory result	Unit	Impact factor	Unit	Impact result	Unit
																																									Acidification						-0.10025	molc H+ eq
																																									Climate change						-6.90694	kg CO2 eq
																																									Freshwater ecotoxicity						-1505.37	CTUe
																																									Freshwater eutrophication						-0.00717	kg P eq
																																									Human toxicity, cancer effects						-5.46639e-06	CTUh
																																									Human toxicity, non-cancer effects						-1.88736e-05	CTUh
																																									Ionizing radiation E (interim)						-1.97621e-05	CTUe
																																									Ionizing radiation HH						-2.76897	kBq U235 eq
																																									Land use						-5.57033	kg C deficit
																																									Marine eutrophication						-0.0151	kg N eq
																																									Mineral, fossil & ren resource depletion						-0.00792	kg Sb eq
																																									Ozone depletion						-6.90727e-07	kg CFC-11 eq
																																									Particulate matter						-0.00846	kg PM2.5 eq
																																									Photochemical ozone formation						-0.03226	kg NMVOC eq
																																									Terrestrial eutrophication						-0.12353	molc N eq
																																									Water resource depletion						-11.6407	m3 water eq
	Contribution tree			Na-Ion battery cell, prismatic, Na-NMC(111)-HC (2021)							Contribution tree			Na-Ion battery cell, prismatic, NMO-HC, aqueous electrolyte (2021)							Contribution tree			Recycling of Na-Ion battery cell, prismatic, NMO-HC (2021)							Contribution tree			Na-Ion battery cell, prismatic, NMMT - NaNiMnMgTiO-HC (2021)							Contribution tree			Li-Ion battery cell, prismatic, NMC111-C (2021)
	GWP										GWP										GWP										GWP										GWP
																																									Contribution			Process	Amount	Unit
																																										1		Treatment of Li-Ion battery cell, NMC111-C prismatic, hydrometallurgical treatment - RER	-6.90694	kg CO2 eq
																																											-0.0264	market for lime, hydrated, packed | lime, hydrated, packed | Cutoff, U - RER	0.18226	kg CO2 eq
																																											-0.0144	market for sulfuric acid | sulfuric acid | Cutoff, U - RoW	0.09925	kg CO2 eq
																																											-0.0095	market group for waste plastic, mixture | waste plastic, mixture | Cutoff, U - Europe without Switzerland	0.06577	kg CO2 eq
																																											-0.0087	market group for electricity, medium voltage | electricity, medium voltage | Cutoff, U - Europe without Switzerland	0.06034	kg CO2 eq
																																											-0.0078	market for chemical factory, organics | chemical factory, organics | Cutoff, U - GLO	0.0536	kg CO2 eq
																																											-0.0069	market for chemicals, inorganic | chemical, inorganic | Cutoff, U - GLO	0.04764	kg CO2 eq
																																											-0.0002	market for inert waste, for final disposal | inert waste, for final disposal | Cutoff, U - RoW	0.00167	kg CO2 eq
																																											0	market for wastewater, average | wastewater, average | Cutoff, U - Europe without Switzerland	0.00023	kg CO2 eq
																																											0.0005	treatment of waste gypsum, sanitary landfill | waste gypsum | Cutoff, U - Europe without Switzerland	-0.00314	kg CO2 eq
																																											0.0207	market for manganese sulfate | manganese sulfate | Cutoff, U - GLO	-0.14314	kg CO2 eq
																																											0.0704	market for aluminium, wrought alloy | aluminium, wrought alloy | Cutoff, U - GLO	-0.48591	kg CO2 eq
																																											0.0903	market for copper, cathode | copper, cathode | Cutoff, U - GLO	-0.62378	kg CO2 eq
																																											0.1229	market for nickel sulfate | nickel sulfate | Cutoff, U - GLO	-0.84911	kg CO2 eq
																																											0.2485	market for lithium hydroxide | lithium hydroxide | Cutoff, U - GLO	-1.71641	kg CO2 eq
																																											0.5207	market for cobalt carbonate | cobalt carbonate | Cutoff, U - GLO	-3.59622	kg CO2 eq
																																									RDP
																																									Contribution			Process	Amount	Unit
																																										1		Treatment of Li-Ion battery cell, NMC111-C prismatic, hydrometallurgical treatment - RER	-0.00792	kg Sb eq
																																											-0.0085	market for sulfuric acid | sulfuric acid | Cutoff, U - RoW	6.72104e-05	kg Sb eq
																																											-0.0028	market for chemical factory, organics | chemical factory, organics | Cutoff, U - GLO	2.24188e-05	kg Sb eq
																																											-0.0019	market for chemicals, inorganic | chemical, inorganic | Cutoff, U - GLO	1.53827e-05	kg Sb eq
																																											-0.0001	market group for electricity, medium voltage | electricity, medium voltage | Cutoff, U - Europe without Switzerland	4.55162e-07	kg Sb eq
																																											0	market for lime, hydrated, packed | lime, hydrated, packed | Cutoff, U - RER	3.06782e-07	kg Sb eq
																																											0	market group for waste plastic, mixture | waste plastic, mixture | Cutoff, U - Europe without Switzerland	3.73401e-08	kg Sb eq
																																											0	market for inert waste, for final disposal | inert waste, for final disposal | Cutoff, U - RoW	2.20216e-08	kg Sb eq
																																											0	market for wastewater, average | wastewater, average | Cutoff, U - Europe without Switzerland	4.96029e-09	kg Sb eq
																																											0	treatment of waste gypsum, sanitary landfill | waste gypsum | Cutoff, U - Europe without Switzerland	-3.80005e-08	kg Sb eq
																																											0.0007	market for aluminium, wrought alloy | aluminium, wrought alloy | Cutoff, U - GLO	-5.30944e-06	kg Sb eq
																																											0.002	market for manganese sulfate | manganese sulfate | Cutoff, U - GLO	-1.60608e-05	kg Sb eq
																																											0.0977	market for nickel sulfate | nickel sulfate | Cutoff, U - GLO	-0.00077	kg Sb eq
																																											0.2291	market for lithium hydroxide | lithium hydroxide | Cutoff, U - GLO	-0.00181	kg Sb eq
																																											0.2418	market for copper, cathode | copper, cathode | Cutoff, U - GLO	-0.00191	kg Sb eq
																																											0.4421	market for cobalt carbonate | cobalt carbonate | Cutoff, U - GLO	-0.0035	kg Sb eq
														Wh/kg
	Production impacts:		Wh/cell	158.318	158.474	158.291	158.443	159.43	158.468	157.997		Recycling impacts:		Wh/cell	158.318	158.474	158.291	158.443	159.43	158.468	157.997		Net impacts										Re-ordered for graph		NaNMC			NaMVP			NaMMO			NaNMMT			NaPBA
			per cell	NaNMC	NaMVP	NaMMO	NaNMMT	NaPBA	LiNMC	LiFP				per kg	NaNMC	NaMVP	NaMMO	NaNMMT	NaPBA	LiNMC	LiFP			per kg	NaNMC	NaMVP	NaMMO	NaNMMT	NaPBA	LiNMC	LiFP			per kg	Prod	Rec	Net	Prod	Rec	Net	Prod	Rec	Net	Prod	Rec	Net	Prod	Rec	Net
			AP	0.15678	0.13554	0.07892	0.08394	0.09139	0.07144	0.05301	molc H+ eq			AP					-0.10025					AP	0.15678	0.13554	0.07892	0.08394	-0.00886	0.07144	0.05301			AP	0.15678	0	0.15678	0.13554	0	0.13554	0.07892	0	0.07892	0.08394	0	0.08394	0.09139	-0.10025	-0.00886
			GWP	13.7187	14.2074	8.28422	8.01709	13.878	7.10008	7.83497	kg CO2 eq			GWP					-6.90694					GWP	13.7187	14.2074	8.28422	8.01709	6.97101	7.10008	7.83497			GWP	13.7187	0	13.7187	14.2074	0	14.2074	8.28422	0	8.28422	8.01709	0	8.01709	13.878	-6.90694	6.97101
			Htox	0.0183496	0.0276206	0.0027496	0.00466717	0.0043253	0.0164886	0.0157769	mCTUh			Htox					-0.02434			mCTUh		Htox	0.0183496	0.0276206	0.0027496	0.00466717	-0.0200147	0.0164886	0.0157769	mCTUh		Htox	0.0183496	0	0.0183496	0.0276206	0	0.0276206	0.0027496	0	0.0027496	0.00466717	0	0.00466717	0.0043253	-0.02434	-0.0200147
			RDP	0.00573	0.00124	0.00084	0.00144	0.00128	0.00503	0.00486	kg Sb eq			RDP					-0.00792					RDP	0.00573	0.00124	0.00084	0.00144	-0.00664	0.00503	0.00486			RDP	0.00573	0	0.00573	0.00124	0	0.00124	0.00084	0	0.00084	0.00144	0	0.00144	0.00128	-0.00792	-0.00664
			ODP	1.8274e-06	1.23342e-06	7.39456e-07	7.37173e-07	1.41684e-06	7.8499e-07	6.17554e-07	kg CFC-11 eq			ODP					-6.90727e-07					ODP	1.8274e-06	1.23342e-06	7.39456e-07	7.37173e-07	7.26113e-07	7.8499e-07	6.17554e-07			ODP	1.8274e-06	0	1.8274e-06	1.23342e-06	0	1.23342e-06	7.39456e-07	0	7.39456e-07	7.37173e-07	0	7.37173e-07	1.41684e-06	-6.90727e-07	7.26113e-07
			PMF	0.01158	0.0106	0.00658	0.00562	0.00758	0.00646	0.00557	kg PM2.5 eq			PMF					-0.00846					PMF	0.01158	0.0106	0.00658	0.00562	-0.00088	0.00646	0.00557			PMF	0.01158	0	0.01158	0.0106	0	0.0106	0.00658	0	0.00658	0.00562	0	0.00562	0.00758	-0.00846	-0.00088
																																			NaNMC			NaMVP			NaMMO			NaNMMT			NaPBA
			per kWh	NaNMC	NaMVP	NaMMO	NaNMMT	NaPBA	LiNMC	LiFP				per kWh	NaNMC	NaMVP	NaMMO	NaNMMT	NaPBA	LiNMC	LiFP			per kWh	NaNMC	NaMVP	NaMMO	NaNMMT	NaPBA	LiNMC	LiFP			per kWh	Prod	Rec	Net	Prod	Rec	Net	Prod	Rec	Net	Prod	Rec	Net	Prod	Rec	Net
			AP	0.990288	0.85528	0.498575	0.52978	0.57323	0.450816	0.335513	molc H+ eq			AP	#DIV/0!	#DIV/0!	#DIV/0!	#DIV/0!	#DIV/0!	#DIV/0!	#DIV/0!			AP	#DIV/0!	#DIV/0!	#DIV/0!	#DIV/0!	#DIV/0!	#DIV/0!	#DIV/0!			AP	0.990288	#DIV/0!	#DIV/0!	0.85528	#DIV/0!	#DIV/0!	0.498575	#DIV/0!	#DIV/0!	0.52978	#DIV/0!	#DIV/0!	0.57323	#DIV/0!	#DIV/0!
			GWP	86.6528	89.6514	52.3354	50.5992	87.0473	44.8044	49.5894	kg CO2 eq			GWP	#DIV/0!	#DIV/0!	#DIV/0!	#DIV/0!	#DIV/0!	#DIV/0!	#DIV/0!			GWP	#DIV/0!	#DIV/0!	#DIV/0!	#DIV/0!	#DIV/0!	#DIV/0!	#DIV/0!			GWP	86.6528	#DIV/0!	#DIV/0!	89.6514	#DIV/0!	#DIV/0!	52.3354	#DIV/0!	#DIV/0!	50.5992	#DIV/0!	#DIV/0!	87.0473	#DIV/0!	#DIV/0!
			Htox	0.115904	0.174291	0.0173705	0.0294564	0.0271298	0.10405	0.0998554	mCTUh			Htox	#DIV/0!	#DIV/0!	#DIV/0!	#DIV/0!	#DIV/0!	#DIV/0!	#DIV/0!			Htox	#DIV/0!	#DIV/0!	#DIV/0!	#DIV/0!	#DIV/0!	#DIV/0!	#DIV/0!	mCTUh		Htox	0.115904	#DIV/0!	#DIV/0!	0.174291	#DIV/0!	#DIV/0!	0.0173705	#DIV/0!	#DIV/0!	0.0294564	#DIV/0!	#DIV/0!	0.0271298	#DIV/0!	#DIV/0!
			RDP	0.0361931	0.00782461	0.00530668	0.00908844	0.0080286	0.0317414	0.0307601	kg Sb eq			RDP	#DIV/0!	#DIV/0!	#DIV/0!	#DIV/0!	#DIV/0!	#DIV/0!	#DIV/0!			RDP	#DIV/0!	#DIV/0!	#DIV/0!	#DIV/0!	#DIV/0!	#DIV/0!	#DIV/0!			RDP	0.0361931	#DIV/0!	#DIV/0!	0.00782461	#DIV/0!	#DIV/0!	0.00530668	#DIV/0!	#DIV/0!	0.00908844	#DIV/0!	#DIV/0!	0.0080286	#DIV/0!	#DIV/0!
			ODP	1.15426e-05	7.78309e-06	4.67149e-06	4.6526e-06	8.88691e-06	4.95361e-06	3.90864e-06	kg CFC-11 eq			ODP	#DIV/0!	#DIV/0!	#DIV/0!	#DIV/0!	#DIV/0!	#DIV/0!	#DIV/0!			ODP	#DIV/0!	#DIV/0!	#DIV/0!	#DIV/0!	#DIV/0!	#DIV/0!	#DIV/0!			ODP	1.15426e-05	#DIV/0!	#DIV/0!	7.78309e-06	#DIV/0!	#DIV/0!	4.67149e-06	#DIV/0!	#DIV/0!	4.6526e-06	#DIV/0!	#DIV/0!	8.88691e-06	#DIV/0!	#DIV/0!
			PMF	0.0731441	0.0668878	0.041569	0.0354702	0.0475444	0.0407653	0.0352538	kg PM2.5 eq			PMF	#DIV/0!	#DIV/0!	#DIV/0!	#DIV/0!	#DIV/0!	#DIV/0!	#DIV/0!			PMF	#DIV/0!	#DIV/0!	#DIV/0!	#DIV/0!	#DIV/0!	#DIV/0!	#DIV/0!			PMF	0.0731441	#DIV/0!	#DIV/0!	0.0668878	#DIV/0!	#DIV/0!	0.041569	#DIV/0!	#DIV/0!	0.0354702	#DIV/0!	#DIV/0!	0.0475444	#DIV/0!	#DIV/0!
	ADVANCED HYDROMETALLURGICAL RECYCLING										ADVANCED HYDROMETALLURGICAL RECYCLING										ADVANCED HYDROMETALLURGICAL RECYCLING										ADVANCED HYDROMETALLURGICAL RECYCLING										ADVANCED HYDROMETALLURGICAL RECYCLING
	Na-Ion battery cell, prismatic, NaNMC(111)-HC (2021)										Na-Ion battery cell, prismatic, NaMVP-HC (2021)										Recycling of Na-Ion battery cell, prismatic, NaMMO-HC (2021)										Na-Ion battery cell, prismatic, NaNMMT - NaNiMnMgTiO-HC (2021)										PBD - prussian blue
						Wh/cell	158.318		158.318	158.318						Wh/cell	158.474		158.474	158.474						Wh/cell	158.291		158.291	158.291						Wh/cell	159.43		159.43	159.43						Wh/cell	159.43		159.43
	Impact analysis - whole recycling			Na-Ion battery cell, prismatic, NaNMC(111)-HC (2021)							Impact analysis - whole recycling			Na-Ion battery cell, prismatic, NaMVP-HC (2021)							Impact analysis - whole recycling			Recycling of Na-Ion battery cell, prismatic, NaMMO-HC (2021)							Impact analysis - whole recycling			Na-Ion battery cell, prismatic, NaNMMT - NaNiMnMgTiO-HC (2021)							Impact analysis - whole recycling			PBD - prussian blue
	Name	Category	Inventory result	Unit	Impact factor	Unit	Impact result	Unit	from black mass processing	mechnical only	Name	Category	Inventory result	Unit	Impact factor	Unit	Impact result	Unit	from black mass processing	mechnical only	Name	Category	Inventory result	Unit	Impact factor	Unit	Impact result	Unit	from black mass processing	mechnical only	Name	Category	Inventory result	Unit	Impact factor	Unit	Impact result	Unit	from black mass processing	mechnical only	Name	Category	Inventory result	Unit	Impact factor	Unit	Impact result	Unit	from black mass processing
	Acidification						-0.09782	molc H+ eq	-0.08638	-0.01144	Acidification						-0.03407	molc H+ eq	-0.02065	-0.01342	Acidification						-0.04618	molc H+ eq	-0.03524	-0.01094	Acidification						-0.0532	molc H+ eq	-0.04351	-0.00969	Acidification						-0.0449	molc H+ eq	-0.02287
	Climate change						-5.05023	kg CO2 eq	-3.57547	-1.47476	Climate change						-1.31878	kg CO2 eq	0.44375	-1.76253	Climate change						-1.00348	kg CO2 eq	0.41071	-1.41419	Climate change						-2.11352	kg CO2 eq	-0.39502	-1.7185	Climate change						-2.09008	kg CO2 eq	0.84662
	Freshwater ecotoxicity						-360.816	CTUe	-314.469	-46.3466	Freshwater ecotoxicity						-44.862	CTUe	10.8697	-55.7317	Freshwater ecotoxicity						-33.522	CTUe	10.3078	-43.8298	Freshwater ecotoxicity						-92.5867	CTUe	-49.9396	-42.6471	Freshwater ecotoxicity						-73.3263	CTUe	18.4865
	Freshwater eutrophication						-0.00151	kg P eq	-0.00113	-0.00038	Freshwater eutrophication						-4.94247e-05	kg P eq	0.00045	-0.000499425	Freshwater eutrophication						4.128e-05	kg P eq	0.00042	-0.00037872	Freshwater eutrophication						-0.00041	kg P eq	6.27213e-05	-0.000472721	Freshwater eutrophication						-0.00026	kg P eq	0.00061
	Human toxicity, cancer effects						-4.37822e-06	CTUh	-4.00005e-06	-3.7817e-07	Human toxicity, cancer effects						-4.05756e-07	CTUh	5.5385e-08	-4.61141e-07	Human toxicity, cancer effects						-3.08629e-07	CTUh	4.83569e-08	-3.56986e-07	Human toxicity, cancer effects						-9.35174e-07	CTUh	-5.96885e-07	-3.38289e-07	Human toxicity, cancer effects						-6.56079e-07	CTUh	1.02817e-07
	Human toxicity, non-cancer effects						-8.19396e-06	CTUh	-7.69516e-06	-4.988e-07	Human toxicity, non-cancer effects						-2.68004e-07	CTUh	3.19359e-07	-5.87363e-07	Human toxicity, non-cancer effects						-1.62992e-07	CTUh	3.1497e-07	-4.77962e-07	Human toxicity, non-cancer effects						-1.47425e-06	CTUh	-1.01182e-06	-4.6243e-07	Human toxicity, non-cancer effects						-5.81505e-07	CTUh	3.92018e-07
	Ionizing radiation E (interim)						-1.67738e-05	CTUe	-1.67053e-05	-6.85e-08	Ionizing radiation E (interim)						2.87636e-07	CTUe	4.13539e-07	-1.25903e-07	Ionizing radiation E (interim)						1.47052e-07	CTUe	2.38812e-07	-9.176e-08	Ionizing radiation E (interim)						-2.58053e-06	CTUe	-2.34756e-06	-2.3297e-07	Ionizing radiation E (interim)						2.19772e-07	CTUe	5.1068e-07
	Ionizing radiation HH						-2.10144	kBq U235 eq	-2.10572	0.00428	Ionizing radiation HH						0.20158	kBq U235 eq	0.21556	-0.01398	Ionizing radiation HH						0.17042	kBq U235 eq	0.17661	-0.00619	Ionizing radiation HH						-0.24686	kBq U235 eq	-0.18915	-0.05771	Ionizing radiation HH						0.19721	kBq U235 eq	0.25388
	Land use						-5.57018	kg C deficit	-4.68128	-0.8889	Land use						-1.65816	kg C deficit	-0.65847	-0.99969	Land use						-1.83073	kg C deficit	-0.97558	-0.85515	Land use						-4.46754	kg C deficit	-3.64021	-0.82733	Land use						-2.35905	kg C deficit	-0.73231
	Marine eutrophication						-0.0175	kg N eq	-0.01592	-0.00158	Marine eutrophication						-0.00836	kg N eq	-0.00646	-0.0019	Marine eutrophication						-0.00954	kg N eq	-0.00803	-0.00151	Marine eutrophication						-0.01048	kg N eq	-0.00895	-0.00153	Marine eutrophication						-0.00978	kg N eq	-0.00663
	Mineral, fossil & ren resource depletion						-0.00447	kg Sb eq	-0.00385	-0.00062	Mineral, fossil & ren resource depletion						-0.00062	kg Sb eq	6.68898e-06	-0.000626689	Mineral, fossil & ren resource depletion						-0.00061	kg Sb eq	-7.46501e-06	-0.000602535	Mineral, fossil & ren resource depletion						-0.00097	kg Sb eq	-0.00064	-0.00033	Mineral, fossil & ren resource depletion						-0.00094	kg Sb eq	2.40683e-05
	Ozone depletion						-6.35962e-07	kg CFC-11 eq	-5.44378e-07	-9.1584e-08	Ozone depletion						-1.03138e-07	kg CFC-11 eq	-2.12268e-09	-1.01015e-07	Ozone depletion						-1.50421e-07	kg CFC-11 eq	-6.21936e-08	-8.82274e-08	Ozone depletion						-2.09503e-07	kg CFC-11 eq	-1.25456e-07	-8.4047e-08	Ozone depletion						-1.17568e-07	kg CFC-11 eq	4.56067e-08
	Particulate matter						-0.00689	kg PM2.5 eq	-0.00539	-0.0015	Particulate matter						-0.00238	kg PM2.5 eq	-0.00057	-0.00181	Particulate matter						-0.00255	kg PM2.5 eq	-0.00112	-0.00143	Particulate matter						-0.00329	kg PM2.5 eq	-0.00192	-0.00137	Particulate matter						-0.00338	kg PM2.5 eq	-0.00042
	Photochemical ozone formation						-0.03522	kg NMVOC eq	-0.03024	-0.00498	Photochemical ozone formation						-0.01619	kg NMVOC eq	-0.01031	-0.00588	Photochemical ozone formation						-0.01989	kg NMVOC eq	-0.01515	-0.00474	Photochemical ozone formation						-0.02105	kg NMVOC eq	-0.01637	-0.00468	Photochemical ozone formation						-0.02104	kg NMVOC eq	-0.01137
	Terrestrial eutrophication						-0.15214	molc N eq	-0.13519	-0.01695	Terrestrial eutrophication						-0.08313	molc N eq	-0.06281	-0.02032	Terrestrial eutrophication						-0.10362	molc N eq	-0.08746	-0.01616	Terrestrial eutrophication						-0.1029	molc N eq	-0.0867	-0.0162	Terrestrial eutrophication						-0.10422	molc N eq	-0.07067
	Water resource depletion						-8.1726	m3 water eq	-7.13296	-1.03964	Water resource depletion						-0.45568	m3 water eq	0.85471	-1.31039	Water resource depletion						-0.28217	m3 water eq	0.7259	-1.00807	Water resource depletion						-1.73306	m3 water eq	-0.5679	-1.16516	Water resource depletion						-1.0732	m3 water eq	1.16541
	Impact analysis - hydrometallurgy			Na-Ion battery cell, prismatic, NaNMC(111)-HC (2021)							Impact analysis - hydrometallurgy			Na-Ion battery cell, prismatic, NaMVP-HC (2021)							Impact analysis - hydrometallurgy			Recycling of Na-Ion battery cell, prismatic, NaMMO-HC (2021)							Impact analysis - hydrometallurgy			Na-Ion battery cell, prismatic, NaNMMT - NaNiMnMgTiO-HC (2021)							Impact analysis - hydrometallurgy			PBD - prussian blue
	Name	Category	Inventory result	Unit	Impact factor	Unit	Impact result	Unit			Name	Category	Inventory result	Unit	Impact factor	Unit	Impact result	Unit			Name	Category	Inventory result	Unit	Impact factor	Unit	Impact result	Unit													Name	Category	Inventory result	Unit	Impact factor	Unit	Impact result	Unit
	Acidification						-0.08638	molc H+ eq			Acidification						-0.02065	molc H+ eq			Acidification						-0.03524	molc H+ eq									-0.04351				Acidification						-0.02287	molc H+ eq
	Climate change						-3.57547	kg CO2 eq			Climate change						0.44375	kg CO2 eq			Climate change						0.41071	kg CO2 eq									-0.39502				Climate change						0.84662	kg CO2 eq
	Freshwater ecotoxicity						-314.469	CTUe			Freshwater ecotoxicity						10.8697	CTUe			Freshwater ecotoxicity						10.3078	CTUe									-49.9396				Freshwater ecotoxicity						18.4865	CTUe
	Freshwater eutrophication						-0.00113	kg P eq			Freshwater eutrophication						0.00045	kg P eq			Freshwater eutrophication						0.00042	kg P eq									6.27213e-05				Freshwater eutrophication						0.00061	kg P eq
	Human toxicity, cancer effects						-4.00005e-06	CTUh			Human toxicity, cancer effects						5.5385e-08	CTUh			Human toxicity, cancer effects						4.83569e-08	CTUh									-5.96885e-07				Human toxicity, cancer effects						1.02817e-07	CTUh
	Human toxicity, non-cancer effects						-7.69516e-06	CTUh			Human toxicity, non-cancer effects						3.19359e-07	CTUh			Human toxicity, non-cancer effects						3.1497e-07	CTUh									-1.01182e-06				Human toxicity, non-cancer effects						3.92018e-07	CTUh
	Ionizing radiation E (interim)						-1.67053e-05	CTUe			Ionizing radiation E (interim)						4.13539e-07	CTUe			Ionizing radiation E (interim)						2.38812e-07	CTUe									-2.34756e-06				Ionizing radiation E (interim)						5.1068e-07	CTUe
	Ionizing radiation HH						-2.10572	kBq U235 eq			Ionizing radiation HH						0.21556	kBq U235 eq			Ionizing radiation HH						0.17661	kBq U235 eq									-0.18915				Ionizing radiation HH						0.25388	kBq U235 eq
	Land use						-4.68128	kg C deficit			Land use						-0.65847	kg C deficit			Land use						-0.97558	kg C deficit									-3.64021				Land use						-0.73231	kg C deficit
	Marine eutrophication						-0.01592	kg N eq			Marine eutrophication						-0.00646	kg N eq			Marine eutrophication						-0.00803	kg N eq									-0.00895				Marine eutrophication						-0.00663	kg N eq
	Mineral, fossil & ren resource depletion						-0.00385	kg Sb eq			Mineral, fossil & ren resource depletion						6.68898e-06	kg Sb eq			Mineral, fossil & ren resource depletion						-7.46501e-06	kg Sb eq									-0.00064				Mineral, fossil & ren resource depletion						2.40683e-05	kg Sb eq
	Ozone depletion						-5.44378e-07	kg CFC-11 eq			Ozone depletion						-2.12268e-09	kg CFC-11 eq			Ozone depletion						-6.21936e-08	kg CFC-11 eq									-1.25456e-07				Ozone depletion						4.56067e-08	kg CFC-11 eq
	Particulate matter						-0.00539	kg PM2.5 eq			Particulate matter						-0.00057	kg PM2.5 eq			Particulate matter						-0.00112	kg PM2.5 eq									-0.00192				Particulate matter						-0.00042	kg PM2.5 eq
	Photochemical ozone formation						-0.03024	kg NMVOC eq			Photochemical ozone formation						-0.01031	kg NMVOC eq			Photochemical ozone formation						-0.01515	kg NMVOC eq									-0.01637				Photochemical ozone formation						-0.01137	kg NMVOC eq
	Terrestrial eutrophication						-0.13519	molc N eq			Terrestrial eutrophication						-0.06281	molc N eq			Terrestrial eutrophication						-0.08746	molc N eq									-0.0867				Terrestrial eutrophication						-0.07067	molc N eq
	Water resource depletion						-7.13296	m3 water eq			Water resource depletion						0.85471	m3 water eq			Water resource depletion						0.7259	m3 water eq									-0.5679				Water resource depletion						1.16541	m3 water eq
														Wh/kg
	Production impacts:		Wh/cell	158.318	158.474	158.291	158.443	159.43	158.468	157.997		Recycling impacts:		Wh/cell	158.318	158.474	158.291	158.443	159.43	158.468	157.997												Re-ordered for graph		NaNMC			NaMVP			NaMMO			NaNMMT			NaPBA
			per cell	NaNMC	NaMVP	NaMMO	NaNMMT	NaPBA	LiNMC	LiFP				per cell	NaNMC	NaMVP	NaMMO	NaNMMT	NaPBA	LiNMC	LiFP													per cell	Prod	Rec	Net	Prod	Rec	Net	Prod	Rec	Net	Prod	Rec	Net	Prod	Rec	Net
			AP	0.15678	0.13554	0.07892	0.08394	0.09139	0.07144	0.05301	molc H+ eq			AP	-0.09782	-0.03407	-0.04618	-0.0532	-0.0449	-0.04759	-0.01838	molc H+ eq												AP	0.15678	-0.09782	0.05896	0.13554	-0.03407	0.10147	0.07892	-0.04618	0.03274	0.08394	-0.0532	0.03074	0.09139	-0.0449	0.04649
			GWP	13.7187	14.2074	8.28422	8.01709	13.878	7.10008	7.83497	kg CO2 eq			GWP	-5.05023	-1.31878	-1.00348	-2.11352	-2.09008	-2.75495	-1.03389	kg CO2 eq												GWP	13.7187	-5.05023	8.66843	14.2074	-1.31878	12.8887	8.28422	-1.00348	7.28074	8.01709	-2.11352	5.90357	13.878	-2.09008	11.7879
			Htox	0.0183496	0.0276206	0.0027496	0.00466717	0.0043253	0.0164886	0.0157769	mCTUh			Htox	-0.0125722	-0.00067376	-0.000471621	-0.00240942	-0.00123758	-0.013465	-0.0116378	mCTUh												Htox	0.0183496	-0.0125722	0.00577738	0.0276206	-0.00067376	0.0269468	0.0027496	-0.000471621	0.00227797	0.00466717	-0.00240942	0.00225775	0.0043253	-0.00123758	0.00308772
			RDP	0.00573	0.00124	0.00084	0.00144	0.00128	0.00503	0.00486	kg Sb eq			RDP	-0.00447	-0.00062	-0.00061	-0.00097	-0.00094	-0.00476	-0.00394	kg Sb eq												RDP	0.00573	-0.00447	0.00126	0.00124	-0.00062	0.00062	0.00084	-0.00061	0.00023	0.00144	-0.00097	0.00047	0.00128	-0.00094	0.00034
			ODP	1.8274e-06	1.23342e-06	7.39456e-07	7.37173e-07	1.41684e-06	7.8499e-07	6.17554e-07	kg CFC-11 eq			ODP	-6.35962e-07	-1.03138e-07	-1.50421e-07	-2.09503e-07	-1.17568e-07	-2.93987e-07	-4.56666e-08	kg CFC-11 eq												ODP	1.8274e-06	-6.35962e-07	1.19144e-06	1.23342e-06	-1.03138e-07	1.13028e-06	7.39456e-07	-1.50421e-07	5.89035e-07	7.37173e-07	-2.09503e-07	5.2767e-07	1.41684e-06	-1.17568e-07	1.29927e-06
			PMF	0.01158	0.0106	0.00658	0.00562	0.00758	0.00646	0.00557	kg PM2.5 eq			PMF	-0.00689	-0.00238	-0.00255	-0.00329	-0.00338	-0.00433	-0.00245	kg PM2.5 eq												PMF	0.01158	-0.00689	0.00469	0.0106	-0.00238	0.00822	0.00658	-0.00255	0.00403	0.00562	-0.00329	0.00233	0.00758	-0.00338	0.0042
																																			NaNMC			NaMVP			NaMMO			NaNMMT			NaPBA
			per kWh	NaNMC	NaMVP	NaMMO	NaNMMT	NaPBA	LiNMC	LiFP				per kWh	NaNMC	NaMVP	NaMMO	NaNMMT	NaPBA	LiNMC	LiFP													per kWh	Prod	Rec	Net	Prod	Rec	Net	Prod	Rec	Net	Prod	Rec	Net	Prod	Rec	Net
			AP	0.990288	0.85528	0.498575	0.52978	0.57323	0.450816	0.335513	molc H+ eq			AP	-0.617872	-0.214987	-0.291741	-0.335767	-0.281628	-0.300313	-0.116331	molc H+ eq												AP	0.990288	-0.617872	0.372416	0.85528	-0.214987	0.640293	0.498575	-0.291741	0.206834	0.52978	-0.335767	0.194013	0.57323	-0.281628	0.291601
			GWP	86.6528	89.6514	52.3354	50.5992	87.0473	44.8044	49.5894	kg CO2 eq			GWP	-31.8994	-8.32172	-6.33946	-13.3393	-13.1097	-17.3849	-6.54373	kg CO2 eq												GWP	86.6528	-31.8994	54.7534	89.6514	-8.32172	81.3297	52.3354	-6.33946	45.9959	50.5992	-13.3393	37.2599	87.0473	-13.1097	73.9376
			Htox	0.115904	0.174291	0.0173705	0.0294564	0.0271298	0.10405	0.0998554	mCTUh			Htox	-0.0794112	-0.00425154	-0.00297945	-0.0152069	-0.00776255	-0.08497	-0.0736582	mCTUh												Htox	0.115904	-0.0794112	0.0364924	0.174291	-0.00425154	0.170039	0.0173705	-0.00297945	0.014391	0.0294564	-0.0152069	0.0142496	0.0271298	-0.00776255	0.0193672
			RDP	0.0361931	0.00782461	0.00530668	0.00908844	0.0080286	0.0317414	0.0307601	kg Sb eq			RDP	-0.0282344	-0.0039123	-0.00385366	-0.00612207	-0.005896	-0.0300376	-0.0249372	kg Sb eq												RDP	0.0361931	-0.0282344	0.00795869	0.00782461	-0.0039123	0.0039123	0.00530668	-0.00385366	0.00145302	0.00908844	-0.00612207	0.00296637	0.0080286	-0.005896	0.0021326
			ODP	1.15426e-05	7.78309e-06	4.67149e-06	4.6526e-06	8.88691e-06	4.95361e-06	3.90864e-06	kg CFC-11 eq			ODP	-4.017e-06	-6.50818e-07	-9.50281e-07	-1.32226e-06	-7.37427e-07	-1.85518e-06	-2.89035e-07	kg CFC-11 eq												ODP	1.15426e-05	-4.017e-06	7.52562e-06	7.78309e-06	-6.50818e-07	7.13227e-06	4.67149e-06	-9.50281e-07	3.72121e-06	4.6526e-06	-1.32226e-06	3.33034e-06	8.88691e-06	-7.37427e-07	8.14948e-06
			PMF	0.0731441	0.0668878	0.041569	0.0354702	0.0475444	0.0407653	0.0352538	kg PM2.5 eq			PMF	-0.0435201	-0.0150182	-0.0161096	-0.0207646	-0.0212005	-0.0273241	-0.0155066	kg PM2.5 eq												PMF	0.0731441	-0.0435201	0.029624	0.0668878	-0.0150182	0.0518696	0.041569	-0.0161096	0.0254594	0.0354702	-0.0207646	0.0147056	0.0475444	-0.0212005	0.0263438
							Recycling break-down										Recycling break-down										Recycling break-down										Recycling break-down										Recycling break-down
							per kWh	Production	Hydromet. rec.	Mech. recyc.	Net full Rec.	Net mech. Rec.					per kWh	Prod	from black mass processing	mechnical only	net	net mech					per kWh	Prod	from black mass processing	mechnical only	net	net mech					per kWh	Prod	from black mass processing	mechnical only	net	net mech					per kWh	Prod	from black mass processing
							AP	0.990288	-0.545612	-0.0722598	0.372416	0.918028					AP	0.85528	-0.130305	-0.0846825	0.640293	0.770598					AP	0.498575	-0.222628	-0.0691132	0.206834	0.429462	molc H+ eq				AP	0.52978	-0.27291	-0.060779	0.196091	0.469001					AP	0.57323	-0.143449
							GWP	86.6528	-22.5842	-9.3152	54.7534	77.3376					GWP	89.6514	2.80014	-11.1219	81.3297	78.5295					GWP	52.3354	2.59465	-8.93411	45.9959	43.4012	kg CO2 eq				GWP	50.5992	-2.4777	-10.779	37.3425	39.8202					GWP	87.0473	5.31029
							Htox	0.115904	-0.0738719	-0.00553931	0.0364924	0.110364					Htox	0.174291	0.0023647	-0.00661624	0.170039	0.167674					Htox	0.0173705	0.00229531	-0.00527476	0.014391	0.0120957	mCTUh				Htox	0.0294564	-0.0100904	-0.00502239	0.0143437	0.0244341					Htox	0.0271298	0.00310378
							RDP	0.0361931	-0.0243182	-0.00391618	0.00795869	0.0322769					RDP	0.00782461	4.22086e-05	-0.00395451	0.0039123	0.0038701					RDP	0.00530668	-4.716e-05	-0.0038065	0.00145302	0.00150018	kg Sb eq				RDP	0.00908844	-0.0040143	-0.00206987	0.00300426	0.00701856					RDP	0.0080286	0.000150965
							ODP	1.15426e-05	-3.43852e-06	-5.78483e-07	7.52562e-06	1.09641e-05					ODP	7.78309e-06	-1.33945e-08	-6.37424e-07	7.13227e-06	7.14566e-06					ODP	4.67149e-06	-3.92907e-07	-5.57374e-07	3.72121e-06	4.11412e-06	kg CFC-11 eq				ODP	4.6526e-06	-7.86903e-07	-5.27172e-07	3.33853e-06	4.12543e-06					ODP	8.88691e-06	2.86061e-07
							PMF	0.0731441	-0.0340455	-0.00947463	0.029624	0.0636695					PMF	0.0668878	-0.0035968	-0.0114214	0.0518696	0.0554664					PMF	0.041569	-0.00707557	-0.00903399	0.0254594	0.032535	kg PM2.5 eq				PMF	0.0354702	-0.0120429	-0.00859311	0.0148341	0.026877					PMF	0.0475444	-0.00263438
						Recycling break-down, per kWh
							AP	Production	Hydromet. rec.	Mech. recyc.	Net mech. Rec.	Net full Rec.		GWP	Production	Hydromet. rec.	Mech. recyc.	Net mech. Rec.	Net full Rec.		ADP	Production	Hydromet. rec.	Mech. recyc.	Net mech. Rec.	Net full Rec.		Htox	Production	Hydromet. rec.	Mech. recyc.	Net mech. Rec.	Net full Rec.
							NaNMC	0.990288	-0.545612	-0.0722598	0.918028	0.372416		NaNMC	86.6528	-22.5842	-9.3152	77.3376	54.7534		NaNMC	0.0361931	-0.0243182	-0.00391618	0.0322769	0.00795869		NaNMC	0.115904	-0.0738719	-0.00553931	0.110364	0.0364924
							NaMVP	0.85528	-0.130305	-0.0846825	0.770598	0.640293		NaMVP	89.6514	2.80014	-11.1219	78.5295	81.3297		NaMVP	0.00782461	4.22086e-05	-0.00395451	0.0038701	0.0039123		NaMVP	0.174291	0.0023647	-0.00661624	0.167674	0.170039
							NaMMO	0.498575	-0.222628	-0.0691132	0.429462	0.206834		NaMMO	52.3354	2.59465	-8.93411	43.4012	45.9959		NaMMO	0.00530668	-4.716e-05	-0.0038065	0.00150018	0.00145302		NaMMO	0.0173705	0.00229531	-0.00527476	0.0120957	0.014391
							NaNMMT	0.52978	-0.27291	-0.060779	0.469001	0.196091		NaNMMT	50.5992	-2.4777	-10.779	39.8202	37.3425		NaNMMT	0.00908844	-0.0040143	-0.00206987	0.00701856	0.00300426		NaNMMT	0.0294564	-0.0100904	-0.00502239	0.0244341	0.0143437
							NaPBA	0.57323	-0.143449	-0.13818	0.43505	0.291601		NaPBA	87.0473	5.31029	-18.42	68.6273	73.9376		NaPBA	0.0080286	0.000150965	-0.00604697	0.00198163	0.0021326		NaPBA	0.0271298	0.00310378	-0.0108663	0.0162634	0.0193672
							LiNMC	0.450816	-0.22585	-0.0744629	0.376353	0.150503		LiNMC	44.8044	-12.3375	-5.04738	39.7571	27.4196		LiNMC	0.0317414	-0.0166595	-0.0133781	0.0183633	0.00170381		LiNMC	0.10405	-0.0392835	-0.0456865	0.0583633	0.0190799
							LiFP	0.335513	0.00417729	-0.120509	0.215004	0.219181		LiFP	49.5894	1.71959	-8.26332	41.326	43.0456		LiFP	0.0307601	-0.00348108	-0.0214561	0.00930397	0.0058229		LiFP	0.0998554	0.000266528	-0.0739248	0.0259307	0.0261972
					AP		NaNMC				NaMVP				NaMMO				NaNMMT				NaPBA				LiNMC				LiFP
							Production	Mech. Rec.	Hydrom. Rec.	Net	Production	Mech. Rec.	Hydrom. Rec.	Net	Production	Mech. Rec.	Hydrom. Rec.	Net	Production	Mech. Rec.	Hydrom. Rec.	Net	Production	Mech. Rec.	Hydrom. Rec.	Net	Production	Mech. Rec.	Hydrom. Rec.	Net	Production	Mech. Rec.	Hydrom. Rec.	Net
					Prod		0.990288				0.85528				0.498575				0.52978				0.57323				0.450816				0.335513
					Mech			0.918028	0.372416			0.770598	0.640293			0.429462	0.206834			0.469001	0.196091			0.43505	0.291601			0.376353	0.150503			0.215004	0.219181
					Hydro			0.0722598	0.545612			0.0846825	0.130305			0.0691132	0.222628			0.060779	0.27291			0.13818	0.143449			0.0744629	0.22585			0.120509	-0.00417729
					Net					0.372416				0.640293				0.206834				0.196091				0.291601				0.150503				0.219181
					GWP		NaNMC				NaMVP				NaMMO				NaNMMT				NaPBA				LiNMC				LiFP
							Production	Mech. Rec.	Hydrom. Rec.	Net	Production	Mech. Rec.	Hydrom. Rec.	Net	Production	Mech. Rec.	Hydrom. Rec.	Net	Production	Mech. Rec.	Hydrom. Rec.	Net	Production	Mech. Rec.	Hydrom. Rec.	Net	Production	Mech. Rec.	Hydrom. Rec.	Net	Production	Mech. Rec.	Hydrom. Rec.	Net
					Prod		86.6528				89.6514				52.3354				50.5992				87.0473				44.8044				49.5894
					Mech			77.3376	54.7534			78.5295	81.3297			43.4012	45.9959			39.8202	37.3425			68.6273	73.9376			39.7571	27.4196			41.326	43.0456
					Hydro			9.3152	22.5842			11.1219	-2.80014			8.93411	-2.59465			10.779	2.4777			18.42	-5.31029			5.04738	12.3375			8.26332	-1.71959
					Net					54.7534				81.3297				45.9959				37.3425				73.9376				27.4196				43.0456
					ADP		NaNMC				NaMVP				NaMMO				NaNMMT				NaPBA				LiNMC				LiFP
							Production	Mech. Rec.	Hydrom. Rec.	Net	Production	Mech. Rec.	Hydrom. Rec.	Net	Production	Mech. Rec.	Hydrom. Rec.	Net	Production	Mech. Rec.	Hydrom. Rec.	Net	Production	Mech. Rec.	Hydrom. Rec.	Net	Production	Mech. Rec.	Hydrom. Rec.	Net	Production	Mech. Rec.	Hydrom. Rec.	Net
					Prod		0.0361931				0.00782461				0.00530668				0.00908844				0.0080286				0.0317414				0.0307601
					Mech			0.0322769	0.00795869			0.0038701	0.0039123			0.00150018	0.00145302			0.00701856	0.00300426			0.00198163	0.0021326			0.0183633	0.00170381			0.00930397	0.0058229
					Hydro			0.00391618	0.0243182			0.00395451	-4.22086e-05			0.0038065	4.716e-05			0.00206987	0.0040143			0.00604697	-0.000150965			0.0133781	0.0166595			0.0214561	0.00348108
					Net					0.00795869				0.0039123				0.00145302				0.00300426				0.0021326				0.00170381				0.0058229
					HTP		NaNMC				NaMVP				NaMMO				NaNMMT				NaPBA				LiNMC				LiFP
							Production	Mech. Rec.	Hydrom. Rec.	Net	Production	Mech. Rec.	Hydrom. Rec.	Net	Production	Mech. Rec.	Hydrom. Rec.	Net	Production	Mech. Rec.	Hydrom. Rec.	Net	Production	Mech. Rec.	Hydrom. Rec.	Net	Production	Mech. Rec.	Hydrom. Rec.	Net	Production	Mech. Rec.	Hydrom. Rec.	Net
					Prod		0.115904				0.174291				0.0173705				0.0294564				0.0271298				0.10405				0.0998554
					Mech			0.110364	0.0364924			0.167674	0.170039			0.0120957	0.014391			0.0244341	0.0143437			0.0162634	0.0193672			0.0583633	0.0190799			0.0259307	0.0261972
					Hydro			0.00553931	0.0738719			0.00661624	-0.0023647			0.00527476	-0.00229531			0.00502239	0.0100904			0.0108663	-0.00310378			0.0456865	0.0392835			0.0739248	-0.000266528
					Net					0.0364924				0.170039				0.014391				0.0143437				0.0193672				0.0190799				0.0261972
																																									Iodine, in water	Resource / in water	-3.95384e-08	kg	0.00222	kg Sb eq/kg	-8.77753e-11	kg Sb eq	2.34363e-08
																																									Iron, in ground	Resource / in ground	-2.95186	kg	1.66e-06	kg Sb eq/kg	-4.90009e-06	kg Sb eq	0.00130834
																																									Lanthanum, in ground	Resource / in ground	3.83966e-07	kg	0.00057	kg Sb eq/kg	2.18477e-10	kg Sb eq	-5.83342e-08
																																									Lead, in ground	Resource / in ground	-0.00221	kg	0.015	kg Sb eq/kg	-3.32189e-05	kg Sb eq	0.00886957
																																									Lithium, in ground	Resource / in ground	-0.05797	kg	0.0133	kg Sb eq/kg	-0.00077	kg Sb eq	0.205593
																																									Magnesium, in ground	Resource / in ground	-0.13718	kg	2.48e-06	kg Sb eq/kg	-3.402e-07	kg Sb eq	9.08347e-05
																																									Manganese, in ground	Resource / in ground	-0.06768	kg	2.35e-05	kg Sb eq/kg	-1.59042e-06	kg Sb eq	0.000424648
																																									Mercury, in ground	Resource / in ground	-9.07124e-09	kg	2.62	kg Sb eq/kg	-2.37667e-08	kg Sb eq	6.3458e-06
																																									Molybdenum, in ground	Resource / in ground	-0.00209	kg	0.0711	kg Sb eq/kg	-0.00015	kg Sb eq	0.0400506
																																									Neodymium, in ground	Resource / in ground	-1.32493e-07	kg	0.00057	kg Sb eq/kg	-7.53887e-11	kg Sb eq	2.01291e-08
																																									Nickel, in ground	Resource / in ground	-0.11647	kg	0.00418	kg Sb eq/kg	-0.00049	kg Sb eq	0.130832
																																									Oil, crude	Resource / in ground	-0.44266	kg	3.3e-07	kg Sb eq/kg	-1.46077e-07	kg Sb eq	3.90031e-05
																																									Palladium, in ground	Resource / in ground	-2.65506e-07	kg	9.36	kg Sb eq/kg	-2.48513e-06	kg Sb eq	0.000663539
																																									Peat	Resource / biotic	-0.0017	kg	6.68e-08	kg Sb eq/kg	-1.13781e-10	kg Sb eq	3.03799e-08
																																									Perlite	Resource / in ground	5.43026e-08	kg	3.88e-05	kg Sb eq/kg	2.10694e-12	kg Sb eq	-5.62561e-10
																																									Phosphorus, in ground	Resource / in ground	-0.0124	kg	6.21e-05	kg Sb eq/kg	-7.70296e-07	kg Sb eq	0.000205672
																																									Platinum, in ground	Resource / in ground	-1.34465e-07	kg	9.09	kg Sb eq/kg	-1.22229e-06	kg Sb eq	0.000326356
																																									Potassium, in ground	Resource / in ground	-0.00019	kg	9e-06	kg Sb eq/kg	-1.67453e-09	kg Sb eq	4.47106e-07
																																									Praseodymium, in ground	Resource / in ground	-3.43244e-08	kg	0.00057	kg Sb eq/kg	-1.95306e-11	kg Sb eq	5.21474e-09
																																									Rhenium, in ground	Resource / in ground	-2.18885e-07	kg	31.9	kg Sb eq/kg	-6.98242e-06	kg Sb eq	0.00186433
																																									Selenium, in ground	Resource / in ground	-0.00017	kg	7.35	kg Sb eq/kg	-0.00122	kg Sb eq	0.325745
																																									Silver, in ground	Resource / in ground	-2.43252e-05	kg	8.42	kg Sb eq/kg	-0.0002	kg Sb eq	0.0534007
																																									Sodium chloride	Resource / in ground	-0.15771	kg	5.56e-07	kg Sb eq/kg	-8.7684e-08	kg Sb eq	2.3412e-05
																																									Sodium sulphate, various forms	Resource / in ground	-0.00015	kg	9.92e-06	kg Sb eq/kg	-1.52356e-09	kg Sb eq	4.06796e-07
																																									Strontium, in ground	Resource / in ground	-1.2189e-06	kg	0.177	kg Sb eq/kg	-2.15745e-07	kg Sb eq	5.76047e-05
																																									Sulfur, in ground	Resource / in ground	-1.52605	kg	0.00039	kg Sb eq/kg	-0.0006	kg Sb eq	0.160202
																																									Talc	Resource / in ground	-1.1182e-05	kg	0.00118	kg Sb eq/kg	-1.31947e-08	kg Sb eq	3.52303e-06
																																									Tantalum, in ground	Resource / in ground	-4.05483e-08	kg	11.5	kg Sb eq/kg	-4.66306e-07	kg Sb eq	0.000124505
																																									Tellurium, in ground	Resource / in ground	-3.05403e-05	kg	7.21	kg Sb eq/kg	-0.00022	kg Sb eq	0.0587408
																																									Terbium, in ground	Resource / in ground	8.17788e-09	kg	0.00057	kg Sb eq/kg	4.65321e-12	kg Sb eq	-1.24242e-09
																																									Tin, in ground	Resource / in ground	-1.56886e-06	kg	0.115	kg Sb eq/kg	-1.80419e-07	kg Sb eq	4.81725e-05
																																									Titanium, in ground	Resource / in ground	-0.00058	kg	0.00152	kg Sb eq/kg	-8.82131e-07	kg Sb eq	0.000235532
																																									Uranium	Resource / in ground	-2.46164e-05	kg	0.201	kg Sb eq/kg	-4.94789e-06	kg Sb eq	0.0013211
																																									Vanadium, in ground	Resource / in ground	-4.18732e-08	kg	0.00493	kg Sb eq/kg	-2.06435e-10	kg Sb eq	5.51189e-08
																																									Yttrium, in ground	Resource / in ground	4.99759e-08	kg	0.816	kg Sb eq/kg	4.07804e-08	kg Sb eq	-1.08885e-05
																																									Zinc, in ground	Resource / in ground	-0.00972	kg	0.00365	kg Sb eq/kg	-3.54844e-05	kg Sb eq	0.00947447
																																									Zirconium, in ground	Resource / in ground	-8.20885e-05	kg	0.0164	kg Sb eq/kg	-1.34625e-06	kg Sb eq	0.000359454
																																															-0.00374527
																																									Arsenic	0	0
																																									Cobalt	0	0
																																									Copper	0	0
																																									Fluorspar	0	0
																																									Lithium	-0.00077	0.205593
																																									Molybdenum	-0.00015	0.0400506
																																									Nickel	-0.00049	0.130832
																																									Selenium	-0.00122	0.325745
																																									Silver	-0.0002	0.0534007
																																									Sulfur	-0.0006	0.160202
																																									Tellurium	-0.00022	0.0587408
																																									Other	-9.52663e-05	0.0254365
[truncated: 29 more columns]

## Sheet: Resume_SensAnal
	Results summary
			NaNMC			NaMVP			NaMMO			NaNMMT			NaPBA			LiNMC			LiFP
		per cell	Prod	Rec	Net	Prod	Rec	Net	Prod	Rec	Net	Prod	Rec	Net	Prod	Rec	Net	Prod	Rec	Net	Prod	Rec	Net
		AP	0.15678	-0.09782	0.05896	0.13554	-0.03407	0.10147	0.07892	-0.04618	0.03274	0.08394	-0.0532	0.03074	0.09139	-0.0449	0.04649	0.07144	-0.04759	0.02385	0.05301	-0.01838	0.03463	molc H+ eq
		GWP	13.7187	-5.05023	8.66843	14.2074	-1.31878	12.8887	8.28422	-1.00348	7.28074	8.01709	-2.11352	5.90357	13.878	-2.09008	11.7879	7.10008	-2.75495	4.34513	7.83497	-1.03389	6.80108	kg CO2 eq
		Htox	0.0183496	-0.0125722	0.00577738	0.0276206	-0.00067376	0.0269468	0.0027496	-0.000471621	0.00227797	0.00466717	-0.00240942	0.00225775	0.0043253	-0.00123758	0.00308772	0.0164886	-0.013465	0.00302355	0.0157769	-0.0116378	0.00413908	mCTUh
		RDP	0.00573	-0.00447	0.00126	0.00124	-0.00062	0.00062	0.00084	-0.00061	0.00023	0.00144	-0.00097	0.00047	0.00128	-0.00094	0.00034	0.00503	-0.00476	0.00027	0.00486	-0.00394	0.00092	kg Sb eq
		ODP	1.8274e-06	-6.35962e-07	1.19144e-06	1.23342e-06	-1.03138e-07	1.13028e-06	7.39456e-07	-1.50421e-07	5.89035e-07	7.37173e-07	-2.09503e-07	5.2767e-07	1.41684e-06	-1.17568e-07	1.29927e-06	7.8499e-07	-2.93987e-07	4.91003e-07	6.17554e-07	-4.56666e-08	5.71887e-07	kg CFC-11 eq
		PMF	0.01158	-0.00689	0.00469	0.0106	-0.00238	0.00822	0.00658	-0.00255	0.00403	0.00562	-0.00329	0.00233	0.00758	-0.00338	0.0042	0.00646	-0.00433	0.00213	0.00557	-0.00245	0.00312	kg PM2.5 eq
			NaNMC			NaMVP			NaMMO			NaNMMT			NaPBA			LiNMC			LiFP
		per kWh	Prod	Rec	Net	Prod	Rec	Net	Prod	Rec	Net	Prod	Rec	Net	Prod	Rec	Net	Prod	Rec	Net	Prod	Rec	Net
		AP	0.990288	-0.617872	0.372416	0.85528	-0.214987	0.640293	0.498575	-0.291741	0.206834	0.52978	-0.335767	0.194013	0.57323	-0.281628	0.291601	0.450816	-0.300313	0.150503	0.335513	-0.116331	0.219181	molc H+ eq
		GWP	86.6528	-31.8994	54.7534	89.6514	-8.32172	81.3297	52.3354	-6.33946	45.9959	50.5992	-13.3393	37.2599	87.0473	-13.1097	73.9376	44.8044	-17.3849	27.4196	49.5894	-6.54373	43.0456	kg CO2 eq
		Htox	0.115904	-0.0794112	0.0364924	0.174291	-0.00425154	0.170039	0.0173705	-0.00297945	0.014391	0.0294564	-0.0152069	0.0142496	0.0271298	-0.00776255	0.0193672	0.10405	-0.08497	0.0190799	0.0998554	-0.0736582	0.0261972	mCTUh
		RDP	0.0361931	-0.0282344	0.00795869	0.00782461	-0.0039123	0.0039123	0.00530668	-0.00385366	0.00145302	0.00908844	-0.00612207	0.00296637	0.0080286	-0.005896	0.0021326	0.0317414	-0.0300376	0.00170381	0.0307601	-0.0249372	0.0058229	kg Sb eq
		ODP	1.15426e-05	-4.017e-06	7.52562e-06	7.78309e-06	-6.50818e-07	7.13227e-06	4.67149e-06	-9.50281e-07	3.72121e-06	4.6526e-06	-1.32226e-06	3.33034e-06	8.88691e-06	-7.37427e-07	8.14948e-06	4.95361e-06	-1.85518e-06	3.09843e-06	3.90864e-06	-2.89035e-07	3.61961e-06	kg CFC-11 eq
		PMF	0.0731441	-0.0435201	0.029624	0.0668878	-0.0150182	0.0518696	0.041569	-0.0161096	0.0254594	0.0354702	-0.0207646	0.0147056	0.0475444	-0.0212005	0.0263438	0.0407653	-0.0273241	0.0134412	0.0352538	-0.0155066	0.0197472	kg PM2.5 eq
			-0.934023			-1.00095			-0.168084			-0.129334			-0.942827			0			-0.106796
	Sensitivity Analysis
ENERGY DENSITY			Energy density	136.31	152.467	157.08	171.91	124.1	272.115	197.419	Wh/kg
	GWP		Production - GWP									Net - GWP													HTP
			Energy density - absolute values	NaNMC	NaMVP	NaMMO	NaNMMT	NaPBA	LiNMC	LiFP		Energy density - absolute values	NaNMC	NaMVP	NaMMO	NaNMMT	NaPBA	LiNMC	LiFP								Energy density - absolute values	NaNMC	NaMVP	NaMMO	NaNMMT	NaPBA	LiNMC	LiFP			NaNMC	NaMVP	NaMMO	NaNMMT	NaPBA	LiNMC	LiFP
			100	118.116	136.689	82.2084	86.9851	108.026	121.92	97.8987		100	74.6344	124.001	72.2504	64.0535	91.7565	74.6127	84.9801								50	0.157988	0.265736	0.0272856	0.0506386	0.0336681	0.283135	0.197133			0.0497427	0.259254	0.0226055	0.0244965	0.0240347	0.0519191	0.0517182
			110	107.379	124.263	74.7349	79.0774	98.2052	110.836	88.9988		110	67.8495	112.728	65.6821	58.2305	83.415	67.8297	77.2547								60	0.143626	0.241578	0.0248051	0.0460351	0.0306073	0.257395	0.179212			0.0452207	0.235685	0.0205504	0.0222695	0.0218497	0.0471992	0.0470165
			120	98.4304	113.907	68.507	72.4876	90.0214	101.6	81.5822		120	62.1953	103.334	60.2086	53.3779	76.4638	62.1773	70.8168								70	0.131657	0.221447	0.022738	0.0421988	0.0280567	0.235946	0.164278			0.0414523	0.216045	0.0188379	0.0204137	0.0200289	0.0432659	0.0430985
			130	90.8588	105.145	63.2372	66.9116	83.0967	93.7842	75.3067		130	57.4111	95.3854	55.5772	49.2719	70.582	57.3944	65.3693								80	0.121529	0.204412	0.0209889	0.0389528	0.0258985	0.217796	0.151641			0.0382636	0.199426	0.0173888	0.0188434	0.0184882	0.0399378	0.0397832
			140	84.3689	97.635	58.7203	62.1322	77.1612	87.0854	69.9276		140	53.3103	88.5722	51.6074	45.7525	65.5404	53.2948	60.7001								90	0.112849	0.189811	0.0194897	0.0361704	0.0240486	0.202239	0.14081			0.0355305	0.185181	0.0161468	0.0174975	0.0171677	0.0370851	0.0369415
			150	78.7443	91.126	54.8056	57.9901	72.0171	81.2797	65.2658		150	49.7563	82.6674	48.1669	42.7023	61.171	49.7418	56.6534								100	0.105325	0.177157	0.0181904	0.0337591	0.0224454	0.188757	0.131422			0.0331618	0.172836	0.0150703	0.016331	0.0160231	0.0346127	0.0344788
			160	73.8228	85.4306	51.3802	54.3657	67.5161	76.1997	61.1867		160	46.6465	77.5007	45.1565	40.0334	57.3478	46.6329	53.1126								110	0.0987426	0.166085	0.0170535	0.0316491	0.0210425	0.176959	0.123208			0.0310892	0.162034	0.0141284	0.0153103	0.0150217	0.0324494	0.0323239
			170	69.4803	80.4053	48.3579	51.1677	63.5445	71.7174	57.5875		170	43.9026	72.9418	42.5002	37.6785	53.9744	43.8898	49.9883								120	0.0929342	0.156315	0.0160503	0.0297874	0.0198047	0.16655	0.115961			0.0292604	0.152502	0.0132973	0.0144097	0.0141381	0.0305406	0.0304225
			180	65.6203	75.9383	45.6713	48.3251	60.0143	67.7331	54.3882		180	41.4636	68.8895	40.1391	35.5853	50.9759	41.4515	47.2112								130	0.0877712	0.147631	0.0151587	0.0281326	0.0187045	0.157297	0.109519			0.0276349	0.14403	0.0125586	0.0136091	0.0133526	0.0288439	0.0287323
			190	62.1666	71.9416	43.2676	45.7816	56.8556	64.1682	51.5256		190	39.2813	65.2637	38.0265	33.7124	48.2929	39.2698	44.7264								140	0.0831516	0.139861	0.0143608	0.0266519	0.01772	0.149018	0.103754			0.0261804	0.136449	0.0118976	0.0128929	0.0126499	0.0273258	0.0272201
			200	59.0582	68.3445	41.1042	43.4926	54.0128	60.9598	48.9493		200	37.3172	62.0005	36.1252	32.0268	45.8783	37.3064	42.4901								150	0.078994	0.132868	0.0136428	0.0253193	0.016834	0.141567	0.0985667			0.0248714	0.129627	0.0113027	0.0122482	0.0120174	0.0259595	0.0258591
			210	56.2459	65.09	39.1468	41.4215	51.4408	58.0569	46.6184		210	35.5402	59.0481	34.4049	30.5017	43.6936	35.5299	40.4667								160	0.0752324	0.126541	0.0129931	0.0241136	0.0160324	0.134826	0.093873			0.023687	0.123454	0.0107645	0.011665	0.0114451	0.0247234	0.0246277
			220	53.6893	62.1313	37.3674	39.5387	49.1026	55.418	44.4994		220	33.9247	56.3641	32.8411	29.1152	41.7075	33.9149	38.6273								170	0.0718128	0.120789	0.0124025	0.0230176	0.0153037	0.128698	0.0896061			0.0226103	0.117843	0.0102752	0.0111348	0.0109249	0.0235996	0.0235083
			230	51.355	59.43	35.7428	37.8196	46.9677	53.0085	42.5646		230	32.4497	53.9135	31.4132	27.8494	39.8942	32.4403	36.9479								180	0.0686905	0.115537	0.0118633	0.0220168	0.0146383	0.123102	0.0857101			0.0216273	0.112719	0.00982846	0.0106506	0.0104499	0.0225735	0.0224862
			240	49.2152	56.9537	34.2535	36.2438	45.0107	50.7998	40.7911		240	31.0977	51.6671	30.1043	26.689	38.2319	31.0886	35.4084								190	0.0658284	0.110723	0.011369	0.0210994	0.0140284	0.117973	0.0821389			0.0207261	0.108022	0.00941894	0.0102069	0.0100145	0.021633	0.0215492
			250	47.2466	54.6756	32.8833	34.794	43.2103	48.7678	39.1595		250	29.8538	49.6004	28.9001	25.6214	36.7026	29.8451	33.9921								200	0.0631952	0.106294	0.0109142	0.0202554	0.0134672	0.113254	0.0788533			0.0198971	0.103702	0.00904218	0.00979858	0.00961389	0.0207676	0.0206873
			260	45.4294	52.5727	31.6186	33.4558	41.5483	46.8921	37.6533		260	28.7055	47.6927	27.7886	24.636	35.291	28.6972	32.6847								210	0.0607647	0.102206	0.0104945	0.0194764	0.0129493	0.108898	0.0758205			0.0191318	0.099713	0.0086944	0.00942171	0.00924412	0.0199689	0.0198916
			270	43.7468	50.6255	30.4475	32.2167	40.0095	45.1554	36.2588		270	27.6424	45.9263	26.7594	23.7235	33.9839	27.6343	31.4741								220	0.0585141	0.0984207	0.0101058	0.018755	0.0124696	0.104865	0.0730123			0.0184232	0.0960199	0.00837239	0.00907276	0.00890175	0.0192293	0.0191549
			280	42.1844	48.8175	29.3601	31.0661	38.5806	43.5427	34.9638		280	26.6551	44.2861	25.8037	22.8763	32.7702	26.6474	30.35								230	0.0564243	0.0949057	0.00974485	0.0180852	0.0120243	0.10112	0.0704048			0.0177653	0.0925906	0.00807338	0.00874873	0.00858383	0.0185425	0.0184708
			290	40.7298	47.1341	28.3477	29.9949	37.2502	42.0412	33.7582		290	25.736	42.759	24.9139	22.0874	31.6402	25.7285	29.3035								240	0.0544787	0.0916331	0.00940882	0.0174616	0.0116097	0.0976327	0.067977			0.0171527	0.0893979	0.00779498	0.00844705	0.00828783	0.0179031	0.0178339
			300	39.3722	45.563	27.4028	28.995	36.0086	40.6398	32.6329		300	24.8781	41.3337	24.0835	21.3512	30.5855	24.8709	28.3267								250	0.0526627	0.0885787	0.00909519	0.0168795	0.0112227	0.0943783	0.0657111			0.0165809	0.0864179	0.00753515	0.00816549	0.00801157	0.0173064	0.0172394
			Wh/kg
		Energy density - relative values (relative to NMC)
			EngDens rel to NMC									EngDens rel to NMC															EngDens rel to NMC									EngDens rel to NMC
			0.9	96.2809	99.6127	58.1504	56.2213	96.7192	49.7827	55.0993		0.9	60.8372	90.3663	51.1065	41.3999	82.1529	30.4662	47.8285								0.9	0.128782	0.193656	0.0193006	0.0327294	0.0301442	0.115611	0.11095		0.9	0.0405471	0.188932	0.01599	0.0158329	0.0215191	0.0211998	0.029108
			0.95	91.2135	94.3699	55.0898	53.2623	91.6287	47.1626	52.1993		0.95	57.6352	85.6102	48.4167	39.2209	77.829	28.8627	45.3112								0.95	0.122004	0.183464	0.0182847	0.0310068	0.0285577	0.109526	0.105111		0.95	0.038413	0.178989	0.0151485	0.0149995	0.0203865	0.0200841	0.027576
			1	86.6528	89.6514	52.3354	50.5992	87.0473	44.8044	49.5894		1	54.7534	81.3297	45.9959	37.2599	73.9376	27.4196	43.0456								1	0.115904	0.174291	0.0173705	0.0294564	0.0271298	0.10405	0.0998554		1	0.0364924	0.170039	0.014391	0.0142496	0.0193672	0.0190799	0.0261972
			1.05	82.5265	85.3823	49.8432	48.1897	82.9022	42.6709	47.228		1.05	52.1461	77.4568	43.8056	35.4856	70.4168	26.1139	40.9958								1.05	0.110384	0.165991	0.0165433	0.0280538	0.0258379	0.0990951	0.0951004		1.05	0.0347546	0.161942	0.0137058	0.013571	0.018445	0.0181713	0.0249497
			1.1	78.7753	81.5013	47.5776	45.9993	79.1339	40.7313	45.0812		1.1	49.7759	73.9361	41.8144	33.8726	67.216	24.9269	39.1324								1.1	0.105367	0.158446	0.0157914	0.0267786	0.0246634	0.0945908	0.0907777		1.1	0.0331749	0.154581	0.0130828	0.0129542	0.0176066	0.0173453	0.0238156
			1.15	75.3503	77.9577	45.509	43.9993	75.6933	38.9604	43.1212		1.15	47.6117	70.7215	39.9964	32.3999	64.2936	23.8431	37.431								1.15	0.100786	0.151557	0.0151048	0.0256143	0.0235911	0.0904781	0.0868308		1.15	0.0317325	0.14786	0.012514	0.0123909	0.0168411	0.0165912	0.0227802
			1.2	72.2107	74.7095	43.6128	42.166	72.5394	37.337	41.3245		1.2	45.6279	67.7747	38.3299	31.0499	61.6147	22.8496	35.8714								1.2	0.0965863	0.145242	0.0144754	0.024547	0.0226081	0.0867082	0.0832129		1.2	0.0304103	0.141699	0.0119925	0.0118746	0.0161394	0.0158999	0.021831
			1.25	69.3223	71.7211	41.8683	40.4793	69.6378	35.8436	39.6715		1.25	43.8028	65.0637	36.7967	29.8079	59.1501	21.9357	34.4365								1.25	0.0927228	0.139433	0.0138964	0.0235652	0.0217038	0.0832399	0.0798844		1.25	0.0291939	0.136031	0.0115128	0.0113997	0.0154938	0.0152639	0.0209578
			1.3	66.656	68.9626	40.258	38.9224	66.9595	34.465	38.1457		1.3	42.118	62.5613	35.3815	28.6614	56.8751	21.092	33.112								1.3	0.0891566	0.13407	0.0133619	0.0226588	0.0208691	0.0800383	0.0768119		1.3	0.028071	0.130799	0.01107	0.0109612	0.0148979	0.0146768	0.0201517
			1.35	64.1873	66.4084	38.7669	37.4809	64.4795	33.1885	36.7329		1.35	40.5581	60.2442	34.071	27.5999	54.7686	20.3108	31.8857								1.35	0.0858545	0.129104	0.012867	0.0218196	0.0200961	0.0770739	0.073967		1.35	0.0270314	0.125955	0.01066	0.0105552	0.0143461	0.0141332	0.0194053
			1.4	61.8949	64.0367	37.3824	36.1423	62.1766	32.0032	35.421		1.4	39.1096	58.0926	32.8542	26.6142	52.8126	19.5854	30.7469								1.4	0.0827882	0.124493	0.0124075	0.0210403	0.0193784	0.0743213	0.0713253		1.4	0.026066	0.121456	0.0102793	0.0101783	0.0138337	0.0136285	0.0187123
			1.45	59.7606	61.8286	36.0933	34.896	60.0326	30.8996	34.1996		1.45	37.761	56.0894	31.7213	25.6965	50.9914	18.91	29.6866								1.45	0.0799335	0.1202	0.0119797	0.0203148	0.0187102	0.0717585	0.0688658		1.45	0.0251671	0.117268	0.00992486	0.00982729	0.0133567	0.0131585	0.018067
			1.5	57.7685	59.7676	34.8902	33.7328	58.0315	29.8696	33.0596		1.5	36.5023	54.2198	30.6639	24.8399	49.2917	18.2797	28.6971								1.5	0.077269	0.116194	0.0115803	0.0196376	0.0180865	0.0693666	0.0665703		1.5	0.0243282	0.113359	0.00959403	0.00949971	0.0129115	0.0127199	0.0174648
			1.55	55.905	57.8396	33.7647	32.6446	56.1595	28.9061	31.9931		1.55	35.3248	52.4708	29.6748	24.0386	47.7017	17.69	27.7714								1.55	0.0747765	0.112446	0.0112068	0.0190042	0.0175031	0.0671289	0.0644229		1.55	0.0235435	0.109703	0.00928454	0.00919327	0.012495	0.0123096	0.0169014
			1.6	54.158	56.0321	32.7096	31.6245	54.4046	28.0028	30.9934		1.6	34.2209	50.831	28.7474	23.2874	46.211	17.1372	26.9035								1.6	0.0724397	0.108932	0.0108566	0.0184103	0.0169561	0.0650311	0.0624097		1.6	0.0228077	0.106274	0.0089944	0.00890598	0.0121045	0.0119249	0.0163732
			1.65	52.5169	54.3342	31.7184	30.6662	52.7559	27.1542	30.0542		1.65	33.1839	49.2907	27.8763	22.5817	44.8107	16.6179	26.0883								1.65	0.0702446	0.105631	0.0105276	0.0178524	0.0164423	0.0630605	0.0605185		1.65	0.0221166	0.103054	0.00872185	0.0086361	0.0117377	0.0115635	0.0158771
			1.7	50.9722	52.7361	30.7855	29.7642	51.2043	26.3556	29.1702		1.7	32.2079	47.841	27.0564	21.9176	43.4927	16.1292	25.321								1.7	0.0681785	0.102524	0.0102179	0.0173273	0.0159587	0.0612058	0.0587385		1.7	0.0214661	0.100023	0.00846532	0.0083821	0.0113925	0.0112234	0.0154101
			1.75	49.5159	51.2294	29.9059	28.9138	49.7413	25.6025	28.3368		1.75	31.2877	46.4741	26.2834	21.2914	42.2501	15.6683	24.5975								1.75	0.0662306	0.0995946	0.009926	0.0168323	0.0155027	0.059457	0.0570603		1.75	0.0208528	0.0971652	0.00822345	0.00814261	0.011067	0.0109028	0.0149698
			1.8	48.1405	49.8063	29.0752	28.1107	48.3596	24.8914	27.5496		1.8	30.4186	45.1832	25.5533	20.6999	41.0764	15.2331	23.9142								1.8	0.0643908	0.0968281	0.00965028	0.0163647	0.0150721	0.0578055	0.0554752		1.8	0.0202735	0.0944662	0.00799502	0.00791643	0.0107596	0.0105999	0.014554
			1.85	46.8394	48.4602	28.2894	27.3509	47.0526	24.2186	26.8051		1.85	29.5965	43.962	24.8626	20.1405	39.9663	14.8214	23.2679								1.85	0.0626506	0.0942112	0.00938946	0.0159224	0.0146647	0.0562432	0.0539759		1.85	0.0197256	0.091913	0.00777894	0.00770247	0.0104688	0.0103134	0.0141606
			1.9	45.6067	47.1849	27.5449	26.6311	45.8144	23.5813	26.0997		1.9	28.8176	42.8051	24.2084	19.6105	38.9145	14.4314	22.6556								1.9	0.0610019	0.0917319	0.00914237	0.0155034	0.0142788	0.0547631	0.0525555		1.9	0.0192065	0.0894943	0.00757423	0.00749977	0.0101933	0.010042	0.013788
			1.95	44.4373	45.9751	26.8386	25.9483	44.6396	22.9766	25.4304		1.95	28.0787	41.7075	23.5876	19.1076	37.9167	14.0613	22.0747								1.95	0.0594377	0.0893798	0.00890795	0.0151059	0.0139127	0.0533589	0.0512079		1.95	0.018714	0.0871995	0.00738002	0.00730747	0.00993191	0.00978454	0.0134345
			2	43.3264	44.8257	26.1677	25.2996	43.5236	22.4022	24.7947		2	27.3767	40.6648	22.9979	18.6299	36.9688	13.7098	21.5228								2	0.0579518	0.0871453	0.00868525	0.0147282	0.0135649	0.0520249	0.0499277		2	0.0182462	0.0850195	0.00719552	0.00712479	0.00968361	0.00953993	0.0130986
ENERGY DENSITY			Energy density	136.31	152.467	157.08	171.91	124.1	272.115	197.419	Wh/kg
	ADP		Production - ADP									Net - ADP													AP
			Energy density - absolute values	NaNMC	NaMVP	NaMMO	NaNMMT	NaPBA	LiNMC	LiFP		Energy density - absolute values	NaNMC	NaMVP	NaMMO	NaNMMT	NaPBA	LiNMC	LiFP								Energy density - absolute values	NaNMC	NaMVP	NaMMO	NaNMMT	NaPBA	LiNMC	LiFP		Energy density - absolute values	NaNMC	NaMVP	NaMMO	NaNMMT	NaPBA	LiNMC	LiFP
			100	0.0493348	0.01193	0.00833573	0.0156239	0.00996349	0.086373	0.0607262		100	0.0108485	0.00596498	0.0022824	0.00509948	0.00264655	0.00463632	0.0114955								50	1.34986	0.976236	0.584991	1.47031	-0.266799	1.74233	0.984281		50	0.50764	0.976236	0.324895	0.333528	0.361877	0.409542	0.432705
			110	0.0448498	0.0108454	0.00757794	0.0142036	0.00905772	0.0785209	0.0552056		110	0.00986226	0.00542271	0.00207491	0.00463589	0.00240596	0.00421484	0.0104504								60	1.22715	-0.856411	0.53181	1.33665	-0.242545	1.58394	0.894801		60	0.461491	0.887488	0.295359	0.303207	0.328979	0.372311	0.393368
			120	0.0411123	0.00994163	0.00694644	0.01302	0.00830291	0.0719775	0.0506051		120	0.00904041	0.00497082	0.001902	0.00424957	0.00220546	0.0038636	0.00957957								70	1.12488	-0.785044	0.487493	1.22526	-0.222333	1.45194	0.820234		70	0.423034	0.81353	0.270746	0.27794	0.301564	0.341285	0.360588
			130	0.0379498	0.00917689	0.0064121	0.0120184	0.00766423	0.0664408	0.0467124		130	0.00834499	0.00458845	0.00175569	0.00392268	0.00203581	0.0035664	0.00884268								80	1.03836	-0.724656	0.449993	1.13101	-0.20523	1.34025	0.757139		80	0.390493	0.750951	0.249919	0.25656	0.278367	0.315032	0.33285
			140	0.0352391	0.0085214	0.00595409	0.01116	0.00711678	0.061695	0.0433758		140	0.00774892	0.0042607	0.00163029	0.00364249	0.0018904	0.00331166	0.00821106								90	0.964187	-0.672894	0.417851	1.05022	-0.190571	1.24452	0.703058		90	0.3626	0.697312	0.232068	0.238234	0.258484	0.29253	0.309075
			150	0.0328899	0.00795331	0.00555715	0.010416	0.00664233	0.057582	0.0404841		150	0.00723233	0.00397665	0.0015216	0.00339965	0.00176437	0.00309088	0.00766366								100	0.899908	-0.628035	0.389994	0.980209	-0.177866	1.16155	0.656187		100	0.338427	0.650824	0.216597	0.222352	0.241252	0.273028	0.28847
			160	0.0308342	0.00745622	0.00520983	0.00976497	0.00622718	0.0539831	0.0379538		160	0.00678031	0.00372811	0.0014265	0.00318718	0.0016541	0.0028977	0.00718468								110	0.843664	-0.588783	0.36562	0.918946	-0.16675	1.08896	0.615175		110	0.317275	0.610148	0.203059	0.208455	0.226173	0.255964	0.270441
			170	0.0290205	0.00701762	0.00490337	0.00919056	0.00586088	0.0508076	0.0357213		170	0.00638146	0.00350881	0.00134259	0.0029997	0.0015568	0.00272725	0.00676205								120	0.794036	-0.554148	0.344112	0.86489	-0.156941	1.0249	0.578989		120	0.298612	0.574257	0.191115	0.196193	0.212869	0.240907	0.254532
			180	0.0274082	0.00662776	0.00463096	0.00867997	0.00553527	0.047985	0.0337368		180	0.00602694	0.00331388	0.001268	0.00283305	0.00147031	0.00257574	0.00638638								130	0.749923	-0.523362	0.324995	0.816841	-0.148222	0.967962	0.546823		130	0.282022	0.542353	0.180497	0.185293	0.201043	0.227523	0.240392
			190	0.0259657	0.00627893	0.00438723	0.00822313	0.00524394	0.0454595	0.0319611		190	0.00570973	0.00313946	0.00120126	0.00268394	0.00139292	0.00244017	0.00605026								140	0.710454	-0.495817	0.30789	0.773849	-0.140421	0.917016	0.518042		140	0.267179	0.513809	0.170997	0.175541	0.190462	0.215548	0.22774
			200	0.0246674	0.00596498	0.00416787	0.00781197	0.00498175	0.0431865	0.0303631		200	0.00542424	0.00298249	0.0011412	0.00254974	0.00132328	0.00231816	0.00574774								150	0.674931	-0.471026	0.292496	0.735157	-0.1334	0.871166	0.49214		150	0.25382	0.488118	0.162448	0.166764	0.180939	0.204771	0.216353
			210	0.0234928	0.00568093	0.0039694	0.00743997	0.00474452	0.04113	0.0289172		210	0.00516595	0.00284047	0.00108686	0.00242832	0.00126026	0.00220777	0.00547404								160	0.642791	-0.448596	0.278567	0.700149	-0.127047	0.829682	0.468705		160	0.241734	0.464874	0.154712	0.158823	0.172323	0.19502	0.20605
			220	0.0224249	0.00542271	0.00378897	0.00710179	0.00452886	0.0392605	0.0276028		220	0.00493113	0.00271135	0.00103746	0.00231795	0.00120298	0.00210742	0.00522522								170	0.613574	-0.428206	0.265905	0.668324	-0.121272	0.791969	0.4474		170	0.230746	0.443744	0.14768	0.151604	0.16449	0.186155	0.196684
			230	0.0214499	0.00518694	0.00362423	0.00679302	0.00433195	0.0375535	0.0264027		230	0.00471673	0.00259347	0.000992349	0.00221717	0.00115068	0.00201579	0.00499804								180	0.586897	-0.409588	0.254344	0.639267	-0.116	0.757535	0.427948		180	0.220713	0.424451	0.141259	0.145012	0.157338	0.178062	0.188133
			240	0.0205562	0.00497082	0.00347322	0.00650998	0.00415146	0.0359887	0.0253026		240	0.0045202	0.00248541	0.000951001	0.00212478	0.00110273	0.0019318	0.00478979								190	0.562442	-0.392522	0.243746	0.612631	-0.111166	0.725971	0.410117		190	0.211517	0.406765	0.135373	0.13897	0.150782	0.170642	0.180294
			250	0.0197339	0.00477198	0.00333429	0.00624958	0.0039854	0.0345492	0.0242905		250	0.0043394	0.00238599	0.000912961	0.00203979	0.00105862	0.00185453	0.00459819								200	0.539945	-0.376821	0.233996	0.588125	-0.10672	0.696933	0.393712		200	0.203056	0.390495	0.129958	0.133411	0.144751	0.163817	0.173082
			260	0.0189749	0.00458845	0.00320605	0.00600921	0.00383211	0.0332204	0.0233562		260	0.0041725	0.00229422	0.000877847	0.00196134	0.00101791	0.0017832	0.00442134								210	0.519178	-0.362328	0.224997	0.565505	-0.102615	0.670127	0.378569		210	0.195246	0.375475	0.12496	0.12828	0.139184	0.157516	0.166425
			270	0.0182721	0.0044185	0.00308731	0.00578665	0.00369018	0.03199	0.0224912		270	0.00401796	0.00220925	0.000845334	0.0018887	0.000980205	0.00171716	0.00425759								220	0.499949	-0.348908	0.216663	0.54456	-0.0988146	0.645308	0.364548		220	0.188015	0.361569	0.120332	0.123529	0.134029	0.151682	0.160261
			280	0.0176196	0.0042607	0.00297705	0.00557998	0.00355839	0.0308475	0.0216879		280	0.00387446	0.00213035	0.000815144	0.00182124	0.000945198	0.00165583	0.00410553								230	0.482094	-0.336447	0.208925	0.525112	-0.0952855	0.622261	0.351529		230	0.1813	0.348656	0.116034	0.119117	0.129242	0.146265	0.154538
			290	0.017012	0.00411378	0.00287439	0.00538757	0.00343569	0.0297838	0.0209401		290	0.00374086	0.00205689	0.000787035	0.00175844	0.000912605	0.00159873	0.00396396								240	0.46547	-0.324846	0.201721	0.507005	-0.0919998	0.600804	0.339407		240	0.175048	0.336633	0.112033	0.11501	0.124785	0.141221	0.149209
			300	0.0164449	0.00397665	0.00277858	0.00520798	0.00332116	0.028791	0.0202421		300	0.00361616	0.00198833	0.000760801	0.00169983	0.000882184	0.00154544	0.00383183								250	0.449954	-0.314017	0.194997	0.490104	-0.0889331	0.580777	0.328094		250	0.169213	0.325412	0.108298	0.111176	0.120626	0.136514	0.144235
			Wh/kg
		Energy density - relative values (relative to NMC)																																		Net - ADP
			EngDens rel to NMC									EngDens rel to NMC																								Energy density - absolute values	Na-NMC	Na-NMOaqu	Na-NMO	Na-NMMT	Li-NMC111	Li-NMC622	Li-LFP
			0.9	0.0402145	0.00869401	0.00589631	0.0100983	0.00892067	0.0352682	0.0341779		0.9	0.00884299	0.004347	0.00161447	0.00329596	0.00236955	0.00189312	0.00646988																	0.9	0.413796	0.711436	0.229816	0.21557	0.324001	0.167226	0.243535
			0.95	0.038098	0.00823643	0.00558598	0.00956678	0.00845116	0.033412	0.032379		0.95	0.00837757	0.00411822	0.00152949	0.00312249	0.00224484	0.00179349	0.00612936																	0.95	0.392017	0.673992	0.21772	0.204224	0.306949	0.158425	0.230717
			1	0.0361931	0.00782461	0.00530668	0.00908844	0.0080286	0.0317414	0.0307601		1	0.00795869	0.0039123	0.00145302	0.00296637	0.0021326	0.00170381	0.0058229																	1	0.372416	0.640293	0.206834	0.194013	0.291601	0.150503	0.219181
			1.05	0.0344696	0.00745201	0.00505398	0.00865565	0.00764629	0.0302299	0.0292953		1.05	0.0075797	0.003726	0.00138383	0.00282511	0.00203105	0.00162268	0.00554561																	1.05	0.354682	0.609803	0.196985	0.184774	0.277716	0.143337	0.208744
			1.1	0.0329028	0.00711328	0.00482425	0.00826222	0.00729873	0.0288558	0.0279637		1.1	0.00723517	0.00355664	0.00132093	0.0026967	0.00193872	0.00154892	0.00529354																	1.1	0.33856	0.582084	0.188031	0.176375	0.265092	0.136821	0.199256
			1.15	0.0314722	0.00680401	0.0046145	0.00790299	0.00698139	0.0276012	0.0267479		1.15	0.0069206	0.003402	0.0012635	0.00257945	0.00185443	0.00148158	0.00506339																	1.15	0.32384	0.556776	0.179856	0.168707	0.253566	0.130872	0.190593
			1.2	0.0301609	0.00652051	0.00442223	0.0075737	0.0066905	0.0264512	0.0256334		1.2	0.00663224	0.00326025	0.00121085	0.00247197	0.00177716	0.00141984	0.00485241																	1.2	0.310347	0.533577	0.172362	0.161677	0.243001	0.125419	0.182651
			1.25	0.0289545	0.00625969	0.00424534	0.00727075	0.00642288	0.0253931	0.0246081		1.25	0.00636695	0.00312984	0.00116242	0.00237309	0.00170608	0.00136305	0.00465832																	1.25	0.297933	0.512234	0.165467	0.15521	0.233281	0.120403	0.175345
			1.3	0.0278408	0.00601893	0.00408206	0.00699111	0.00617585	0.0244164	0.0236616		1.3	0.00612207	0.00300946	0.00111771	0.00228182	0.00164046	0.00131062	0.00447915																	1.3	0.286474	0.492533	0.159103	0.149241	0.224309	0.115772	0.168601
			1.35	0.0268097	0.00579601	0.00393087	0.00673218	0.00594711	0.0235121	0.0227852		1.35	0.00589533	0.002898	0.00107631	0.00219731	0.0015797	0.00126208	0.00431326																	1.35	0.275864	0.474291	0.15321	0.143713	0.216001	0.111484	0.162357
			1.4	0.0258522	0.00558901	0.00379049	0.00649174	0.00573472	0.0226724	0.0219715		1.4	0.00568478	0.0027945	0.00103787	0.00211883	0.00152328	0.00121701	0.00415921																	1.4	0.266012	0.457352	0.147739	0.138581	0.208287	0.107502	0.156558
			1.45	0.0249607	0.00539628	0.00365978	0.00626789	0.00553697	0.0218906	0.0212138		1.45	0.00548875	0.00269814	0.00100208	0.00204577	0.00147076	0.00117504	0.00401579																	1.45	0.256839	0.441581	0.142644	0.133802	0.201104	0.103795	0.15116
			1.5	0.0241287	0.00521641	0.00353779	0.00605896	0.0053524	0.0211609	0.0205067		1.5	0.00530579	0.0026082	0.00096868	0.00197758	0.00142173	0.00113587	0.00388193																	1.5	0.248277	0.426862	0.137889	0.129342	0.194401	0.100336	0.146121
			1.55	0.0233504	0.00504813	0.00342366	0.00586351	0.00517974	0.0204783	0.0198452		1.55	0.00513464	0.00252407	0.000937432	0.00191378	0.00137587	0.00109923	0.00375671																	1.55	0.240268	0.413092	0.133441	0.12517	0.18813	0.0970989	0.141407
			1.6	0.0226207	0.00489038	0.00331667	0.00568027	0.00501788	0.0198384	0.019225		1.6	0.00497418	0.00244519	0.000908137	0.00185398	0.00133287	0.00106488	0.00363931																	1.6	0.23276	0.400183	0.129271	0.121258	0.182251	0.0940646	0.136988
			1.65	0.0219352	0.00474219	0.00321617	0.00550814	0.00486582	0.0192372	0.0186425		1.65	0.00482345	0.00237109	0.000880618	0.0017978	0.00129248	0.00103261	0.00352903																	1.65	0.225707	0.388056	0.125354	0.117584	0.176728	0.0912142	0.132837
			1.7	0.02129	0.00460271	0.00312158	0.00534614	0.00472271	0.0186714	0.0180942		1.7	0.00468158	0.00230136	0.000854717	0.00174492	0.00125447	0.00100224	0.00342523																	1.7	0.219068	0.376643	0.121667	0.114125	0.17153	0.0885314	0.12893
			1.75	0.0206818	0.0044712	0.00303239	0.00519339	0.00458777	0.0181379	0.0175772		1.75	0.00454782	0.0022356	0.000830297	0.00169507	0.00121863	0.000973607	0.00332737																	1.75	0.212809	0.365882	0.118191	0.110865	0.166629	0.0860019	0.125247
			1.8	0.0201073	0.004347	0.00294816	0.00504913	0.00446033	0.0176341	0.0170889		1.8	0.00442149	0.0021735	0.000807233	0.00164798	0.00118478	0.000946562	0.00323494																	1.8	0.206898	0.355718	0.114908	0.107785	0.162001	0.083613	0.121767
			1.85	0.0195638	0.00422952	0.00286848	0.00491267	0.00433978	0.0171575	0.0166271		1.85	0.00430199	0.00211476	0.000785416	0.00160344	0.00115276	0.000920979	0.00314751																	1.85	0.201306	0.346104	0.111802	0.104872	0.157622	0.0813532	0.118476
			1.9	0.019049	0.00411822	0.00279299	0.00478339	0.00422558	0.016706	0.0161895		1.9	0.00418878	0.00205911	0.000764747	0.00156124	0.00112242	0.000896743	0.00306468																	1.9	0.196008	0.336996	0.10886	0.102112	0.153474	0.0792123	0.115359
			1.95	0.0185606	0.00401262	0.00272137	0.00466074	0.00411723	0.0162776	0.0157744		1.95	0.00408138	0.00200631	0.000745138	0.00152121	0.00109364	0.00087375	0.0029861																	1.95	0.190983	0.328355	0.106069	0.0994938	0.149539	0.0771812	0.112401
			2	0.0180965	0.0039123	0.00265334	0.00454422	0.0040143	0.0158707	0.01538		2	0.00397934	0.00195615	0.00072651	0.00148318	0.0010663	0.000851906	0.00291145																	2	0.186208	0.320146	0.103417	0.0970064	0.145801	0.0752517	0.109591
			3	6	9	12	15	18
	Use phase	NaNMC	NaMVP	NaMMO	NaNMMT	NaPBA	LiNMC	LiFP
RECYCLING RATE			Rec Rate	136.31	152.467	157.08	171.91	124.1	272.115	197.419	Wh/kg
			GWP									ADP
			Energy density - absolute values	NaNMC	NaMVP	NaMMO	NaNMMT	NaPBA	LiNMC	LiFP		Energy density - absolute values	NaNMC	NaMVP	NaMMO	NaNMMT	NaPBA	LiNMC	LiFP
			1	54.7534	81.3297	45.9959	37.2599	73.9376	27.4196	43.0456		1	0.00795869	0.0039123	0.00145302	0.00296637	0.0021326	0.00170381	0.0058229
			0.9	57.9434	82.1618	46.6298	38.5938	75.2486	29.1581	43.7		0.9	0.0107821	0.00430353	0.00183839	0.00357857	0.0027222	0.00470757	0.00831661
			0.8	61.1333	82.994	47.2638	39.9277	76.5595	30.8965	44.3544		0.8	0.0136056	0.00469477	0.00222375	0.00419078	0.0033118	0.00771133	0.0108103
			0.7	64.3233	83.8262	47.8977	41.2617	77.8705	32.635	45.0087		0.7	0.016429	0.005086	0.00260912	0.00480299	0.0039014	0.0107151	0.0133041
			0.6	67.5132	84.6584	48.5317	42.5956	79.1815	34.3735	45.6631		0.6	0.0192524	0.00547723	0.00299448	0.00541519	0.004491	0.0137188	0.0157978
			0.5	70.7031	85.4905	49.1656	43.9295	80.4924	36.112	46.3175		0.5	0.0220759	0.00586846	0.00337985	0.0060274	0.0050806	0.0167226	0.0182915
			0.4	73.8931	86.3227	49.7996	45.2635	81.8034	37.8505	46.9719		0.4	0.0248993	0.00625969	0.00376522	0.00663961	0.0056702	0.0197264	0.0207852
			0.3	77.083	87.1549	50.4335	46.5974	83.1144	39.589	47.6262		0.3	0.0277228	0.00665092	0.00415058	0.00725182	0.0062598	0.0227301	0.0232789
			0.2	80.2729	87.9871	51.0675	47.9313	84.4254	41.3275	48.2806		0.2	0.0305462	0.00704215	0.00453595	0.00786402	0.0068494	0.0257339	0.0257726
			0.1	83.4629	88.8192	51.7014	49.2653	85.7363	43.066	48.935		0.1	0.0333696	0.00743338	0.00492131	0.00847623	0.007439	0.0287376	0.0282664
			0	86.6528	89.6514	52.3354	50.5992	87.0473	44.8044	49.5894		0	0.0361931	0.00782461	0.00530668	0.00908844	0.0080286	0.0317414	0.0307601
			AP									Htox
			Energy density - absolute values	NaNMC	NaMVP	NaMMO	NaNMMT	NaPBA	LiNMC	LiFP		Energy density - absolute values	NaNMC	NaMVP	NaMMO	NaNMMT	NaPBA	LiNMC	LiFP
			1	0.372416	0.640293	0.206834	0.194013	0.291601	0.150503	0.219181		1	0.0364924	0.170039	0.014391	0.0142496	0.0193672	0.0190799	0.0261972
			0.9	0.434203	0.661792	0.236008	0.22759	0.319764	0.180535	0.230815		0.9	0.0444335	0.170464	0.014689	0.0157703	0.0201435	0.0275768	0.033563
			0.8	0.495991	0.68329	0.265182	0.261166	0.347927	0.210566	0.242448		0.8	0.0523746	0.170889	0.0149869	0.0172909	0.0209197	0.0360738	0.0409288
			0.7	0.557778	0.704789	0.294356	0.294743	0.37609	0.240597	0.254081		0.7	0.0603157	0.171315	0.0152849	0.0188116	0.021696	0.0445708	0.0482947
			0.6	0.619565	0.726288	0.323531	0.32832	0.404253	0.270628	0.265714		0.6	0.0682568	0.17174	0.0155828	0.0203323	0.0224722	0.0530678	0.0556605
			0.5	0.681352	0.747786	0.352705	0.361897	0.432415	0.30066	0.277347		0.5	0.0761979	0.172165	0.0158808	0.021853	0.0232485	0.0615648	0.0630263
			0.4	0.743139	0.769285	0.381879	0.395473	0.460578	0.330691	0.28898		0.4	0.0841391	0.17259	0.0161787	0.0233737	0.0240248	0.0700618	0.0703921
			0.3	0.804927	0.790784	0.411053	0.42905	0.488741	0.360722	0.300613		0.3	0.0920802	0.173015	0.0164767	0.0248944	0.024801	0.0785588	0.077758
			0.2	0.866714	0.812283	0.440227	0.462627	0.516904	0.390753	0.312246		0.2	0.100021	0.17344	0.0167746	0.0264151	0.0255773	0.0870558	0.0851238
			0.1	0.928501	0.833781	0.469401	0.496203	0.545067	0.420785	0.32388		0.1	0.107962	0.173865	0.0170726	0.0279358	0.0263535	0.0955528	0.0924896
			0	0.990288	0.85528	0.498575	0.52978	0.57323	0.450816	0.335513		0	0.115904	0.174291	0.0173705	0.0294564	0.0271298	0.10405	0.0998554
	Full results Table (for SI)
	Wh/cell	158.318	158.318	158.318	158.474	158.474	158.474	158.291	158.291	158.291	158.443	158.443	158.443	159.43	159.43	159.43	158.468	158.468	158.468	157.997	157.997	157.997
		NaNMC			NaMVP			NaMMO			NaNMMT			NaPBA			LiNMC			LiFP
per cell	Abbr	Prod	Rec	Net	Prod	Rec	Net	Prod	Rec	Net	Prod	Rec	Net	Prod	Rec	Net	Prod	Rec	Net	Prod	Rec	Net	Unit
Acidification	AP	0.15678	-0.09782	0.05896	0.13554	-0.03407	0.10147	0.07892	-0.04618	0.03274	0.08394	-0.0532	0.03074	0.09139	-0.0449	0.04649	0.07144	-0.04759	0.02385	0.05301	-0.01838	0.03463	molc H+ eq
Climate change	GWP	13.7187	-5.05023	8.66843	14.2074	-1.31878	12.8887	8.28422	-1.00348	7.28074	8.01709	-2.11352	5.90357	13.878	-2.09008	11.7879	7.10008	-2.75495	4.34513	7.83497	-1.03389	6.80108	kg CO2 eq
Freshwater ecotoxicity	ETPf	549.876	-360.816	189.06	376.755	-44.862	331.893	123.101	-33.522	89.5788	203.27	-92.5867	110.683	208.928	-73.3263	135.602	969.276	-804.088	165.188	1256.84	-1020.26	236.574	CTUe
Freshwater eutrophication	EPf	0.00493	-0.00151	0.00342	0.00581	-4.94247e-05	0.00576058	0.00278	4.128e-05	0.00282128	0.0026	-0.00041	0.00219	0.00398	-0.00026	0.00372	0.00541	-0.00352	0.00189	0.01107	-0.00407	0.007	kg P eq
Human toxicity, cancer effects	HTPc	6.16316e-06	-4.37822e-06	1.78494e-06	1.50774e-05	-4.05756e-07	1.46716e-05	9.65025e-07	-3.08629e-07	6.56396e-07	1.62113e-06	-9.35174e-07	6.85956e-07	1.6302e-06	-6.56079e-07	9.74121e-07	3.32929e-06	-2.59534e-06	7.3395e-07	1.92396e-06	-8.39182e-07	1.08478e-06	CTUh
Human toxicity, non-cancer effects	HTPnc	1.21864e-05	-8.19396e-06	3.99244e-06	1.25432e-05	-2.68004e-07	1.22752e-05	1.78457e-06	-1.62992e-07	1.62158e-06	3.04604e-06	-1.47425e-06	1.57179e-06	2.6951e-06	-5.81505e-07	2.1136e-06	1.31593e-05	-1.08697e-05	2.2896e-06	1.38529e-05	-1.07986e-05	3.0543e-06	CTUh
Ionizing radiation E (interim)	IRPe	2.5135e-05	-1.67738e-05	8.3612e-06	4.72612e-06	2.87636e-07	5.01376e-06	3.55227e-06	1.47052e-07	3.69932e-06	5.73509e-06	-2.58053e-06	3.15456e-06	4.45032e-06	2.19772e-07	4.67009e-06	1.16005e-05	-8.50627e-06	3.09423e-06	2.77624e-06	1.24015e-07	2.90026e-06	CTUe
Ionizing radiation HH	IRPhh	4.11443	-2.10144	2.01299	1.43068	0.20158	1.63226	1.17758	0.17042	1.348	1.32416	-0.24686	1.0773	1.4781	0.19721	1.67531	1.92503	-1.07126	0.85377	0.86619	0.14164	1.00783	kBq U235 eq
Land use	LU	15.0163	-5.57018	9.44617	18.4908	-1.65816	16.8326	9.26896	-1.83073	7.43823	11.3619	-4.46754	6.89438	12.2855	-2.35905	9.92643	1.84147	1.1797	3.02117	1.90522	6.90381	8.80903	kg C deficit
Marine eutrophication	EPm	0.02472	-0.0175	0.00722	0.02029	-0.00836	0.01193	0.01545	-0.00954	0.00591	0.01576	-0.01048	0.00528	0.01908	-0.00978	0.0093	0.0099	-0.00656	0.00334	0.00984	-0.00403	0.00581	kg N eq
Mineral, fossil & ren resource depletion	ADP	0.00573	-0.00447	0.00126	0.00124	-0.00062	0.00062	0.00084	-0.00061	0.00023	0.00144	-0.00097	0.00047	0.00128	-0.00094	0.00034	0.00503	-0.00476	0.00027	0.00486	-0.00394	0.00092	kg Sb eq
Ozone depletion	ODP	1.8274e-06	-6.35962e-07	1.19144e-06	1.23342e-06	-1.03138e-07	1.13028e-06	7.39456e-07	-1.50421e-07	5.89035e-07	7.37173e-07	-2.09503e-07	5.2767e-07	1.41684e-06	-1.17568e-07	1.29927e-06	7.8499e-07	-2.93987e-07	4.91003e-07	6.17554e-07	-4.56666e-08	5.71887e-07	kg CFC-11 eq
Particulate matter	PMP	0.01158	-0.00689	0.00469	0.0106	-0.00238	0.00822	0.00658	-0.00255	0.00403	0.00562	-0.00329	0.00233	0.00758	-0.00338	0.0042	0.00646	-0.00433	0.00213	0.00557	-0.00245	0.00312	kg PM2.5 eq
Photochemical ozone formation	POF	0.05783	-0.03522	0.02261	0.05802	-0.01619	0.04183	0.03632	-0.01989	0.01643	0.03502	-0.02105	0.01397	0.04534	-0.02104	0.0243	0.02705	-0.01715	0.0099	0.02767	-0.01205	0.01562	kg NMVOC eq
Terrestrial eutrophication	EPt	0.22917	-0.15214	0.07703	0.20654	-0.08313	0.12341	0.16694	-0.10362	0.06332	0.154	-0.1029	0.0511	0.19186	-0.10422	0.08764	0.09109	-0.06047	0.03062	0.10404	-0.05043	0.05361	molc N eq
Water resource depletion	WDP	15.6833	-8.1726	7.51066	6.97262	-0.45568	6.51694	5.00015	-0.28217	4.71798	5.58113	-1.73306	3.84807	7.6298	-1.0732	6.5566	8.01798	-4.63255	3.38543	4.95109	-0.93083	4.02026	m3 water eq
		NaNMC			NaMVP			NaMMO			NaNMMT			NaPBA			LiNMC			LiFP
per kWh	Abbr	Prod	Rec	Net	Prod	Rec	Net	Prod	Rec	Net	Prod	Rec	Net	Prod	Rec	Net	Prod	Rec	Net	Prod	Rec	Net	Unit
Acidification	AP	0.990288	-0.617872	0.372416	0.85528	-0.214987	0.640293	0.498575	-0.291741	0.206834	0.52978	-0.335767	0.194013	0.57323	-0.281628	0.291601	0.450816	-0.300313	0.150503	0.335513	-0.116331	0.219181	molc H+ eq
Climate change	GWP	86.6528	-31.8994	54.7534	89.6514	-8.32172	81.3297	52.3354	-6.33946	45.9959	50.5992	-13.3393	37.2599	87.0473	-13.1097	73.9376	44.8044	-17.3849	27.4196	49.5894	-6.54373	43.0456	kg CO2 eq
Freshwater ecotoxicity	ETPf	3473.25	-2279.06	1194.18	2377.38	-283.087	2094.3	777.686	-211.774	565.912	1282.92	-584.353	698.568	1310.47	-459.928	850.543	6116.53	-5074.13	1042.4	7954.8	-6457.47	1497.33	CTUe
Freshwater eutrophication	EPf	0.0311399	-0.00953779	0.0216022	0.0366621	-0.000311878	0.0363502	0.0175626	0.000260785	0.0178234	0.0164097	-0.00258768	0.013822	0.0249639	-0.00163081	0.0233331	0.0341393	-0.0222127	0.0119267	0.0700646	-0.02576	0.0443046	kg P eq
Human toxicity, cancer effects	HTPc	3.89291e-05	-2.76547e-05	1.12744e-05	9.51409e-05	-2.56039e-06	9.25805e-05	6.09652e-06	-1.94976e-06	4.14677e-06	1.02316e-05	-5.90227e-06	4.32935e-06	1.02252e-05	-4.11515e-06	6.11002e-06	2.10092e-05	-1.63777e-05	4.63153e-06	1.21772e-05	-5.31138e-06	6.86581e-06	CTUh
Human toxicity, non-cancer effects	HTPnc	7.69744e-05	-5.17565e-05	2.52179e-05	7.91497e-05	-1.69115e-06	7.74586e-05	1.1274e-05	-1.0297e-06	1.02443e-05	1.92248e-05	-9.3046e-06	9.92022e-06	1.69046e-05	-3.6474e-06	1.32572e-05	8.30406e-05	-6.85923e-05	1.44483e-05	8.76782e-05	-6.83469e-05	1.93314e-05	CTUh
Ionizing radiation E (interim)	IRPe	0.000158763	-0.00010595	5.28128e-05	2.98226e-05	1.81503e-06	3.16376e-05	2.24414e-05	9.28997e-07	2.33704e-05	3.61965e-05	-1.62868e-05	1.99097e-05	2.79139e-05	1.37849e-06	2.92924e-05	7.3204e-05	-5.36781e-05	1.95259e-05	1.75715e-05	7.8492e-07	1.83564e-05	CTUe
Ionizing radiation HH	IRPhh	25.9885	-13.2736	12.7149	9.02783	1.272	10.2998	7.43933	1.07662	8.51596	8.35732	-1.55804	6.79929	9.27115	1.23697	10.5081	12.1477	-6.76009	5.38764	5.48232	0.896473	6.37879	kBq U235 eq
Land use	LU	94.8496	-35.1836	59.666	116.68	-10.4633	106.217	58.5564	-11.5656	46.9908	71.7098	-28.1965	43.5133	77.0588	-14.7968	62.262	11.6204	7.4444	19.0648	12.0586	43.6958	55.7544	kg C deficit
Marine eutrophication	EPm	0.156142	-0.110537	0.0456046	0.128033	-0.052753	0.0752803	0.097605	-0.0602687	0.0373363	0.0994679	-0.0661436	0.0333243	0.119676	-0.0613435	0.0583328	0.0624731	-0.0413963	0.0210768	0.0622797	-0.0255068	0.0367729	kg N eq
Mineral, fossil & ren resource depletion	ADP	0.0361931	-0.0282344	0.00795869	0.00782461	-0.0039123	0.0039123	0.00530668	-0.00385366	0.00145302	0.00908844	-0.00612207	0.00296637	0.0080286	-0.005896	0.0021326	0.0317414	-0.0300376	0.00170381	0.0307601	-0.0249372	0.0058229	kg Sb eq
Ozone depletion	ODP	1.15426e-05	-4.017e-06	7.52562e-06	7.78309e-06	-6.50818e-07	7.13227e-06	4.67149e-06	-9.50281e-07	3.72121e-06	4.6526e-06	-1.32226e-06	3.33034e-06	8.88691e-06	-7.37427e-07	8.14948e-06	4.95361e-06	-1.85518e-06	3.09843e-06	3.90864e-06	-2.89035e-07	3.61961e-06	kg CFC-11 eq
Particulate matter	PMP	0.0731441	-0.0435201	0.029624	0.0668878	-0.0150182	0.0518696	0.041569	-0.0161096	0.0254594	0.0354702	-0.0207646	0.0147056	0.0475444	-0.0212005	0.0263438	0.0407653	-0.0273241	0.0134412	0.0352538	-0.0155066	0.0197472	kg PM2.5 eq
Photochemical ozone formation	POF	0.365279	-0.222464	0.142814	0.366116	-0.102162	0.263954	0.229451	-0.125655	0.103796	0.221026	-0.132855	0.0881705	0.284388	-0.13197	0.152418	0.170697	-0.108224	0.0624731	0.17513	-0.0762673	0.0988626	kg NMVOC eq
Terrestrial eutrophication	EPt	1.44753	-0.96098	0.486554	1.3033	-0.524564	0.778738	1.05464	-0.654617	0.400023	0.971958	-0.649445	0.322513	1.20341	-0.653704	0.549708	0.574816	-0.381591	0.193225	0.658494	-0.319183	0.33931	molc N eq
Water resource depletion	WDP	99.0621	-51.6216	47.4405	43.9984	-2.87542	41.123	31.5883	-1.7826	29.8057	35.2248	-10.9381	24.2868	47.8567	-6.73148	41.1253	50.5968	-29.2333	21.3635	31.3366	-5.89144	25.4452	m3 water eq

## Sheet: Use Phase_Grid
			Changeable	data needed
	Case	1								Hilfszeile		3	6	9	12	15	18
	Parameter	Value	Unit							Use phase	NaNMC	NaMVP	NaMMO	NaNMMT	NaPBA	LiNMC	LiFP
	Capacity	2000	kWh							Efficiency	0.92	0.93	0.92	0.92	0.93	0.92	0.93
	Power	1	MW							Min SOC	0.2	0.2	0.2	0.2	0.2	0.2	0.2
	Cycles per day	2	-							Max SOC	0.95	0.95	0.95	0.95	0.95	0.95	0.95
	Project life time	20	years							Cycle life time	4000	7000	4000	4000	7000	4000	7000
	Cycles over project lifetime	14600	Cylces							Calendric Life time	10	10	10	10	10	10	10
										Retention rate	0.8	0.8	0.8	0.8	0.8	0.8	0.8
										Cap for 1 kWh provided	1.57609	1.55914	1.57609	1.57609	1.55914	1.57609	1.55914
										Energy Density	136.31	152.467	157.08	171.91	124.1	272.115	197.419
	Total energy stored	29200000	kWh							Factor	0	0	0	0
	Total cycles per year	1460	typical storage times --> 1000 - 2000 hours p.a.							Total cap	3152.17	3118.28	3152.17	3152.17	3118.28	3152.17	3118.28
	Operation rate p. year	0.166667								Ex. Cell cycle	2.65	1.08571	2.65	2.65	1.08571	2.65	1.08571
										Ex Cell cal.	1	1	1	1	1	1	1
										Used Ex	2.65	1.08571	2.65	2.65	1.08571	2.65	1.08571
										Total consumed Energy	2.53913e+06	2.19785e+06	2.53913e+06	2.53913e+06	2.19785e+06	2.53913e+06	2.19785e+06
	Selected eletricity	1	1 für electricty "from Grid", 2 für Wind, 3 für PV, 0 ohne Strom							In %	0.0869565	0.0752688	0.0869565	0.0869565	0.0752688	0.0869565	0.0752688
	AP	0.00222
	GWP	0.43101								Impacts per kg	NaNMC	NaMVP	NaMMO	NaNMMT	NaPBA	LiNMC	LiFP
	Htox	0.000174291								AP	0.372416	0.640293	0.206834	0.194013	0.291601	0.150503	0.219181	molc H+ eq
	RDP	3.25116e-06								GWP	54.7534	81.3297	45.9959	37.2599	73.9376	27.4196	43.0456	kg CO2 eq
	ODP	1.79507e-08								Htox	0.0364924	0.170039	0.014391	0.0142496	0.0193672	0.0190799	0.0261972	kCTUh
	PMF	0.00016								RDP	0.00795869	0.0039123	0.00145302	0.00296637	0.0021326	0.00170381	0.0058229	kg Sb eq
										ODP	7.52562e-06	7.13227e-06	3.72121e-06	3.33034e-06	8.14948e-06	3.09843e-06	3.61961e-06	kg CFC-11 eq
										PMF	0.029624	0.0518696	0.0254594	0.0147056	0.0263438	0.0134412	0.0197472	kg PM2.5 eq
										Impact per kWh	NaNMC	NaMVP	NaMMO	NaNMMT	NaPBA	LiNMC	LiFP
										AP	0.372416	0.640293	0.206834	0.194013	0.291601	0.150503	0.219181	molc H+ eq
										GWP	54.7534	81.3297	45.9959	37.2599	73.9376	27.4196	43.0456	kg CO2 eq
										Htox	0.0364924	0.170039	0.014391	0.0142496	0.0193672	0.0190799	0.0261972	kCTUh
	Data source									RDP	0.00795869	0.0039123	0.00145302	0.00296637	0.0021326	0.00170381	0.0058229	kg Sb eq
	Electricity from grid		ILCD			Normalisiert				ODP	7.52562e-06	7.13227e-06	3.72121e-06	3.33034e-06	8.14948e-06	3.09843e-06	3.61961e-06	kg CFC-11 eq
	AP	DE	0.00222	molc H+ eq	per kWh	0.00515069				PMF	0.029624	0.0518696	0.0254594	0.0147056	0.0263438	0.0134412	0.0197472	kg PM2.5 eq
	GWP	DE	0.43101	kg CO2 eq	per kWh	1
	Htox	DE	0.000174291	mCTUh	per kWh	0.000404378			Hilfsspalte	AP total	NaNMC	NaMVP	NaMMO	NaNMMT	NaPBA	LiNMC	LiFP
	RDP	DE	3.25116e-06	kg Sb eq	per kWh	7.54312e-06			0	Constr.	1173.92	1996.61	651.977	611.562	909.294	474.413	683.469
	ODP	DE	1.79507e-08	kg CFC-11 eq	per kWh	4.1648e-08			0	El. Cons	5636.87	4879.23	5636.87	5636.87	4879.23	5636.87	4879.23
	PMF	DE	0.00016	kg PM2.5 eq	per kWh	0.000371221			0	Batt exchange	3110.89	2167.75	1727.74	1620.64	987.234	1257.19	742.052
	1.0 kWh electricity, medium voltage	market group for electricity, medium voltage | electricity, medium voltage | Cutoff, U, EU w/o CH									9921.68	9043.59	8016.59	7869.07	6775.75	7368.48	6304.75
	Electricity from renewables		Wind
	AP		9.04e-05	molc H+ eq	per kWh	0.00020974				AP per kWh	NaNMC	NaMVP	NaMMO	NaNMMT	NaPBA	LiNMC	LiFP
	GWP		0.0166	kg CO2 eq	per kWh	0.0385142				Constr.	0.0402028	0.0683771	0.022328	0.0209439	0.0311402	0.016247	0.0234065
	Htox		4.87352e-05	mCTUh	per kWh	0.000113072				El. Cons	0.193043	0.167097	0.193043	0.193043	0.167097	0.193043	0.167097
	RDP		1.69e-06	kg Sb eq	per kWh	3.92102e-06				Batt exchange	0.106537	0.074238	0.0591692	0.0555014	0.0338094	0.0430546	0.0254127
	ODP		1.19e-09	kg CFC-11 eq	per kWh	2.76096e-09				Total	0.339784	0.309712	0.274541	0.269489	0.232046	0.252345	0.215916
	PMF		1.57e-05	kg PM2.5 eq	per kWh	3.64261e-05					0	2	4	6	8	10	12
	electricity production, wind, 1-3MW turbine, onshore | electricity, high voltage | Cutoff, U, DE						1.0 kWh electricity, high voltage			W+	0.44022	0.855691	0.244491	0.229336	0.389698	0.177905	0.0878746
										W-	0.124384	0.098437	0.124384	0.124384	0.098437	0.124384	0.098437
											NaNMC	NaMVP	NaMMO	NaNMMT	NaPBA	LiNMC	LiFP
									1	Constr.	172592	253609	144987	117450	230558	86431.2	134228
	Electrictiy from PV								1	El. Cons	1.09439e+06	947295	1.09439e+06	1.09439e+06	947295	1.09439e+06	947295
	AP		0.00057	molc H+ eq	per kWh	0.00132248			1	Batt exchange	457370	275347	384216	311241	250320	229043	145734
	GWP		0.09547	kg CO2 eq	per kWh	0.221503			1	Total	1.72435e+06	1.47625e+06	1.62359e+06	1.52308e+06	1.42817e+06	1.40986e+06	1.22726e+06
	Htox		9.41942e-05	mCTUh	per kWh	0.000218543
	RDP		1.44753e-05	kg Sb eq	per kWh	3.35846e-05				GWP per kWh	NaNMC	NaMVP	NaMMO	NaNMMT	NaPBA	LiNMC	LiFP
	ODP		1.02348e-08	kg CFC-11 eq	per kWh	2.37461e-08				Constr.	0.0059107	0.00868523	0.00496531	0.00402225	0.00789582	0.00295997	0.00459686
	PMF		9.03685e-05	kg PM2.5 eq	per kWh	0.000209667				El. Cons	0.0374791	0.0324416	0.0374791	0.0374791	0.0324416	0.0374791	0.0324416
	1.0 kWh electricity, low voltage	electricity production, photovoltaic, 570kWp open ground installation, multi-Si | electricity, low voltage | Cutoff, U, DE								Batt exchange	0.0156633	0.00942968	0.0131581	0.010659	0.00857261	0.00784393	0.00499088
										Total	0.0590532	0.0505565	0.0556025	0.0521603	0.04891	0.048283	0.0420293
											0	2	4	6	8	10	12
										W+	0.0647221	0.160718	0.0945544	0.0929448	0.0988106	0.0796784	0.0754496
										W-	0.0241489	0.0191114	0.0241489	0.0241489	0.0191114	0.0241489	0.0191114
										Htox Total	NaNMC	NaMVP	NaMMO	NaNMMT	NaPBA	LiNMC	LiFP
									2	Constr.	115.03	530.229	45.3631	44.9171	60.3924	60.143	81.6902
									2	El. Cons	442.548	383.066	442.548	442.548	383.066	442.548	383.066
									2	Batt exchange	304.83	575.678	120.212	119.03	65.5689	159.379	88.6922
									2	Total	862.408	1488.97	608.123	606.495	509.027	662.07	553.448
										Htox per kWh	NaNMC	NaMVP	NaMMO	NaNMMT	NaPBA	LiNMC	LiFP
										Constr.	0.00393939	0.0181585	0.00155353	0.00153826	0.00206823	0.00205969	0.00279761
										El. Cons	0.0151557	0.0131187	0.0151557	0.0151557	0.0131187	0.0151557	0.0131187
										Batt exchange	0.0104394	0.019715	0.00411685	0.00407638	0.00224551	0.00545818	0.0030374
										Total	0.0295345	0.0509922	0.0208261	0.0207704	0.0174324	0.0226736	0.0189537
											0	2	4	6	8	10	12
										W+	0.0431363	0.227241	0.0170112	0.0168439	0.0258825	0.0225536	0.010503
										W-	0.0097653	0.00772824	0.0097653	0.0097653	0.00772824	0.0097653	0.00772824
										RDP Total	NaNMC	NaMVP	NaMMO	NaNMMT	NaPBA	LiNMC	LiFP
									3	Constr.	25.0872	12.1997	4.58017	9.3505	6.65003	5.37071	18.1574
									3	El. Cons	8.25512	7.14556	8.25512	8.25512	7.14556	8.25512	7.14556
									3	Batt exchange	66.481	13.2453	12.1374	24.7788	7.22004	14.2324	19.7138
									3	Total	99.8233	32.5906	24.9727	42.3844	21.0156	27.8582	45.0167
										RDP per kWh	NaNMC	NaMVP	NaMMO	NaNMMT	NaPBA	LiNMC	LiFP
										Constr.	0.00085915	0.000417797	0.000156855	0.000320223	0.000227741	0.000183928	0.000621829
										El. Cons	0.00028271	0.000244711	0.00028271	0.00028271	0.000244711	0.00028271	0.000244711
										Batt exchange	0.00227675	0.000453608	0.000415666	0.00084859	0.000247262	0.00048741	0.000675129
										Total	0.00341861	0.00111612	0.000855231	0.00145152	0.000719713	0.000954048	0.00154167
											0	2	4	6	8	10	12
										W+	0.00940769	0.00522843	0.00171756	0.00350644	0.00285001	0.00201402	0.00233452
										W-	0.0014176	0.00014416	0.000258811	0.000528367	0.00014416	0.000303482	0.00014416
										ODP Total	NaNMC	NaMVP	NaMMO	NaNMMT	NaPBA	LiNMC	LiFP
									4	Constr.	0.0237221	0.0222404	0.0117299	0.0104978	0.0254124	0.0097668	0.011287
									4	El. Cons	0.0455792	0.0394529	0.0455792	0.0455792	0.0394529	0.0455792	0.0394529
									4	Batt exchange	0.0628635	0.0241467	0.0310843	0.0278192	0.0275906	0.025882	0.0122544
										Total	0.132165	0.0858401	0.0883934	0.0838962	0.0924559	0.081228	0.0629943
										ODP per kWh	NaNMC	NaMVP	NaMMO	NaNMMT	NaPBA	LiNMC	LiFP
										Constr.	8.124e-10	7.61658e-10	4.01709e-10	3.59515e-10	8.70286e-10	3.34479e-10	3.8654e-10
										El. Cons	1.56093e-09	1.35113e-09	1.56093e-09	1.56093e-09	1.35113e-09	1.56093e-09	1.35113e-09
										Batt exchange	2.15286e-09	8.26943e-10	1.06453e-09	9.52714e-10	9.44882e-10	8.8637e-10	4.19671e-10
										Total	4.52619e-09	2.93973e-09	3.02717e-09	2.87316e-09	3.1663e-09	2.78178e-09	2.15734e-09
										PMF total	NaNMC	NaMVP	NaMMO	NaNMMT	NaPBA	LiNMC	LiFP
									5	Constr.	93.38	161.744	80.2525	46.3546	82.1475	42.3689	61.5773
									5	El. Cons	406.261	351.656	406.261	406.261	351.656	406.261	351.656
									5	Batt exchange	247.457	175.608	212.669	122.84	89.1887	112.278	66.8554
										Total	747.098	689.007	699.183	575.455	522.992	560.908	480.089
										PMF per kWh	NaNMC	NaMVP	NaMMO	NaNMMT	NaPBA	LiNMC	LiFP
										Constr.	3.19795e-06	5.53917e-06	2.74837e-06	1.58749e-06	2.81327e-06	1.45099e-06	2.10881e-06
										El. Cons	1.3913e-05	1.2043e-05	1.3913e-05	1.3913e-05	1.2043e-05	1.3913e-05	1.2043e-05
										Batt exchange	8.47456e-06	6.01396e-06	7.28319e-06	4.20684e-06	3.05441e-06	3.84513e-06	2.28957e-06
										Total	2.55855e-05	2.35961e-05	2.39446e-05	1.97074e-05	1.79107e-05	1.92092e-05	1.64414e-05
										Summary Total impacts per kWh
										AP	0.339784	0.309712	0.274541	0.269489	0.232046	0.252345	0.215916
										GWP	0.0590532	0.0505565	0.0556025	0.0521603	0.04891	0.048283	0.0420293
										Htox	0.0295345	0.0509922	0.0208261	0.0207704	0.0174324	0.0226736	0.0189537
										RDP	0.00341861	0.00111612	0.000855231	0.00145152	0.000719713	0.000954048	0.00154167
										ODP	4.52619e-09	2.93973e-09	3.02717e-09	2.87316e-09	3.1663e-09	2.78178e-09	2.15734e-09
										PMF	2.55855e-05	2.35961e-05	2.39446e-05	1.97074e-05	1.79107e-05	1.92092e-05	1.64414e-05
									Parametric study	Cycles
									Gesucht	AP	Htox
									Gesucht	GWP	RDP
									AP	NaNMC		NaMVP		NaMMO		NaNMMT		NaPBA		LiNMC		LiFP
									0.339784	10	0.309712	10	0.274541	10	0.269489	10	0.232046	10	0.252345	10	0.215916	10
									1000	0.780004	1000	1.1654	1000	0.519032	1000	0.498825	1000	0.621744	1000	0.43025	2500	0.303791
									2000	0.486524	2000	0.66625	2000	0.356038	2000	0.345934	2000	0.39442	2000	0.311647	3500	0.264735
									3000	0.388697	3000	0.499865	3000	0.301706	3000	0.294971	3000	0.318646	3000	0.272112	4500	0.243038
									4000	0.339784	4000	0.416673	4000	0.274541	4000	0.269489	4000	0.280759	4000	0.252345	5500	0.22923
									5000	0.310436	5000	0.366758	5000	0.258241	5000	0.2542	5000	0.258026	5000	0.240485	6500	0.219671
									6000	0.29087	6000	0.333481	6000	0.247375	6000	0.244007	6000	0.242871	6000	0.232578	7500	0.21391
									7000	0.276895	7000	0.309712	7000	0.239613	7000	0.236727	7000	0.232046	7000	0.22693	8500	0.21391
									8000	0.273449	8000	0.303851	8000	0.237699	8000	0.234931	8000	0.229377	8000	0.225538	9500	0.21391
									9000	0.273449	9000	0.303851	9000	0.237699	9000	0.234931	9000	0.229377	9000	0.225538	10500	0.21391
									GWP	NaNMC		NaMVP		NaMMO		NaNMMT		NaPBA		LiNMC		LiFP
									0.0590532	10	0.0505565	10	0.0556025	10	0.0521603	10	0.04891	10	0.048283	10	0.0420293	10
									1000	0.123775	1000	0.159246	1000	0.109973	1000	0.0962039	1000	0.147721	1000	0.0806948	2500	0.0592873
									2000	0.0806272	2000	0.0958438	2000	0.0737259	2000	0.0668415	2000	0.0900811	2000	0.0590869	3500	0.0516171
									3000	0.0662445	3000	0.0747097	3000	0.0616436	3000	0.0570541	3000	0.070868	3000	0.0518843	4500	0.0473559
									4000	0.0590532	4000	0.0641427	4000	0.0556025	4000	0.0521603	4000	0.0612614	4000	0.048283	5500	0.0446442
									5000	0.0547384	5000	0.0578025	5000	0.0519778	5000	0.0492241	5000	0.0554974	5000	0.0461223	6500	0.0427669
									6000	0.0518618	6000	0.0535757	6000	0.0495614	6000	0.0472666	6000	0.0516548	6000	0.0446817	7500	0.0416353
									7000	0.0498072	7000	0.0505565	7000	0.0478353	7000	0.0458684	7000	0.04891	7000	0.0436528	8500	0.0416353
									8000	0.0493005	8000	0.0498121	8000	0.0474098	8000	0.0455236	8000	0.0482333	8000	0.0433991	9500	0.0416353
									9000	0.0493005	9000	0.0498121	9000	0.0474098	9000	0.0455236	9000	0.0482333	9000	0.0433991	10500	0.0416353
									Htox	NaNMC		NaMVP		NaMMO		NaNMMT		NaPBA		LiNMC		LiFP
									0.0295345	10	0.0509922	10	0.0208261	10	0.0207704	10	0.0174324	10	0.0226736	10	0.0189537	10
									1000	0.0726709	1000	0.278233	1000	0.0378373	1000	0.0376143	1000	0.0433149	1000	0.0452273	2500	0.0294567
									2000	0.0439133	2000	0.145676	2000	0.0264965	2000	0.026385	2000	0.0282168	2000	0.0301915	3500	0.0247887
									3000	0.0343275	3000	0.10149	3000	0.0227163	3000	0.0226419	3000	0.0231841	3000	0.0251796	4500	0.0221954
									4000	0.0295345	4000	0.0793974	4000	0.0208261	4000	0.0207704	4000	0.0206677	4000	0.0226736	5500	0.0205451
									5000	0.0266588	5000	0.0661416	5000	0.0196921	5000	0.0196475	5000	0.0191579	5000	0.02117	6500	0.0194025
									6000	0.0247416	6000	0.0573045	6000	0.018936	6000	0.0188988	6000	0.0181514	6000	0.0201677	7500	0.0187139
									7000	0.0233722	7000	0.0509922	7000	0.018396	7000	0.0183641	7000	0.0174324	7000	0.0194517	8500	0.0187139
									8000	0.0230345	8000	0.0494358	8000	0.0182628	8000	0.0182323	8000	0.0172552	8000	0.0192751	9500	0.0187139
									9000	0.0230345	9000	0.0494358	9000	0.0182628	9000	0.0182323	9000	0.0172552	9000	0.0192751	10500	0.0187139
									RDP	NaNMC		NaMVP		NaMMO		NaNMMT		NaPBA		LiNMC		LiFP
									0.00341861	10	0.00111612	10	0.000855231	10	0.00145152	10	0.000719713	10	0.000954048	10	0.00154167	10
									1000	0.0128263	1000	0.00634454	1000	0.00257279	1000	0.00495796	1000	0.00356973	1000	0.00296807	2500	0.00387619
									2000	0.0065545	2000	0.00329463	2000	0.00142775	2000	0.00262033	2000	0.00190722	2000	0.00162539	3500	0.00283863
									3000	0.0044639	3000	0.00227799	3000	0.00104607	3000	0.00184113	3000	0.00135305	3000	0.00117783	4500	0.0022622
									4000	0.00341861	4000	0.00176967	4000	0.000855231	4000	0.00145152	4000	0.00107597	4000	0.000954048	5500	0.00189539
									5000	0.00279143	5000	0.00146468	5000	0.000740727	5000	0.00121776	5000	0.000909714	5000	0.000819781	6500	0.00164144
									6000	0.00237331	6000	0.00126135	6000	0.00066439	6000	0.00106192	6000	0.000798881	6000	0.000730269	7500	0.00148837
									7000	0.00207465	7000	0.00111612	7000	0.000609865	7000	0.000950602	7000	0.000719713	7000	0.000666332	8500	0.00148837
									8000	0.00200101	8000	0.0010803	8000	0.00059642	8000	0.000923155	8000	0.000700193	8000	0.000650566	9500	0.00148837
									9000	0.00200101	9000	0.0010803	9000	0.00059642	9000	0.000923155	9000	0.000700193	9000	0.000650566	10500	0.00148837
									Parametric study	Efficiency
									AP	NaNMC		NaMVP		NaMMO		NaNMMT		NaPBA		LiNMC		LiFP
									0.339784	10	0.309712	10	0.274541	10	0.269489	10	0.232046	10	0.252345	10	0.215916	10
									0.9	0.393407	0.9	0.389282	0.9	0.328164	0.9	0.323112	0.9	0.311616	0.9	0.305968	0.9	0.295486
									0.91	0.3663	0.91	0.362176	0.91	0.301058	0.91	0.296006	0.91	0.28451	0.91	0.278862	0.91	0.26838
									0.92	0.339784	0.92	0.335659	0.92	0.274541	0.92	0.269489	0.92	0.257993	0.92	0.252345	0.92	0.241863
									0.93	0.313837	0.93	0.309712	0.93	0.248594	0.93	0.243542	0.93	0.232046	0.93	0.226398	0.93	0.215916
									0.94	0.288442	0.94	0.284317	0.94	0.223199	0.94	0.218147	0.94	0.206652	0.94	0.201004	0.94	0.190521
									0.95	0.263582	0.95	0.259457	0.95	0.198339	0.95	0.193287	0.95	0.181792	0.95	0.176144	0.95	0.165661
									0.96	0.23924	0.96	0.235115	0.96	0.173997	0.96	0.168945	0.96	0.15745	0.96	0.151802	0.96	0.141319
									0.97	0.2154	0.97	0.211275	0.97	0.150157	0.97	0.145105	0.97	0.133609	0.97	0.127961	0.97	0.117479
									GWP
									0.0590532	10	0.0505565	10	0.0556025	10	0.0521603	10	0.04891	10	0.048283	10	0.0420293	10
									0.9	0.069464	0.9	0.0660049	0.9	0.0660134	0.9	0.0625712	0.9	0.0643584	0.9	0.0586939	0.9	0.0574777
									0.91	0.0642014	0.91	0.0607423	0.91	0.0607507	0.91	0.0573086	0.91	0.0590958	0.91	0.0534313	0.91	0.0522151
									0.92	0.0590532	0.92	0.055594	0.92	0.0556025	0.92	0.0521603	0.92	0.0539476	0.92	0.048283	0.92	0.0470669
									0.93	0.0540157	0.93	0.0505565	0.93	0.050565	0.93	0.0471228	0.93	0.04891	0.93	0.0432455	0.93	0.0420293
									0.94	0.0490853	0.94	0.0456262	0.94	0.0456347	0.94	0.0421925	0.94	0.0439797	0.94	0.0383152	0.94	0.037099
									0.95	0.0442588	0.95	0.0407996	0.95	0.0408081	0.95	0.0373659	0.95	0.0391532	0.95	0.0334886	0.95	0.0322725
									0.96	0.0395328	0.96	0.0360737	0.96	0.0360821	0.96	0.03264	0.96	0.0344272	0.96	0.0287627	0.96	0.0275465
									0.97	0.0349043	0.97	0.0314451	0.97	0.0314536	0.97	0.0280114	0.97	0.0297986	0.97	0.0241341	0.97	0.0229179
									Htox
									0.0295345	10	0.0509922	10	0.0208261	10	0.0207704	10	0.0174324	10	0.0226736	10	0.0189537	10
									0.9	0.0337445	0.9	0.0572392	0.9	0.0250361	0.9	0.0249803	0.9	0.0236794	0.9	0.0268836	0.9	0.0252007
									0.91	0.0316164	0.91	0.0551111	0.91	0.022908	0.91	0.0228522	0.91	0.0215513	0.91	0.0247555	0.91	0.0230726
									0.92	0.0295345	0.92	0.0530293	0.92	0.0208261	0.92	0.0207704	0.92	0.0194695	0.92	0.0226736	0.92	0.0209908
									0.93	0.0274975	0.93	0.0509922	0.93	0.0187891	0.93	0.0187333	0.93	0.0174324	0.93	0.0206366	0.93	0.0189537
									0.94	0.0255037	0.94	0.0489985	0.94	0.0167953	0.94	0.0167396	0.94	0.0154387	0.94	0.0186428	0.94	0.01696
									0.95	0.023552	0.95	0.0470467	0.95	0.0148436	0.95	0.0147879	0.95	0.013487	0.95	0.0166911	0.95	0.0150082
									0.96	0.0216409	0.96	0.0451357	0.96	0.0129325	0.96	0.0128768	0.96	0.0115759	0.96	0.01478	0.96	0.0130971
									0.97	0.0197692	0.97	0.043264	0.97	0.0110608	0.97	0.0110051	0.97	0.00970419	0.97	0.0129083	0.97	0.0112255
									RDP
									0.00341861	10	0.00111612	10	0.000855231	10	0.00145152	10	0.000719713	10	0.000954048	10	0.00154167	10
									0.9	0.00349714	0.9	0.00123264	0.9	0.000933761	0.9	0.00153005	0.9	0.000836242	0.9	0.00103258	0.9	0.0016582
									0.91	0.00345744	0.91	0.00119295	0.91	0.000894064	0.91	0.00149036	0.91	0.000796546	0.91	0.000992882	0.91	0.0016185
									0.92	0.00341861	0.92	0.00115411	0.92	0.000855231	0.92	0.00145152	0.92	0.000757712	0.92	0.000954048	0.92	0.00157967
									0.93	0.00338061	0.93	0.00111612	0.93	0.000817232	0.93	0.00141352	0.93	0.000719713	0.93	0.00091605	0.93	0.00154167
									0.94	0.00334342	0.94	0.00107893	0.94	0.000780042	0.94	0.00137633	0.94	0.000682523	0.94	0.00087886	0.94	0.00150448
									0.95	0.00330701	0.95	0.00104252	0.95	0.000743635	0.95	0.00133993	0.95	0.000646116	0.95	0.000842453	0.95	0.00146807
									0.96	0.00327136	0.96	0.00100687	0.96	0.000707986	0.96	0.00130428	0.96	0.000610467	0.96	0.000806804	0.96	0.00143242
									0.97	0.00323645	0.97	0.000971956	0.97	0.000673073	0.97	0.00126936	0.97	0.000575554	0.97	0.00077189	0.97	0.00139751
									3 D Plott
									AP	NaNMC
									0.339784	1000	2000	3000	4000	5000	6000	7000
									0.9	0.833627	0.540147	0.44232	0.393407	0.364059	0.344493	0.330518
									0.91	0.806521	0.513041	0.415214	0.3663	0.336952	0.317387	0.303412
									0.92	0.780004	0.486524	0.388697	0.339784	0.310436	0.29087	0.276895
									0.93	0.754057	0.460577	0.36275	0.313837	0.284489	0.264923	0.250948
									0.94	0.728662	0.435182	0.337356	0.288442	0.259094	0.239529	0.225554
									0.95	0.703802	0.410322	0.312495	0.263582	0.234234	0.214669	0.200694
									0.96	0.67946	0.38598	0.288153	0.23924	0.209892	0.190327	0.176351
									0.97	0.65562	0.36214	0.264313	0.2154	0.186052	0.166486	0.152511
									GWP
									0.0590532	1000	2000	3000	4000	5000	6000	7000
									0.9	0.134186	0.0910381	0.0766554	0.069464	0.0651492	0.0622727	0.060218
									0.91	0.128924	0.0857755	0.0713928	0.0642014	0.0598866	0.0570101	0.0549554
									0.92	0.123775	0.0806272	0.0662445	0.0590532	0.0547384	0.0518618	0.0498072
									0.93	0.118738	0.0755897	0.061207	0.0540157	0.0497009	0.0468243	0.0447696
									0.94	0.113807	0.0706594	0.0562767	0.0490853	0.0447705	0.041894	0.0398393
									0.95	0.108981	0.0658328	0.0514501	0.0442588	0.039944	0.0370674	0.0350128
									0.96	0.104255	0.0611068	0.0467241	0.0395328	0.035218	0.0323414	0.0302868
									0.97	0.0996264	0.0564783	0.0420956	0.0349043	0.0305894	0.0277129	0.0256582
									Htox
									0.0295345	1000	2000	3000	4000	5000	6000	7000
									0.9	0.0768808	0.0481232	0.0385374	0.0337445	0.0308687	0.0289515	0.0275821
									0.91	0.0747527	0.0459951	0.0364093	0.0316164	0.0287406	0.0268234	0.025454
									0.92	0.0726709	0.0439133	0.0343275	0.0295345	0.0266588	0.0247416	0.0233722
									0.93	0.0706338	0.0418762	0.0322904	0.0274975	0.0246217	0.0227045	0.0213351
									0.94	0.0686401	0.0398825	0.0302967	0.0255037	0.022628	0.0207108	0.0193414
									0.95	0.0666883	0.0379308	0.0283449	0.023552	0.0206762	0.0187591	0.0173897
									0.96	0.0647773	0.0360197	0.0264338	0.0216409	0.0187652	0.016848	0.0154786
									0.97	0.0629056	0.034148	0.0245622	0.0197692	0.0168935	0.0149763	0.0136069
									RDP
									0.00341861	1000	2000	3000	4000	5000	6000	7000
									0.9	0.0129048	0.00663303	0.00454244	0.00349714	0.00286996	0.00245184	0.00215318
									0.91	0.0128651	0.00659334	0.00450274	0.00345744	0.00283026	0.00241214	0.00211348
									0.92	0.0128263	0.0065545	0.0044639	0.00341861	0.00279143	0.00237331	0.00207465
									0.93	0.0127883	0.0065165	0.00442591	0.00338061	0.00275343	0.00233531	0.00203665
									0.94	0.0127511	0.00647931	0.00438872	0.00334342	0.00271624	0.00229812	0.00199946
									0.95	0.0127147	0.00644291	0.00435231	0.00330701	0.00267983	0.00226171	0.00196305
									0.96	0.0126791	0.00640726	0.00431666	0.00327136	0.00264418	0.00222606	0.00192741
									0.97	0.0126441	0.00637234	0.00428175	0.00323645	0.00260927	0.00219115	0.00189249

## Sheet: Use Phase
			Changeable	data needed
	Case	1								Help line		3	6	9	12	15	18
	Parameter	Value	Unit							Use phase	NaNMC	NaMVP	NaMMO	NaNMMT	NaPBA	LiNMC	LiFP
	Capacity	2000	kWh							Efficiency	0.92	0.93	0.92	0.92	0.93	0.92	0.93
	Power	1	MW							Min SOC	0.2	0.2	0.2	0.2	0.2	0.2	0.2
	Cycles per day	2	-							Max SOC	0.95	0.95	0.95	0.95	0.95	0.95	0.95
	Project life time	20	years							Cycle life time	4000	7000	4000	4000	7000	4000	7000
	Cycles over project lifetime	14600	Cylces							Calendric Life time	10	10	10	10	10	10	10
										Retention rate	0.8	0.8	0.8	0.8	0.8	0.8	0.8
										Cap for 1 kWh provided	1.57609	1.55914	1.57609	1.57609	1.55914	1.57609	1.55914
										Energy Density	136.31	152.467	157.08	171.91	124.1	272.115	197.419
	Total energy stored	29200000	kWh								NaNMC	NaMVP	NaMMO	NaNMMT	NaPBA	LiNMC	LiFP
	Total cycles per year	1460	typical storage times --> 1000 - 2000 hours p.a.							Total cap	3152.17	3118.28	3152.17	3152.17	3118.28	3152.17	3118.28
	Operation rate p. year	0.166667								Ex. Cell cycle	2.65	1.08571	2.65	2.65	1.08571	2.65	1.08571
										Ex Cell cal.	1	1	1	1	1	1	1
										Used Ex	2.65	1.08571	2.65	2.65	1.08571	2.65	1.08571
	Recycling	1	y=1 else 0							Total consumed Energy	2.53913e+06	2.19785e+06	2.53913e+06	2.53913e+06	2.19785e+06	2.53913e+06	2.19785e+06
	Selected eletricity	3	1 für electricty "from Grid", 2 für Wind, 3 für PV, 0 ohne Strom							In %	0.0869565	0.0752688	0.0869565	0.0869565	0.0752688	0.0869565	0.0752688
	Resulting Electrictiy mix
	AP	0.00057								Impacts per kg	NaNMC	NaMVP	NaMMO	NaNMMT	NaPBA	LiNMC	LiFP
	GWP	0.09547								AP	0.372416	0.640293	0.206834	0.194013	0.291601	0.150503	0.219181	molc H+ eq
	Htox	9.41942e-05								GWP	54.7534	81.3297	45.9959	37.2599	73.9376	27.4196	43.0456	kg CO2 eq
	RDP	1.44753e-05								Htox	0.0364924	0.170039	0.014391	0.0142496	0.0193672	0.0190799	0.0261972	mCTUh
	ODP	1.02348e-08								RDP	0.00795869	0.0039123	0.00145302	0.00296637	0.0021326	0.00170381	0.0058229	kg Sb eq
	PMF	9.03685e-05								ODP	7.52562e-06	7.13227e-06	3.72121e-06	3.33034e-06	8.14948e-06	3.09843e-06	3.61961e-06	kg CFC-11 eq
										PMF	0.029624	0.0518696	0.0254594	0.0147056	0.0263438	0.0134412	0.0197472	kg PM2.5 eq
										Energy density base	136.31	152.467	157.08	171.91	124.1	272.115	197.419
										Used	1	1	1	1	1	1	1
										Impact per kWh	NaNMC	NaMVP	NaMMO	NaNMMT	NaPBA	LiNMC	LiFP
										AP	0.372416	0.640293	0.206834	0.194013	0.291601	0.150503	0.219181	molc H+ eq
	Electricity sources									GWP	54.7534	81.3297	45.9959	37.2599	73.9376	27.4196	43.0456	kg CO2 eq
										Htox	0.0364924	0.170039	0.014391	0.0142496	0.0193672	0.0190799	0.0261972	kCTUh
	Data source									RDP	0.00795869	0.0039123	0.00145302	0.00296637	0.0021326	0.00170381	0.0058229	kg Sb eq
	Electricity from grid		ILCD			Normalized				ODP	7.52562e-06	7.13227e-06	3.72121e-06	3.33034e-06	8.14948e-06	3.09843e-06	3.61961e-06	kg CFC-11 eq
	AP	DE	0.00222	molc H+ eq	per kWh	0.00515069				PMF	0.029624	0.0518696	0.0254594	0.0147056	0.0263438	0.0134412	0.0197472	kg PM2.5 eq
	GWP	DE	0.43101	kg CO2 eq	per kWh	1
	Htox	DE	0.000174291	mCTUh	per kWh	0.000404378			Help lines	AP total	NaNMC	NaMVP	NaMMO	NaNMMT	NaPBA	LiNMC	LiFP
	RDP	DE	3.25116e-06	kg Sb eq	per kWh	7.54312e-06			0	Constr.	1173.92	1996.61	651.977	611.562	909.294	474.413	683.469
	ODP	DE	1.79507e-08	kg CFC-11 eq	per kWh	4.1648e-08			0	El. Cons	1447.3	1252.77	1447.3	1447.3	1252.77	1447.3	1252.77
	PMF	DE	0.00016	kg PM2.5 eq	per kWh	0.000371221			0	Batt exchange	3110.89	2167.75	1727.74	1620.64	987.234	1257.19	742.052
	1.0 kWh electricity, medium voltage	market group for electricity, medium voltage | electricity, medium voltage | Cutoff, U, EU w/o CH									5732.11	5417.14	3827.02	3679.51	3149.3	3178.91	2678.29
	Electricity from renewables		Wind
	AP		9.04e-05	molc H+ eq	per kWh	0.00020974				mAP per kWh	NaNMC	NaMVP	NaMMO	NaNMMT	NaPBA	LiNMC	LiFP
	GWP		0.0166	kg CO2 eq	per kWh	0.0385142				Production	0.0402028	0.0683771	0.022328	0.0209439	0.0311402	0.016247	0.0234065
	Htox		4.87352e-05	mCTUh	per kWh	0.000113072				Use	0.0495652	0.0429032	0.0495652	0.0495652	0.0429032	0.0495652	0.0429032
	RDP		1.69e-06	kg Sb eq	per kWh	3.92102e-06				Replacement	0.106537	0.074238	0.0591692	0.0555014	0.0338094	0.0430546	0.0254127
	ODP		1.19e-09	kg CFC-11 eq	per kWh	2.76096e-09				Total	0.196305	0.185518	0.131062	0.126011	0.107853	0.108867	0.0917224
	PMF		1.57e-05	kg PM2.5 eq	per kWh	3.64261e-05					0	2	4	6	8	10	12
	electricity production, wind, 1-3MW turbine, onshore | electricity, high voltage | Cutoff, U, DE						1.0 kWh electricity, high voltage			W+	0.44022	0.855691	0.244491	0.229336	0.389698	0.177905	0.292915
										W-	0.0395003	0.0311554	0.0361372	0.0358768	0.0279527	0.0349931	0.0272875
										GWP	NaNMC	NaMVP	NaMMO	NaNMMT	NaPBA	LiNMC	LiFP
									1	Production	172592	253609	144987	117450	230558	86431.2	134228
	Electrictiy from PV								1	Use	242411	209829	242411	242411	209829	242411	209829
	AP		0.00057	molc H+ eq	per kWh	0.00132248			1	Replacement	457370	275347	384216	311241	250320	229043	145734
	GWP		0.09547	kg CO2 eq	per kWh	0.221503			1	Total	872373	738784	771614	671102	690707	557885	489791
	Htox		9.41942e-05	mCTUh	per kWh	0.000218543
	RDP		1.44753e-05	kg Sb eq	per kWh	3.35846e-05				GWP per kWh	NaNMC	NaMVP	NaMMO	NaNMMT	NaPBA	LiNMC	LiFP
	ODP		1.02348e-08	kg CFC-11 eq	per kWh	2.37461e-08				Production	5.9107	8.68523	4.96531	4.02225	7.89582	2.95997	4.59686
	PMF		9.03685e-05	kg PM2.5 eq	per kWh	0.000209667				Use	8.30174	7.18591	8.30174	8.30174	7.18591	8.30174	7.18591
	1.0 kWh electricity, low voltage	electricity production, photovoltaic, 570kWp open ground installation, multi-Si | electricity, low voltage | Cutoff, U, DE								Replacement	15.6633	9.42968	13.1581	10.659	8.57261	7.84393	4.99088
										Total	29.8758	25.3008	26.4251	22.9829	23.6543	19.1056	16.7737
											0	2	4	6	8	10	12
										W+	64.7221	108.689	54.3701	44.0436	98.8106	32.4117	57.5264
										W-	9.75265	4.98024	8.19276	6.63671	4.91234	5.90596	4.6286
										Htox Total	NaNMC	NaMVP	NaMMO	NaNMMT	NaPBA	LiNMC	LiFP
									2	Production	115.03	530.229	45.3631	44.9171	60.3924	60.143	81.6902
									2	Use	239.171	207.025	239.171	239.171	207.025	239.171	207.025
									2	Replacement	304.83	575.678	120.212	119.03	65.5689	159.379	88.6922
									2	Total	659.032	1312.93	404.747	403.119	332.986	458.693	377.407
										mHtox per kWh	NaNMC	NaMVP	NaMMO	NaNMMT	NaPBA	LiNMC	LiFP
										Production	0.00393939	0.0181585	0.00155353	0.00153826	0.00206823	0.00205969	0.00279761
										Use	0.0081908	0.00708989	0.0081908	0.0081908	0.00708989	0.0081908	0.00708989
										Replacement	0.0104394	0.019715	0.00411685	0.00407638	0.00224551	0.00545818	0.0030374
										Total	0.0225696	0.0449634	0.0138612	0.0138054	0.0114036	0.0157087	0.0129249
											0	2	4	6	8	10	12
										W+	0.0431363	0.227241	0.0170112	0.0168439	0.0258825	0.0225536	0.0350101
										W-	0.0065	0.00573846	0.00556987	0.00556699	0.00435455	0.0056651	0.00441728
										RDP Total	NaNMC	NaMVP	NaMMO	NaNMMT	NaPBA	LiNMC	LiFP
									3	Production	25.0872	12.1997	4.58017	9.3505	6.65003	5.37071	18.1574
									3	Use	36.7547	31.8145	36.7547	36.7547	31.8145	36.7547	31.8145
									3	Replacement	66.481	13.2453	12.1374	24.7788	7.22004	14.2324	19.7138
									3	Total	128.323	57.2595	53.4723	70.884	45.6846	56.3578	69.6857
										RDP per kWh	NaNMC	NaMVP	NaMMO	NaNMMT	NaPBA	LiNMC	LiFP
										Production	0.00085915	0.000417797	0.000156855	0.000320223	0.000227741	0.000183928	0.000621829
										Use	0.00125872	0.00108954	0.00125872	0.00125872	0.00108954	0.00125872	0.00108954
										Replacement	0.00227675	0.000453608	0.000415666	0.00084859	0.000247262	0.00048741	0.000675129
										Total	0.00439462	0.00196094	0.00183124	0.00242753	0.00156454	0.00193006	0.0023865
											0	2	4	6	8	10	12
										W+	0.00940769	0.00522843	0.00171756	0.00350644	0.00285001	0.00201402	0.00778175
										W-	0.0014176	0.000677783	0.000840543	0.00087128	0.000661437	0.000845637	0.000695332
										ODP Total	NaNMC	NaMVP	NaMMO	NaNMMT	NaPBA	LiNMC	LiFP
									4	Production	0.0237221	0.0222404	0.0117299	0.0104978	0.0254124	0.0097668	0.011287
									4	Use	0.0259875	0.0224945	0.0259875	0.0259875	0.0224945	0.0259875	0.0224945
									4	Replacement	0.0628635	0.0241467	0.0310843	0.0278192	0.0275906	0.025882	0.0122544
										Total	0.112573	0.0688817	0.0688017	0.0643046	0.0754975	0.0616363	0.0460359
										ODP per kWh	NaNMC	NaMVP	NaMMO	NaNMMT	NaPBA	LiNMC	LiFP
										Production	8.124e-10	7.61658e-10	4.01709e-10	3.59515e-10	8.70286e-10	3.34479e-10	3.8654e-10
										Use	8.89983e-10	7.70361e-10	8.89983e-10	8.89983e-10	7.70361e-10	8.89983e-10	7.70361e-10
										Replacement	2.15286e-09	8.26943e-10	1.06453e-09	9.52714e-10	9.44882e-10	8.8637e-10	4.19671e-10
										Total	3.85524e-09	2.35896e-09	2.35622e-09	2.20221e-09	2.58553e-09	2.11083e-09	1.57657e-09
										PMF total	NaNMC	NaMVP	NaMMO	NaNMMT	NaPBA	LiNMC	LiFP
									5	Production	93.38	161.744	80.2525	46.3546	82.1475	42.3689	61.5773
									5	Use	229.457	198.616	229.457	229.457	198.616	229.457	198.616
									5	Replacement	247.457	175.608	212.669	122.84	89.1887	112.278	66.8554
										Total	570.295	535.968	522.379	398.652	369.953	384.104	327.049
										PMF per kWh	NaNMC	NaMVP	NaMMO	NaNMMT	NaPBA	LiNMC	LiFP
										Production	3.19795e-06	5.53917e-06	2.74837e-06	1.58749e-06	2.81327e-06	1.45099e-06	2.10881e-06
										Use	7.85813e-06	6.80193e-06	7.85813e-06	7.85813e-06	6.80193e-06	7.85813e-06	6.80193e-06
										Replacement	8.47456e-06	6.01396e-06	7.28319e-06	4.20684e-06	3.05441e-06	3.84513e-06	2.28957e-06
										Total	1.95306e-05	1.83551e-05	1.78897e-05	1.36525e-05	1.26696e-05	1.31542e-05	1.12003e-05
										Summary Total impacts per kWh
										AP	0.196305	0.185518	0.131062	0.126011	0.107853	0.108867	0.0917224
										GWP	29.8758	25.3008	26.4251	22.9829	23.6543	19.1056	16.7737
										Htox	0.0225696	0.0449634	0.0138612	0.0138054	0.0114036	0.0157087	0.0129249
										RDP	0.00439462	0.00196094	0.00183124	0.00242753	0.00156454	0.00193006	0.0023865
										ODP	3.85524e-09	2.35896e-09	2.35622e-09	2.20221e-09	2.58553e-09	2.11083e-09	1.57657e-09
										PMF	1.95306e-05	1.83551e-05	1.78897e-05	1.36525e-05	1.26696e-05	1.31542e-05	1.12003e-05
									Parametric study	Cycles
									Gesucht	AP	Htox
									Gesucht	GWP	RDP
									AP	NaNMC		NaMVP		NaMMO		NaNMMT		NaPBA		LiNMC		LiFP								0	1	2	3	4	5	6
									0.196305	10	0.185518	10	0.131062	10	0.126011	10	0.107853	10	0.108867	10	0.0917224	10							cycle life	NaNMC	NaMVP	NaMMO	NaNMMT	NaPBA	LiNMC	LiFP
									1000	0.636525	1000	1.04121	1000	0.375554	1000	0.355346	1000	0.49755	1000	0.286772	1000	0.384638							1000	0.636525	1.04121	0.375554	0.355346	0.49755	0.286772	0.384638	1000
									1500	0.440872	1500	0.708441	1500	0.266891	1500	0.253419	1500	0.346001	1500	0.207703	1500	0.270726							1500	0.440872	0.708441	0.266891	0.253419	0.346001	0.207703	0.270726	1500
									2000	0.343045	2000	0.542056	2000	0.21256	2000	0.202456	2000	0.270227	2000	0.168168	2000	0.21377							2000	0.343045	0.542056	0.21256	0.202456	0.270227	0.168168	0.21377	2000
									2500	0.284349	2500	0.442226	2500	0.179961	2500	0.171878	2500	0.224762	2500	0.144448	2500	0.179597							2500	0.284349	0.442226	0.179961	0.171878	0.224762	0.144448	0.179597	2500
									3000	0.245219	3000	0.375672	3000	0.158228	3000	0.151492	3000	0.194452	3000	0.128634	3000	0.156815							3000	0.245219	0.375672	0.158228	0.151492	0.194452	0.128634	0.156815	3000
									3500	0.217268	3500	0.328133	3500	0.142705	3500	0.136931	3500	0.172802	3500	0.117338	3500	0.140542							3500	0.217268	0.328133	0.142705	0.136931	0.172802	0.117338	0.140542	3500
									4000	0.196305	4000	0.29248	4000	0.131062	4000	0.126011	4000	0.156565	4000	0.108867	4000	0.128337							4000	0.196305	0.29248	0.131062	0.126011	0.156565	0.108867	0.128337	4000
									4500	0.180001	4500	0.264749	4500	0.122007	4500	0.117517	4500	0.143936	4500	0.102278	4500	0.118844							4500	0.180001	0.264749	0.122007	0.117517	0.143936	0.102278	0.118844	4500
									5000	0.166957	5000	0.242564	5000	0.114763	5000	0.110721	5000	0.133833	5000	0.0970065	5000	0.11125							5000	0.166957	0.242564	0.114763	0.110721	0.133833	0.0970065	0.11125	5000
									5500	0.156285	5500	0.224413	5500	0.108836	5500	0.105162	5500	0.125566	5500	0.0926937	5500	0.105037							5500	0.156285	0.224413	0.108836	0.105162	0.125566	0.0926937	0.105037
									6000	0.147392	6000	0.209288	6000	0.103897	6000	0.100529	6000	0.118678	6000	0.0890996	6000	0.099859							6000	0.147392	0.209288	0.103897	0.100529	0.118678	0.0890996	0.099859
									6500	0.139867	6500	0.196489	6500	0.0997173	6500	0.0966085	6500	0.112849	6500	0.0860585	6500	0.0954778							6500	0.139867	0.196489	0.0997173	0.0966085	0.112849	0.0860585	0.0954778
									7000	0.133417	7000	0.185518	7000	0.096135	7000	0.0932482	7000	0.107853	7000	0.0834518	7000	0.0917224							7000	0.133417	0.185518	0.096135	0.0932482	0.107853	0.0834518	0.0917224
									7500	0.129971	7500	0.179657	7500	0.0942212	7500	0.0914531	7500	0.105184	7500	0.0820592	7500	0.0897162							7500	0.129971	0.179657	0.0942212	0.0914531	0.105184	0.0820592	0.0897162
									8000	0.129971	8000	0.179657	8000	0.0942212	8000	0.0914531	8000	0.105184	8000	0.0820592	8000	0.0897162							8000	0.129971	0.179657	0.0942212	0.0914531	0.105184	0.0820592	0.0897162
									8500	0.129971	8500	0.179657	8500	0.0942212	8500	0.0914531	8500	0.105184	8500	0.0820592	8500	0.0897162							8500	0.129971	0.179657	0.0942212	0.0914531	0.105184	0.0820592	0.0897162
									9000	0.129971	9000	0.179657	9000	0.0942212	9000	0.0914531	9000	0.105184	9000	0.0820592	9000	0.0897162							9000	0.129971	0.179657	0.0942212	0.0914531	0.105184	0.0820592	0.0897162
									9500	0.129971	9500	0.179657	9500	0.0942212	9500	0.0914531	9500	0.105184	9500	0.0820592	9500	0.0897162							9500	0.129971	0.179657	0.0942212	0.0914531	0.105184	0.0820592	0.0897162
									10000	0.129971	10000	0.179657	10000	0.0942212	10000	0.0914531	10000	0.105184	10000	0.0820592	10000	0.0897162							10000	0.129971	0.179657	0.0942212	0.0914531	0.105184	0.0820592	0.0897162
									GWP	NaNMC		NaMVP		NaMMO		NaNMMT		NaPBA		LiNMC		LiFP								0	1	2	3	4	5	6
									29.8758	10	25.3008	10	26.4251	10	22.9829	10	23.6543	10	19.1056	10	16.7737	10								NaNMC	NaMVP	NaMMO	NaNMMT	NaPBA	LiNMC	LiFP	LFP*
									1000	94.5979	1000	133.99	1000	80.7953	1000	67.0266	1000	122.465	1000	51.5174	1000	74.3001							1000	94.5979	133.99	80.7953	67.0266	122.465	51.5174	74.3001	1000
									1500	65.8325	1500	91.7221	1500	56.6308	1500	47.4516	1500	84.0386	1500	37.1122	1500	51.9287							1500	65.8325	91.7221	56.6308	47.4516	84.0386	37.1122	51.9287	1500
									2000	51.4498	2000	70.5881	2000	44.5485	2000	37.6641	2000	64.8254	2000	29.9096	2000	40.743							2000	51.4498	70.5881	44.5485	37.6641	64.8254	29.9096	40.743	2000
									2500	42.8202	2500	57.9076	2500	37.2992	2500	31.7917	2500	53.2975	2500	25.588	2500	34.0316							2500	42.8202	57.9076	37.2992	31.7917	53.2975	25.588	34.0316	2500
									3000	37.0671	3000	49.454	3000	32.4662	3000	27.8767	3000	45.6123	3000	22.7069	3000	29.5573							3000	37.0671	49.454	32.4662	27.8767	45.6123	22.7069	29.5573	3000
									3500	32.9578	3500	43.4157	3500	29.0142	3500	25.0803	3500	40.1228	3500	20.6491	3500	26.3614							3500	32.9578	43.4157	29.0142	25.0803	40.1228	20.6491	26.3614	3500
									4000	29.8758	4000	38.887	4000	26.4251	4000	22.9829	4000	36.0057	4000	19.1056	4000	23.9645							4000	29.8758	38.887	26.4251	22.9829	36.0057	19.1056	23.9645	4000
									4500	27.4787	4500	35.3647	4500	24.4114	4500	21.3517	4500	32.8035	4500	17.9052	4500	22.1002							4500	27.4787	35.3647	24.4114	21.3517	32.8035	17.9052	22.1002	4500
									5000	25.561	5000	32.5468	5000	22.8004	5000	20.0467	5000	30.2417	5000	16.9449	5000	20.6087							5000	25.561	32.5468	22.8004	20.0467	30.2417	16.9449	20.6087	5000
									5500	23.992	5500	30.2412	5500	21.4824	5500	18.979	5500	28.1457	5500	16.1591	5500	19.3885							5500	23.992	30.2412	21.4824	18.979	28.1457	16.1591	19.3885
									6000	22.6844	6000	28.32	6000	20.384	6000	18.0892	6000	26.3991	6000	15.5043	6000	18.3716							6000	22.6844	28.32	20.384	18.0892	26.3991	15.5043	18.3716
									6500	21.5781	6500	26.6943	6500	19.4546	6500	17.3363	6500	24.9212	6500	14.9503	6500	17.5112							6500	21.5781	26.6943	19.4546	17.3363	24.9212	14.9503	17.5112
									7000	20.6298	7000	25.3008	7000	18.658	7000	16.691	7000	23.6543	7000	14.4754	7000	16.7737							7000	20.6298	25.3008	18.658	16.691	23.6543	14.4754	16.7737
									7500	20.1231	7500	24.5564	7500	18.2324	7500	16.3462	7500	22.9776	7500	14.2217	7500	16.3796							7500	20.1231	24.5564	18.2324	16.3462	22.9776	14.2217	16.3796
									8000	20.1231	8000	24.5564	8000	18.2324	8000	16.3462	8000	22.9776	8000	14.2217	8000	16.3796							8000	20.1231	24.5564	18.2324	16.3462	22.9776	14.2217	16.3796
									8500	20.1231	8500	24.5564	8500	18.2324	8500	16.3462	8500	22.9776	8500	14.2217	8500	16.3796							8500	20.1231	24.5564	18.2324	16.3462	22.9776	14.2217	16.3796
									9000	20.1231	9000	24.5564	9000	18.2324	9000	16.3462	9000	22.9776	9000	14.2217	9000	16.3796							9000	20.1231	24.5564	18.2324	16.3462	22.9776	14.2217	16.3796
									9500	20.1231	9500	24.5564	9500	18.2324	9500	16.3462	9500	22.9776	9500	14.2217	9500	16.3796							9500	20.1231	24.5564	18.2324	16.3462	22.9776	14.2217	16.3796
									10000	20.1231	10000	24.5564	10000	18.2324	10000	16.3462	10000	22.9776	10000	14.2217	10000	16.3796							10000	20.1231	24.5564	18.2324	16.3462	22.9776	14.2217	16.3796
									Htox	NaNMC		NaMVP		NaMMO		NaNMMT		NaPBA		LiNMC		LiFP								0	1	2	3	4	5	6
									0.0225696	10	0.0449634	10	0.0138612	10	0.0138054	10	0.0114036	10	0.0157087	10	0.0129249	10								NaNMC	NaMVP	NaMMO	NaNMMT	NaPBA	LiNMC	LiFP	LFP*
									1000	0.0657059	1000	0.272205	1000	0.0308723	1000	0.0306494	1000	0.0372861	1000	0.0382623	1000	0.047935							1000	0.0657059	0.272205	0.0308723	0.0306494	0.0372861	0.0382623	0.047935	1000
									1500	0.0465342	1500	0.183833	1500	0.0233118	1500	0.0231632	1500	0.0272207	1500	0.0282385	1500	0.0343199							1500	0.0465342	0.183833	0.0233118	0.0231632	0.0272207	0.0282385	0.0343199	1500
									2000	0.0369484	2000	0.139647	2000	0.0195316	2000	0.0194201	2000	0.022188	2000	0.0232266	2000	0.0275124							2000	0.0369484	0.139647	0.0195316	0.0194201	0.022188	0.0232266	0.0275124	2000
									2500	0.0311969	2500	0.113136	2500	0.0172634	2500	0.0171742	2500	0.0191684	2500	0.0202194	2500	0.0234279							2500	0.0311969	0.113136	0.0172634	0.0171742	0.0191684	0.0202194	0.0234279	2500
									3000	0.0273625	3000	0.0954615	3000	0.0157513	3000	0.015677	3000	0.0171553	3000	0.0182146	3000	0.0207049							3000	0.0273625	0.0954615	0.0157513	0.015677	0.0171553	0.0182146	0.0207049	3000
									3500	0.0246237	3500	0.0828369	3500	0.0146712	3500	0.0146075	3500	0.0157174	3500	0.0167827	3500	0.0187599							3500	0.0246237	0.0828369	0.0146712	0.0146075	0.0157174	0.0167827	0.0187599	3500
									4000	0.0225696	4000	0.0733686	4000	0.0138612	4000	0.0138054	4000	0.0146389	4000	0.0157087	4000	0.0173012							4000	0.0225696	0.0733686	0.0138612	0.0138054	0.0146389	0.0157087	0.0173012	4000
									4500	0.0209719	4500	0.0660043	4500	0.0132311	4500	0.0131816	4500	0.0138002	4500	0.0148734	4500	0.0161666							4500	0.0209719	0.0660043	0.0132311	0.0131816	0.0138002	0.0148734	0.0161666	4500
									5000	0.0196938	5000	0.0601128	5000	0.0127271	5000	0.0126825	5000	0.0131291	5000	0.0142051	5000	0.0152589							5000	0.0196938	0.0601128	0.0127271	0.0126825	0.0131291	0.0142051	0.0152589	5000
									5500	0.0186481	5500	0.0552926	5500	0.0123147	5500	0.0122742	5500	0.0125801	5500	0.0136583	5500	0.0145163							5500	0.0186481	0.0552926	0.0123147	0.0122742	0.0125801	0.0136583	0.0145163
									6000	0.0177767	6000	0.0512757	6000	0.0119711	6000	0.0119339	6000	0.0121226	6000	0.0132027	6000	0.0138974							6000	0.0177767	0.0512757	0.0119711	0.0119339	0.0121226	0.0132027	0.0138974
									6500	0.0170393	6500	0.0478768	6500	0.0116803	6500	0.011646	6500	0.0117355	6500	0.0128172	6500	0.0133737							6500	0.0170393	0.0478768	0.0116803	0.011646	0.0117355	0.0128172	0.0133737
									7000	0.0164072	7000	0.0449634	7000	0.011431	7000	0.0113992	7000	0.0114036	7000	0.0124867	7000	0.0129249							7000	0.0164072	0.0449634	0.011431	0.0113992	0.0114036	0.0124867	0.0129249
									7500	0.0160696	7500	0.043407	7500	0.0112979	7500	0.0112673	7500	0.0112264	7500	0.0123102	7500	0.0126851							7500	0.0160696	0.043407	0.0112979	0.0112673	0.0112264	0.0123102	0.0126851
									8000	0.0160696	8000	0.043407	8000	0.0112979	8000	0.0112673	8000	0.0112264	8000	0.0123102	8000	0.0126851							8000	0.0160696	0.043407	0.0112979	0.0112673	0.0112264	0.0123102	0.0126851
									8500	0.0160696	8500	0.043407	8500	0.0112979	8500	0.0112673	8500	0.0112264	8500	0.0123102	8500	0.0126851							8500	0.0160696	0.043407	0.0112979	0.0112673	0.0112264	0.0123102	0.0126851
									9000	0.0160696	9000	0.043407	9000	0.0112979	9000	0.0112673	9000	0.0112264	9000	0.0123102	9000	0.0126851							9000	0.0160696	0.043407	0.0112979	0.0112673	0.0112264	0.0123102	0.0126851
									9500	0.0160696	9500	0.043407	9500	0.0112979	9500	0.0112673	9500	0.0112264	9500	0.0123102	9500	0.0126851							9500	0.0160696	0.043407	0.0112979	0.0112673	0.0112264	0.0123102	0.0126851
									10000	0.0160696	10000	0.043407	10000	0.0112979	10000	0.0112673	10000	0.0112264	10000	0.0123102	10000	0.0126851							10000	0.0160696	0.043407	0.0112979	0.0112673	0.0112264	0.0123102	0.0126851
									RDP	NaNMC		NaMVP		NaMMO		NaNMMT		NaPBA		LiNMC		LiFP								0	1	2	3	4	5	6
									0.00439462	10	0.00196094	10	0.00183124	10	0.00242753	10	0.00156454	10	0.00193006	10	0.0023865	10								NaNMC	NaMVP	NaMMO	NaNMMT	NaPBA	LiNMC	LiFP	LFP*
									1000	0.0138023	1000	0.00718937	1000	0.00354881	1000	0.00593397	1000	0.00441456	1000	0.00394408	1000	0.0101682							1000	0.0138023	0.00718937	0.00354881	0.00593397	0.00441456	0.00394408	0.0101682	1000
									1500	0.00962111	1500	0.00515609	1500	0.00278544	1500	0.00437555	1500	0.00330622	1500	0.00304896	1500	0.00714201							1500	0.00962111	0.00515609	0.00278544	0.00437555	0.00330622	0.00304896	0.00714201	1500
									2000	0.00753051	2000	0.00413945	2000	0.00240376	2000	0.00359635	2000	0.00275205	2000	0.0026014	2000	0.00562889							2000	0.00753051	0.00413945	0.00240376	0.00359635	0.00275205	0.0026014	0.00562889	2000
									2500	0.00627616	2500	0.00352947	2500	0.00217476	2500	0.00312882	2500	0.00241955	2500	0.00233286	2500	0.00472102							2500	0.00627616	0.00352947	0.00217476	0.00312882	0.00241955	0.00233286	0.00472102	2500
									3000	0.00543992	3000	0.00312282	3000	0.00202208	3000	0.00281714	3000	0.00219788	3000	0.00215384	3000	0.00411577							3000	0.00543992	0.00312282	0.00202208	0.00281714	0.00219788	0.00215384	0.00411577	3000
									3500	0.0048426	3500	0.00283235	3500	0.00191303	3500	0.00259451	3500	0.00203954	3500	0.00202597	3500	0.00368346							3500	0.0048426	0.00283235	0.00191303	0.00259451	0.00203954	0.00202597	0.00368346	3500
									4000	0.00439462	4000	0.0026145	4000	0.00183124	4000	0.00242753	4000	0.00192079	4000	0.00193006	4000	0.00335922							4000	0.00439462	0.0026145	0.00183124	0.00242753	0.00192079	0.00193006	0.00335922	4000
									4500	0.00404619	4500	0.00244506	4500	0.00176763	4500	0.00229767	4500	0.00182843	4500	0.00185547	4500	0.00310703							4500	0.00404619	0.00244506	0.00176763	0.00229767	0.00182843	0.00185547	0.00310703	4500
									5000	0.00376744	5000	0.0023095	5000	0.00171674	5000	0.00219377	5000	0.00175454	5000	0.00179579	5000	0.00290528							5000	0.00376744	0.0023095	0.00171674	0.00219377	0.00175454	0.00179579	0.00290528	5000
									5500	0.00353937	5500	0.0021986	5500	0.0016751	5500	0.00210877	5500	0.00169409	5500	0.00174697	5500	0.00274021							5500	0.00353937	0.0021986	0.0016751	0.00210877	0.00169409	0.00174697	0.00274021
									6000	0.00334932	6000	0.00210618	6000	0.0016404	6000	0.00203793	6000	0.00164371	6000	0.00170628	6000	0.00260266							6000	0.00334932	0.00210618	0.0016404	0.00203793	0.00164371	0.00170628	0.00260266
									6500	0.0031885	6500	0.00202797	6500	0.00161104	6500	0.00197799	6500	0.00160108	6500	0.00167185	6500	0.00248626							6500	0.0031885	0.00202797	0.00161104	0.00197799	0.00160108	0.00167185	0.00248626
									7000	0.00305066	7000	0.00196094	7000	0.00158588	7000	0.00192661	7000	0.00156454	7000	0.00164234	7000	0.0023865							7000	0.00305066	0.00196094	0.00158588	0.00192661	0.00156454	0.00164234	0.0023865
									7500	0.00297702	7500	0.00192513	7500	0.00157243	7500	0.00189917	7500	0.00154502	7500	0.00162658	7500	0.0023332							7500	0.00297702	0.00192513	0.00157243	0.00189917	0.00154502	0.00162658	0.0023332
									8000	0.00297702	8000	0.00192513	8000	0.00157243	8000	0.00189917	8000	0.00154502	8000	0.00162658	8000	0.0023332							8000	0.00297702	0.00192513	0.00157243	0.00189917	0.00154502	0.00162658	0.0023332
									8500	0.00297702	8500	0.00192513	8500	0.00157243	8500	0.00189917	8500	0.00154502	8500	0.00162658	8500	0.0023332							8500	0.00297702	0.00192513	0.00157243	0.00189917	0.00154502	0.00162658	0.0023332
									9000	0.00297702	9000	0.00192513	9000	0.00157243	9000	0.00189917	9000	0.00154502	9000	0.00162658	9000	0.0023332							9000	0.00297702	0.00192513	0.00157243	0.00189917	0.00154502	0.00162658	0.0023332
									9500	0.00297702	9500	0.00192513	9500	0.00157243	9500	0.00189917	9500	0.00154502	9500	0.00162658	9500	0.0023332							9500	0.00297702	0.00192513	0.00157243	0.00189917	0.00154502	0.00162658	0.0023332
									10000	0.00297702	10000	0.00192513	10000	0.00157243	10000	0.00189917	10000	0.00154502	10000	0.00162658	10000	0.0023332							10000	0.00297702	0.00192513	0.00157243	0.00189917	0.00154502	0.00162658	0.0023332
									Parametric study	Efficiency																				0	1	2	3	4	5	6
									AP	NaNMC		NaMVP		NaMMO		NaNMMT		NaPBA		LiNMC		LiFP								NaNMC	NaMVP	NaMMO	NaNMMT	NaPBA	LiNMC	LiFP
									0.196305	10	0.185518	10	0.131062	10	0.126011	10	0.107853	10	0.108867	10	0.0917224	10							0.9	0.213334	0.210702	0.146642	0.141477	0.130448	0.123953	0.11378
									0.9	0.213334	0.9	0.210702	0.9	0.146642	0.9	0.141477	0.9	0.130448	0.9	0.123953	0.9	0.11378							0.91	0.204726	0.202123	0.138766	0.133659	0.122751	0.116327	0.106266
									0.91	0.204726	0.91	0.202123	0.91	0.138766	0.91	0.133659	0.91	0.122751	0.91	0.116327	0.91	0.106266							0.92	0.196305	0.193731	0.131062	0.126011	0.115221	0.108867	0.0989151
									0.92	0.196305	0.92	0.193731	0.92	0.131062	0.92	0.126011	0.92	0.115221	0.92	0.108867	0.92	0.0989151							0.93	0.188065	0.185518	0.123524	0.118527	0.107853	0.101567	0.0917224
									0.93	0.188065	0.93	0.185518	0.93	0.123524	0.93	0.118527	0.93	0.107853	0.93	0.101567	0.93	0.0917224							0.94	0.180001	0.177481	0.116146	0.111202	0.100642	0.0944228	0.0846828
									0.94	0.180001	0.94	0.177481	0.94	0.116146	0.94	0.111202	0.94	0.100642	0.94	0.0944228	0.94	0.0846828							0.95	0.172106	0.169613	0.108924	0.104031	0.0935822	0.0874289	0.0777914
									0.95	0.172106	0.95	0.169613	0.95	0.108924	0.95	0.104031	0.95	0.0935822	0.95	0.0874289	0.95	0.0777914							0.96	0.164376	0.161908	0.101851	0.0970101	0.0866699	0.0805807	0.0710436
									0.96	0.164376	0.96	0.161908	0.96	0.101851	0.96	0.0970101	0.96	0.0866699	0.96	0.0805807	0.96	0.0710436							0.97	0.156805	0.154363	0.0949251	0.0901337	0.0799001	0.0738737	0.0644349
									0.97	0.156805	0.97	0.154363	0.97	0.0949251	0.97	0.0901337	0.97	0.0799001	0.97	0.0738737	0.97	0.0644349
									GWP																					NaNMC	NaMVP	NaMMO	NaNMMT	NaPBA	LiNMC	LiFP
									29.8758	10	25.3008	10	26.4251	10	22.9829	10	23.6543	10	19.1056	10	16.7737	10							1000	32.6612	29.3265	29.1339	25.6152	27.6252	21.6518	20.5151
									0.9	32.6612	0.9	29.3265	0.9	29.1339	0.9	25.6152	0.9	27.6252	0.9	21.6518	0.9	20.5151							2000	31.2532	27.9551	27.7646	24.2846	26.2725	20.3647	19.2405
									0.91	31.2532	0.91	27.9551	0.91	27.7646	0.91	24.2846	0.91	26.2725	0.91	20.3647	0.91	19.2405							3000	29.8758	26.6135	26.4251	22.9829	24.9492	19.1056	17.9937
									0.92	29.8758	0.92	26.6135	0.92	26.4251	0.92	22.9829	0.92	24.9492	0.92	19.1056	0.92	17.9937							4000	28.528	25.3008	25.1144	21.7093	23.6543	17.8736	16.7737
									0.93	28.528	0.93	25.3008	0.93	25.1144	0.93	21.7093	0.93	23.6543	0.93	17.8736	0.93	16.7737							5000	27.2089	24.016	23.8316	20.4627	22.3871	16.6679	15.5796
									0.94	27.2089	0.94	24.016	0.94	23.8316	0.94	20.4627	0.94	22.3871	0.94	16.6679	0.94	15.5796							6000	25.9175	22.7583	22.5758	19.2423	21.1465	15.4875	14.4106
									0.95	25.9175	0.95	22.7583	0.95	22.5758	0.95	19.2423	0.95	21.1465	0.95	15.4875	0.95	14.4106							7000	24.653	21.5267	21.3462	18.0474	19.9317	14.3317	13.266
									0.96	24.653	0.96	21.5267	0.96	21.3462	0.96	18.0474	0.96	19.9317	0.96	14.3317	0.96	13.266							8000	23.4147	20.3206	20.1419	16.8771	18.742	13.1997	12.145
									0.97	23.4147	0.97	20.3206	0.97	20.1419	0.97	16.8771	0.97	18.742	0.97	13.1997	0.97	12.145
									Htox																					NaNMC	NaMVP	NaMMO	NaNMMT	NaPBA	LiNMC	LiFP
									0.0225696	10	0.0449634	10	0.0138612	10	0.0138054	10	0.0114036	10	0.0157087	10	0.0129249	10							1000	0.0251643	0.049602	0.0162624	0.0162054	0.0149236	0.018151	0.0164955
									0.9	0.0251643	0.9	0.049602	0.9	0.0162624	0.9	0.0162054	0.9	0.0149236	0.9	0.018151	0.9	0.0164955							2000	0.0238527	0.0480218	0.0150486	0.0149923	0.0137245	0.0169164	0.0152792
									0.91	0.0238527	0.91	0.0480218	0.91	0.0150486	0.91	0.0149923	0.91	0.0137245	0.91	0.0169164	0.91	0.0152792							3000	0.0225696	0.046476	0.0138612	0.0138054	0.0125514	0.0157087	0.0140892
									0.92	0.0225696	0.92	0.046476	0.92	0.0138612	0.92	0.0138054	0.92	0.0125514	0.92	0.0157087	0.92	0.0140892							4000	0.0213141	0.0449634	0.0126993	0.0126442	0.0114036	0.0145269	0.0129249
									0.93	0.0213141	0.93	0.0449634	0.93	0.0126993	0.93	0.0126442	0.93	0.0114036	0.93	0.0145269	0.93	0.0129249							5000	0.0200852	0.043483	0.0115621	0.0115076	0.0102802	0.0133703	0.0117853
									0.94	0.0200852	0.94	0.043483	0.94	0.0115621	0.94	0.0115076	0.94	0.0102802	0.94	0.0133703	0.94	0.0117853							6000	0.0188823	0.0420338	0.0104489	0.0103949	0.00918052	0.0122381	0.0106698
									0.95	0.0188823	0.95	0.0420338	0.95	0.0104489	0.95	0.0103949	0.95	0.00918052	0.95	0.0122381	0.95	0.0106698							7000	0.0177044	0.0406147	0.00935888	0.00930546	0.0081037	0.0111294	0.00957743
									0.96	0.0177044	0.96	0.0406147	0.96	0.00935888	0.96	0.00930546	0.96	0.0081037	0.96	0.0111294	0.96	0.00957743							8000	0.0165508	0.039225	0.00829132	0.00823845	0.00704908	0.0100436	0.00850762
									0.97	0.0165508	0.97	0.039225	0.97	0.00829132	0.97	0.00823845	0.97	0.00704908	0.97	0.0100436	0.97	0.00850762
									RDP																					NaNMC	NaMVP	NaMMO	NaNMMT	NaPBA	LiNMC	LiFP
									0.00439462	10	0.00196094	10	0.00183124	10	0.00242753	10	0.00156454	10	0.00193006	10	0.0023865	10							1000	0.00481395	0.00250882	0.00219361	0.00280315	0.0020992	0.00229462	0.00294856
									0.9	0.00481395	0.9	0.00250882	0.9	0.00219361	0.9	0.00280315	0.9	0.0020992	0.9	0.00229462	0.9	0.00294856							2000	0.00460198	0.00232218	0.00201044	0.00261328	0.00191707	0.00211034	0.00275709
									0.91	0.00460198	0.91	0.00232218	0.91	0.00201044	0.91	0.00261328	0.91	0.00191707	0.91	0.00211034	0.91	0.00275709							3000	0.00439462	0.0021396	0.00183124	0.00242753	0.00173889	0.00193006	0.00256978
									0.92	0.00439462	0.92	0.0021396	0.92	0.00183124	0.92	0.00242753	0.92	0.00173889	0.92	0.00193006	0.92	0.00256978							4000	0.00419172	0.00196094	0.0016559	0.00224578	0.00156454	0.00175366	0.0023865
									0.93	0.00419172	0.93	0.00196094	0.93	0.0016559	0.93	0.00224578	0.93	0.00156454	0.93	0.00175366	0.93	0.0023865							5000	0.00399313	0.00178609	0.0014843	0.0020679	0.0013939	0.00158101	0.00220712
									0.94	0.00399313	0.94	0.00178609	0.94	0.0014843	0.94	0.0020679	0.94	0.0013939	0.94	0.00158101	0.94	0.00220712							6000	0.00379873	0.00161492	0.0013163	0.00189376	0.00122686	0.001412	0.00203151
									0.95	0.00379873	0.95	0.00161492	0.95	0.0013163	0.95	0.00189376	0.95	0.00122686	0.95	0.001412	0.95	0.00203151							7000	0.00360837	0.00144731	0.0011518	0.00172325	0.0010633	0.0012465	0.00185957
									0.96	0.00360837	0.96	0.00144731	0.96	0.0011518	0.96	0.00172325	0.96	0.0010633	0.96	0.0012465	0.96	0.00185957							8000	0.00342194	0.00128316	0.000990699	0.00155625	0.000903104	0.00108442	0.00169117
									0.97	0.00342194	0.97	0.00128316	0.97	0.000990699	0.97	0.00155625	0.97	0.000903104	0.97	0.00108442	0.97	0.00169117
									Parametric study	Energy density
									AP	NaNMC		NaMVP		NaMMO		NaNMMT		NaPBA		LiNMC		LiFP								NaNMC	NaMVP	NaMMO	NaNMMT	NaPBA	LiNMC	LiFP
									0.196305	10	0.185518	10	0.131062	10	0.126011	10	0.107853	10	0.108867	10	0.0917224	10							100	0.249587	0.260344	0.177581	0.180982	0.123506	0.210934	0.139281
									100	0.249587	100	0.260344	100	0.177581	100	0.180982	100	0.123506	100	0.210934	100	0.139281							110	0.231403	0.240577	0.165943	0.169035	0.116178	0.196264	0.13052
									110	0.231403	110	0.240577	110	0.165943	110	0.169035	110	0.116178	110	0.196264	110	0.13052							120	0.21625	0.224104	0.156245	0.15908	0.110072	0.184039	0.123218
									120	0.21625	120	0.224104	120	0.156245	120	0.15908	120	0.110072	120	0.184039	120	0.123218							130	0.203428	0.210166	0.148039	0.150655	0.104905	0.173695	0.11704
									130	0.203428	130	0.210166	130	0.148039	130	0.150655	130	0.104905	130	0.173695	130	0.11704							140	0.192438	0.198218	0.141005	0.143435	0.100476	0.164828	0.111745
									140	0.192438	140	0.198218	140	0.141005	140	0.143435	140	0.100476	140	0.164828	140	0.111745							150	0.182913	0.187864	0.134909	0.137177	0.0966382	0.157144	0.107155
									150	0.182913	150	0.187864	150	0.134909	150	0.137177	150	0.0966382	150	0.157144	150	0.107155							160	0.174579	0.178804	0.129575	0.131701	0.0932798	0.15042	0.10314
									160	0.174579	160	0.178804	160	0.129575	160	0.131701	160	0.0932798	160	0.15042	160	0.10314							170	0.167225	0.17081	0.124869	0.126869	0.0903164	0.144488	0.0995963
									170	0.167225	170	0.17081	170	0.124869	170	0.126869	170	0.0903164	170	0.144488	170	0.0995963							180	0.160688	0.163704	0.120685	0.122575	0.0876824	0.139214	0.0964467
									180	0.160688	180	0.163704	180	0.120685	180	0.122575	180	0.0876824	180	0.139214	180	0.0964467							190	0.15484	0.157346	0.116942	0.118732	0.0853256	0.134496	0.0936286
									190	0.15484	190	0.157346	190	0.116942	190	0.118732	190	0.0853256	190	0.134496	190	0.0936286							200	0.149576	0.151624	0.113573	0.115274	0.0832045	0.130249	0.0910923
									200	0.149576	200	0.151624	200	0.113573	200	0.115274	200	0.0832045	200	0.130249	200	0.0910923							210	0.144813	0.146447	0.110525	0.112145	0.0812853	0.126407	0.0887976
									210	0.144813	210	0.146447	210	0.110525	210	0.112145	210	0.0812853	210	0.126407	210	0.0887976							220	0.140484	0.14174	0.107754	0.1093	0.0795407	0.122914	0.0867115
									220	0.140484	220	0.14174	220	0.107754	220	0.1093	220	0.0795407	220	0.122914	220	0.0867115							230	0.136531	0.137443	0.105224	0.106703	0.0779478	0.119725	0.0848068
									230	0.136531	230	0.137443	230	0.105224	230	0.106703	230	0.0779478	230	0.119725	230	0.0848068							240	0.132907	0.133504	0.102905	0.104322	0.0764876	0.116802	0.0830608
									240	0.132907	240	0.133504	240	0.102905	240	0.104322	240	0.0764876	240	0.116802	240	0.0830608							250	0.129574	0.12988	0.100772	0.102132	0.0751442	0.114113	0.0814545
									250	0.129574	250	0.12988	250	0.100772	250	0.102132	250	0.0751442	250	0.114113	250	0.0814545							260	0.126497	0.126534	0.098802	0.10011	0.0739042	0.11163	0.0799718
									260	0.126497	260	0.126534	260	0.098802	260	0.10011	260	0.0739042	260	0.11163	260	0.0799718							270	0.123647	0.123437	0.0969784	0.0982383	0.072756	0.109331	0.0785989
									270	0.123647	270	0.123437	270	0.0969784	270	0.0982383	270	0.072756	270	0.109331	270	0.0785989							280	0.121001	0.120561	0.0952851	0.0964999	0.0716898	0.107197	0.077324
									280	0.121001	280	0.120561	280	0.0952851	280	0.0964999	280	0.0716898	280	0.107197	280	0.077324
									GWP																					NaNMC	NaMVP	NaMMO	NaNMMT	NaPBA	LiNMC	LiFP
									29.8758	10	25.3008	10	26.4251	10	22.9829	10	23.6543	10	19.1056	10	16.7737	10							100	37.7093	34.8052	36.7699	33.5402	27.6232	37.7008	26.1139
									100	37.7093	100	34.8052	100	36.7699	100	33.5402	100	27.6232	100	37.7008	100	26.1139							110	35.0359	32.2944	34.1819	31.2458	25.7653	35.0281	24.3932
									110	35.0359	110	32.2944	110	34.1819	110	31.2458	110	25.7653	110	35.0281	110	24.3932							120	32.8081	30.202	32.0252	29.3338	24.217	32.8009	22.9592
									120	32.8081	120	30.202	120	32.0252	120	29.3338	120	24.217	120	32.8009	120	22.9592							130	30.923	28.4315	30.2004	27.716	22.9069	30.9164	21.7459
									130	30.923	130	28.4315	130	30.2004	130	27.716	130	22.9069	130	30.9164	130	21.7459							140	29.3072	26.914	28.6362	26.3292	21.784	29.301	20.7059
									140	29.3072	140	26.914	140	28.6362	140	26.3292	140	21.784	140	29.301	140	20.7059							150	27.9068	25.5988	27.2805	25.1274	20.8108	27.9011	19.8046
									150	27.9068	150	25.5988	150	27.2805	150	25.1274	150	20.8108	150	27.9011	150	19.8046							160	26.6815	24.448	26.0944	24.0758	19.9592	26.6761	19.0159
									160	26.6815	160	24.448	160	26.0944	160	24.0758	160	19.9592	160	26.6761	160	19.0159							170	25.6003	23.4326	25.0477	23.1479	19.2079	25.5953	18.32
									170	25.6003	170	23.4326	170	25.0477	170	23.1479	170	19.2079	170	25.5953	170	18.32							180	24.6393	22.53	24.1174	22.3231	18.54	24.6345	17.7015
									180	24.6393	180	22.53	180	24.1174	180	22.3231	180	18.54	180	24.6345	180	17.7015							190	23.7794	21.7224	23.285	21.5851	17.9424	23.7749	17.148
									190	23.7794	190	21.7224	190	23.285	190	21.5851	190	17.9424	190	23.7749	190	17.148							200	23.0055	20.9956	22.5358	20.921	17.4046	23.0013	16.6499
									200	23.0055	200	20.9956	200	22.5358	200	20.921	200	17.4046	200	23.0013	200	16.6499							210	22.3053	20.338	21.858	20.3201	16.918	22.3013	16.1992
									210	22.3053	210	20.338	210	21.858	210	20.3201	210	16.918	210	22.3013	210	16.1992							220	21.6688	19.7401	21.2418	19.7738	16.4756	21.6649	15.7895
									220	21.6688	220	19.7401	220	21.2418	220	19.7738	220	16.4756	220	21.6649	220	15.7895							230	21.0876	19.1943	20.6792	19.275	16.0717	21.0839	15.4155
									230	21.0876	230	19.1943	230	20.6792	230	19.275	230	16.0717	230	21.0839	230	15.4155							240	20.5549	18.6939	20.1635	18.8178	15.7015	20.5513	15.0726
									240	20.5549	240	18.6939	240	20.1635	240	18.8178	240	15.7015	240	20.5513	240	15.0726							250	20.0648	18.2336	19.689	18.3971	15.3608	20.0613	14.7571
									250	20.0648	250	18.2336	250	19.689	250	18.3971	250	15.3608	250	20.0613	250	14.7571							260	19.6123	17.8087	19.2511	18.0088	15.0464	19.6091	14.4659
									260	19.6123	260	17.8087	260	19.2511	260	18.0088	260	15.0464	260	19.6091	260	14.4659							270	19.1934	17.4153	18.8455	17.6493	14.7553	19.1903	14.1963
									270	19.1934	270	17.4153	270	18.8455	270	17.6493	270	14.7553	270	19.1903	270	14.1963							280	18.8044	17.0499	18.469	17.3155	14.485	18.8014	13.9459
									280	18.8044	280	17.0499	280	18.469	280	17.3155	280	14.485	280	18.8014	280	13.9459
									Htox																					NaNMC	NaMVP	NaMMO	NaNMMT	NaPBA	LiNMC	LiFP
									0.0225696	10	0.0449634	10	0.0138612	10	0.0138054	10	0.0114036	10	0.0157087	10	0.0129249	10							100	0.0277905	0.0648346	0.0170978	0.0178429	0.0124432	0.0286481	0.0186093
									100	0.0277905	100	0.0648346	100	0.0170978	100	0.0178429	100	0.0124432	100	0.0286481	100	0.0186093							110	0.0260087	0.0595851	0.0162881	0.0169655	0.0119566	0.0267883	0.0175621
									110	0.0260087	110	0.0595851	110	0.0162881	110	0.0169655	110	0.0119566	110	0.0267883	110	0.0175621							120	0.0245239	0.0552105	0.0156133	0.0162342	0.011551	0.0252385	0.0166894
									120	0.0245239	120	0.0552105	120	0.0156133	120	0.0162342	120	0.011551	120	0.0252385	120	0.0166894							130	0.0232675	0.0515089	0.0150424	0.0156155	0.0112079	0.0239271	0.015951
									130	0.0232675	130	0.0515089	130	0.0150424	130	0.0156155	130	0.0112079	130	0.0239271	130	0.015951							140	0.0221906	0.0483361	0.014553	0.0150852	0.0109137	0.0228031	0.015318
									140	0.0221906	140	0.0483361	140	0.014553	140	0.0150852	140	0.0109137	140	0.0228031	140	0.015318							150	0.0212573	0.0455864	0.0141288	0.0146256	0.0106588	0.021829	0.0147695
									150	0.0212573	150	0.0455864	150	0.0141288	150	0.0146256	150	0.0106588	150	0.021829	150	0.0147695							160	0.0204406	0.0431803	0.0137577	0.0142234	0.0104357	0.0209766	0.0142895
									160	0.0204406	160	0.0431803	160	0.0137577	160	0.0142234	160	0.0104357	160	0.0209766	160	0.0142895							170	0.01972	0.0410574	0.0134302	0.0138685	0.0102389	0.0202245	0.013866
									170	0.01972	170	0.0410574	170	0.0134302	170	0.0138685	170	0.0102389	170	0.0202245	170	0.013866							180	0.0190795	0.0391703	0.0131392	0.0135531	0.010064	0.0195559	0.0134896
									180	0.0190795	180	0.0391703	180	0.0131392	180	0.0135531	180	0.010064	180	0.0195559	180	0.0134896							190	0.0185064	0.0374818	0.0128787	0.0132709	0.00990744	0.0189578	0.0131527
									190	0.0185064	190	0.0374818	190	0.0128787	190	0.0132709	190	0.00990744	190	0.0189578	190	0.0131527							200	0.0179907	0.0359622	0.0126443	0.0130169	0.00976656	0.0184194	0.0128496
									200	0.0179907	200	0.0359622	200	0.0126443	200	0.0130169	200	0.00976656	200	0.0184194	200	0.0128496							210	0.017524	0.0345874	0.0124322	0.0127871	0.0096391	0.0179323	0.0125753
									210	0.017524	210	0.0345874	210	0.0124322	210	0.0127871	210	0.0096391	210	0.0179323	210	0.0125753							220	0.0170998	0.0333375	0.0122395	0.0125781	0.00952323	0.0174896	0.012326
									220	0.0170998	220	0.0333375	220	0.0122395	220	0.0125781	220	0.00952323	220	0.0174896	220	0.012326							230	0.0167124	0.0321963	0.0120634	0.0123874	0.00941743	0.0170853	0.0120983
									230	0.0167124	230	0.0321963	230	0.0120634	230	0.0123874	230	0.00941743	230	0.0170853	230	0.0120983							240	0.0163573	0.0311502	0.0119021	0.0122125	0.00932045	0.0167147	0.0118896
									240	0.0163573	240	0.0311502	240	0.0119021	240	0.0122125	240	0.00932045	240	0.0167147	240	0.0118896							250	0.0160307	0.0301878	0.0117536	0.0120517	0.00923123	0.0163737	0.0116976
									250	0.0160307	250	0.0301878	250	0.0117536	250	0.0120517	250	0.00923123	250	0.0163737	250	0.0116976							260	0.0157292	0.0292994	0.0116166	0.0119032	0.00914887	0.016059	0.0115204
									260	0.0157292	260	0.0292994	260	0.0116166	260	0.0119032	260	0.00914887	260	0.016059	260	0.0115204							270	0.01545	0.0284768	0.0114897	0.0117657	0.00907261	0.0157676	0.0113563
									270	0.01545	270	0.0284768	270	0.0114897	270	0.0117657	270	0.00907261	270	0.0157676	270	0.0113563							280	0.0151907	0.027713	0.0113719	0.011638	0.0090018	0.015497	0.011204
									280	0.0151907	280	0.027713	280	0.0113719	280	0.011638	280	0.0090018	280	0.015497	280	0.011204
									RDP																					NaNMC	NaMVP	NaMMO	NaNMMT	NaPBA	LiNMC	LiFP
									0.00439462	10	0.00196094	10	0.00183124	10	0.00242753	10	0.00156454	10	0.00193006	10	0.0023865	10							100	0.00553326	0.00241814	0.00215804	0.00326803	0.00167902	0.00308553	0.00364998
									100	0.00553326	100	0.00241814	100	0.00215804	100	0.00326803	100	0.00167902	100	0.00308553	100	0.00364998							110	0.00514467	0.00229736	0.00207628	0.00308536	0.00162543	0.00291946	0.00341721
									110	0.00514467	110	0.00229736	110	0.00207628	110	0.00308536	110	0.00162543	110	0.00291946	110	0.00341721							120	0.00482084	0.00219671	0.00200815	0.00293314	0.00158077	0.00278107	0.00322324
									120	0.00482084	120	0.00219671	120	0.00200815	120	0.00293314	120	0.00158077	120	0.00278107	120	0.00322324							130	0.00454683	0.00211154	0.0019505	0.00280434	0.00154298	0.00266396	0.00305911
									130	0.00454683	130	0.00211154	130	0.0019505	130	0.00280434	130	0.00154298	130	0.00266396	130	0.00305911							140	0.00431196	0.00203854	0.00190109	0.00269394	0.00151059	0.00256359	0.00291842
									140	0.00431196	140	0.00203854	140	0.00190109	140	0.00269394	140	0.00151059	140	0.00256359	140	0.00291842							150	0.00410842	0.00197528	0.00185827	0.00259826	0.00148252	0.0024766	0.0027965
									150	0.00410842	150	0.00197528	150	0.00185827	150	0.00259826	150	0.00148252	150	0.0024766	150	0.0027965							160	0.00393031	0.00191992	0.00182079	0.00251454	0.00145796	0.00240048	0.00268981
									160	0.00393031	160	0.00191992	160	0.00182079	160	0.00251454	160	0.00145796	160	0.00240048	160	0.00268981							170	0.00377316	0.00187107	0.00178773	0.00244067	0.00143629	0.00233332	0.00259568
									170	0.00377316	170	0.00187107	170	0.00178773	170	0.00244067	170	0.00143629	170	0.00233332	170	0.00259568							180	0.00363347	0.00182765	0.00175834	0.002375	0.00141703	0.00227362	0.002512
									180	0.00363347	180	0.00182765	180	0.00175834	180	0.002375	180	0.00141703	180	0.00227362	180	0.002512							190	0.00350848	0.0017888	0.00173205	0.00231625	0.00139979	0.0022202	0.00243714
									190	0.00350848	190	0.0017888	190	0.00173205	190	0.00231625	190	0.00139979	190	0.0022202	190	0.00243714							200	0.00339599	0.00175384	0.00170838	0.00226338	0.00138428	0.00217213	0.00236976
									200	0.00339599	200	0.00175384	200	0.00170838	200	0.00226338	200	0.00138428	200	0.00217213	200	0.00236976							210	0.00329422	0.00172221	0.00168697	0.00221553	0.00137024	0.00212863	0.0023088
									210	0.00329422	210	0.00172221	210	0.00168697	210	0.00221553	210	0.00137024	210	0.00212863	210	0.0023088							220	0.00320169	0.00169345	0.0016675	0.00217204	0.00135748	0.00208909	0.00225337
									220	0.00320169	220	0.00169345	220	0.0016675	220	0.00217204	220	0.00135748	220	0.00208909	220	0.00225337							230	0.00311722	0.00166719	0.00164973	0.00213233	0.00134583	0.00205299	0.00220277
									230	0.00311722	230	0.00166719	230	0.00164973	230	0.00213233	230	0.00134583	230	0.00205299	230	0.00220277							240	0.00303978	0.00164312	0.00163344	0.00209593	0.00133515	0.00201989	0.00215639
									240	0.00303978	240	0.00164312	240	0.00163344	240	0.00209593	240	0.00133515	240	0.00201989	240	0.00215639							250	0.00296854	0.00162098	0.00161845	0.00206244	0.00132533	0.00198945	0.00211371
									250	0.00296854	250	0.00162098	250	0.00161845	250	0.00206244	250	0.00132533	250	0.00198945	250	0.00211371							260	0.00290278	0.00160054	0.00160461	0.00203153	0.00131626	0.00196134	0.00207432
									260	0.00290278	260	0.00160054	260	0.00160461	260	0.00203153	260	0.00131626	260	0.00196134	260	0.00207432							270	0.00284188	0.00158161	0.0015918	0.00200291	0.00130786	0.00193532	0.00203785
									270	0.00284188	270	0.00158161	270	0.0015918	270	0.00200291	270	0.00130786	270	0.00193532	270	0.00203785							280	0.00278534	0.00156404	0.00157991	0.00197633	0.00130007	0.00191115	0.00200398
									280	0.00278534	280	0.00156404	280	0.00157991	280	0.00197633	280	0.00130007	280	0.00191115	280	0.00200398
									3 D Plott
									AP	NaNMC
									0.196305	1000	2000	3000	4000	5000	6000	7000
									0.9	0.663337	0.363335	0.263335	0.213334	0.183334	0.163334	0.149048
									0.91	0.649784	0.353079	0.254177	0.204726	0.175056	0.155275	0.141147
									0.92	0.636525	0.343045	0.245219	0.196305	0.166957	0.147392	0.133417
									0.93	0.623552	0.333228	0.236453	0.188065	0.159033	0.139678	0.125853
									0.94	0.610855	0.323619	0.227874	0.180001	0.151277	0.132128	0.11845
									0.95	0.598425	0.314212	0.219475	0.172106	0.143685	0.124737	0.111204
									0.96	0.586253	0.305002	0.211251	0.164376	0.136251	0.117501	0.104108
									0.97	0.574333	0.295981	0.203197	0.156805	0.12897	0.110413	0.0971581
									GWP
									29.8758	1000	2000	3000	4000	5000	6000	7000
									0.9	98.8217	54.7147	40.0124	32.6612	28.2506	25.3101	23.2098
									0.91	96.6866	53.0643	38.5236	31.2532	26.891	23.9828	21.9056
									0.92	94.5979	51.4498	37.0671	29.8758	25.561	22.6844	20.6298
									0.93	92.5542	49.87	35.642	28.528	24.2596	21.414	19.3814
									0.94	90.5539	48.3239	34.2472	27.2089	22.9858	20.1705	18.1596
									0.95	88.5958	46.8103	32.8818	25.9175	21.7389	18.9532	16.9635
									0.96	86.6784	45.3282	31.5448	24.653	20.518	17.7613	15.7923
									0.97	84.8006	43.8766	30.2353	23.4147	19.3223	16.594	14.6452
									Htox
									0.0225696	1000	2000	3000	4000	5000	6000	7000
									0.9	0.0692593	0.0398626	0.0300638	0.0251643	0.0222247	0.0202649	0.0188651
									0.91	0.0674631	0.0383895	0.0286983	0.0238527	0.0209453	0.0190071	0.0176226
									0.92	0.0657059	0.0369484	0.0273625	0.0225696	0.0196938	0.0177767	0.0164072
									0.93	0.0639866	0.0355382	0.0260554	0.0213141	0.0184692	0.0165727	0.015218
									0.94	0.0623038	0.0341581	0.0247762	0.0200852	0.0172707	0.0153943	0.014054
									0.95	0.0606564	0.032807	0.0235239	0.0188823	0.0160974	0.0142407	0.0129146
									0.96	0.0590434	0.0314841	0.0222976	0.0177044	0.0149485	0.0131112	0.0117989
									0.97	0.0574637	0.0301884	0.0210967	0.0165508	0.0138233	0.012005	0.0107061
									RDP
									0.00439462	1000	2000	3000	4000	5000	6000	7000
									0.9	0.0144307	0.00801953	0.00588248	0.00481395	0.00417283	0.00374542	0.00344013
									0.91	0.0141131	0.00777234	0.00565877	0.00460198	0.00396791	0.00354519	0.00324326
									0.92	0.0138023	0.00753051	0.00543992	0.00439462	0.00376744	0.00334932	0.00305066
									0.93	0.0134982	0.00729389	0.00522577	0.00419172	0.00357128	0.00315766	0.00286221
									0.94	0.0132007	0.00706231	0.00501619	0.00399313	0.0033793	0.00297007	0.00267777
									0.95	0.0129093	0.00683559	0.00481102	0.00379873	0.00319135	0.00278644	0.00249721
									0.96	0.0126241	0.00661361	0.00461012	0.00360837	0.00300732	0.00260663	0.00232041
									0.97	0.0123447	0.00639619	0.00441336	0.00342194	0.00282709	0.00243052	0.00214726

## Sheet: Heat map article
		Reference min and max values in general																		Reference min and max values NMC
		Cycle life	NaNMC	NaMVP	NaMMO	NaNMMT	NaPBA	LiNMC	LiFP		NaNMC	NaMVP	NaMMO	NaNMMT	NaPBA	LiNMC	LiFP			Cycle life	NaNMC	NaMVP	NaMMO	NaNMMT	NaPBA	LiNMC	LiFP		NaNMC	NaMVP	NaMMO	NaNMMT	NaPBA	LiNMC	LiFP		Cycle life	NaNMC	NaMVP	NaMMO	NaNMMT	NaPBA	LiNMC	LiFP	NMC reference	NaNMC	NaMVP	NaMMO	NaNMMT
		Cycles	GWP gCO2 eq /kWh								ADP mgSb eq./kWh									Cycles	GWP gCO2 eq /kWh								ADP mgSb eq./kWh								Cycle life	NaNMC	NaMVP	NaMMO	NaNMMT	NaPBA	LiNMC622	LiFP	NMC reference @ 4000 cycles	NaNMC	NaMVP	NaMMO	NaNMMT
		1000	94.5979	133.99	80.7953	67.0266	122.465	51.5174	74.3001		0.0138023	0.00718937	0.00354881	0.00593397	0.00441456	0.00394408	0.0101682			1000	94.5979	133.99	80.7953	67.0266	122.465	51.5174	74.3001		0.0138023	0.00718937	0.00354881	0.00593397	0.00441456	0.00394408	0.0101682		1000	94.5979	133.99	80.7953	67.0266	122.465	51.5174	74.3001	19.1056	0.0138023	0.00718937	0.00354881	0.00593397
		1500	65.8325	91.7221	56.6308	47.4516	84.0386	37.1122	51.9287		0.00962111	0.00515609	0.00278544	0.00437555	0.00330622	0.00304896	0.00714201			1500	65.8325	91.7221	56.6308	47.4516	84.0386	37.1122	51.9287		0.00962111	0.00515609	0.00278544	0.00437555	0.00330622	0.00304896	0.00714201		1500	65.8325	91.7221	56.6308	47.4516	84.0386	37.1122	51.9287	19.1056	0.00962111	0.00515609	0.00278544	0.00437555
		2000	51.4498	70.5881	44.5485	37.6641	64.8254	29.9096	40.743		0.00753051	0.00413945	0.00240376	0.00359635	0.00275205	0.0026014	0.00562889			2000	51.4498	70.5881	44.5485	37.6641	64.8254	29.9096	40.743		0.00753051	0.00413945	0.00240376	0.00359635	0.00275205	0.0026014	0.00562889		2000	51.4498	70.5881	44.5485	37.6641	64.8254	29.9096	40.743	19.1056	0.00753051	0.00413945	0.00240376	0.00359635
		2500	42.8202	57.9076	37.2992	31.7917	53.2975	25.588	34.0316		0.00627616	0.00352947	0.00217476	0.00312882	0.00241955	0.00233286	0.00472102			2500	42.8202	57.9076	37.2992	31.7917	53.2975	25.588	34.0316		0.00627616	0.00352947	0.00217476	0.00312882	0.00241955	0.00233286	0.00472102		2500	42.8202	57.9076	37.2992	31.7917	53.2975	25.588	34.0316	19.1056	0.00627616	0.00352947	0.00217476	0.00312882
		3000	37.0671	49.454	32.4662	27.8767	45.6123	22.7069	29.5573		0.00543992	0.00312282	0.00202208	0.00281714	0.00219788	0.00215384	0.00411577			3000	37.0671	49.454	32.4662	27.8767	45.6123	22.7069	29.5573		0.00543992	0.00312282	0.00202208	0.00281714	0.00219788	0.00215384	0.00411577		3000	37.0671	49.454	32.4662	27.8767	45.6123	22.7069	29.5573	19.1056	0.00543992	0.00312282	0.00202208	0.00281714
		3500	32.9578	43.4157	29.0142	25.0803	40.1228	20.6491	26.3614		0.0048426	0.00283235	0.00191303	0.00259451	0.00203954	0.00202597	0.00368346			3500	32.9578	43.4157	29.0142	25.0803	40.1228	20.6491	26.3614		0.0048426	0.00283235	0.00191303	0.00259451	0.00203954	0.00202597	0.00368346		3500	32.9578	43.4157	29.0142	25.0803	40.1228	20.6491	26.3614	19.1056	0.0048426	0.00283235	0.00191303	0.00259451
		4000	29.8758	38.887	26.4251	22.9829	36.0057	19.1056	23.9645		0.00439462	0.0026145	0.00183124	0.00242753	0.00192079	0.00193006	0.00335922			4000	29.8758	38.887	26.4251	22.9829	36.0057	19.1056	23.9645		0.00439462	0.0026145	0.00183124	0.00242753	0.00192079	0.00193006	0.00335922		4000	29.8758	38.887	26.4251	22.9829	36.0057	19.1056	23.9645	19.1056	0.00439462	0.0026145	0.00183124	0.00242753
		4500	27.4787	35.3647	24.4114	21.3517	32.8035	17.9052	22.1002		0.00404619	0.00244506	0.00176763	0.00229767	0.00182843	0.00185547	0.00310703			4500	27.4787	35.3647	24.4114	21.3517	32.8035	17.9052	22.1002		0.00404619	0.00244506	0.00176763	0.00229767	0.00182843	0.00185547	0.00310703		4500	27.4787	35.3647	24.4114	21.3517	32.8035	17.9052	22.1002	19.1056	0.00404619	0.00244506	0.00176763	0.00229767
		5000	25.561	32.5468	22.8004	20.0467	30.2417	16.9449	20.6087		0.00376744	0.0023095	0.00171674	0.00219377	0.00175454	0.00179579	0.00290528			5000	25.561	32.5468	22.8004	20.0467	30.2417	16.9449	20.6087		0.00376744	0.0023095	0.00171674	0.00219377	0.00175454	0.00179579	0.00290528		5000	25.561	32.5468	22.8004	20.0467	30.2417	16.9449	20.6087	19.1056	0.00376744	0.0023095	0.00171674	0.00219377
		5500	23.992	30.2412	21.4824	18.979	28.1457	16.1591	19.3885		0.00353937	0.0021986	0.0016751	0.00210877	0.00169409	0.00174697	0.00274021			5500	23.992	30.2412	21.4824	18.979	28.1457	16.1591	19.3885		0.00353937	0.0021986	0.0016751	0.00210877	0.00169409	0.00174697	0.00274021		5500	23.992	30.2412	21.4824	18.979	28.1457	16.1591	19.3885	19.1056	0.00353937	0.0021986	0.0016751	0.00210877
		6000	22.6844	28.32	20.384	18.0892	26.3991	15.5043	18.3716		0.00334932	0.00210618	0.0016404	0.00203793	0.00164371	0.00170628	0.00260266			6000	22.6844	28.32	20.384	18.0892	26.3991	15.5043	18.3716		0.00334932	0.00210618	0.0016404	0.00203793	0.00164371	0.00170628	0.00260266		6000	22.6844	28.32	20.384	18.0892	26.3991	15.5043	18.3716	19.1056	0.00334932	0.00210618	0.0016404	0.00203793
		6500	21.5781	26.6943	19.4546	17.3363	24.9212	14.9503	17.5112		0.0031885	0.00202797	0.00161104	0.00197799	0.00160108	0.00167185	0.00248626			6500	21.5781	26.6943	19.4546	17.3363	24.9212	14.9503	17.5112		0.0031885	0.00202797	0.00161104	0.00197799	0.00160108	0.00167185	0.00248626		6500	21.5781	26.6943	19.4546	17.3363	24.9212	14.9503	17.5112	19.1056	0.0031885	0.00202797	0.00161104	0.00197799
		7000	20.6298	25.3008	18.658	16.691	23.6543	14.4754	16.7737		0.00305066	0.00196094	0.00158588	0.00192661	0.00156454	0.00164234	0.0023865			7000	20.6298	25.3008	18.658	16.691	23.6543	14.4754	16.7737		0.00305066	0.00196094	0.00158588	0.00192661	0.00156454	0.00164234	0.0023865		7000	20.6298	25.3008	18.658	16.691	23.6543	14.4754	16.7737	19.1056	0.00305066	0.00196094	0.00158588	0.00192661
		7500	20.1231	24.5564	18.2324	16.3462	22.9776	14.2217	16.3796		0.00297702	0.00192513	0.00157243	0.00189917	0.00154502	0.00162658	0.0023332			7500	20.1231	24.5564	18.2324	16.3462	22.9776	14.2217	16.3796		0.00297702	0.00192513	0.00157243	0.00189917	0.00154502	0.00162658	0.0023332		7500	20.1231	24.5564	18.2324	16.3462	22.9776	14.2217	16.3796	19.1056	0.00297702	0.00192513	0.00157243	0.00189917
		8000	20.1231	24.5564	18.2324	16.3462	22.9776	14.2217	16.3796		0.00297702	0.00192513	0.00157243	0.00189917	0.00154502	0.00162658	0.0023332			8000	20.1231	24.5564	18.2324	16.3462	22.9776	14.2217	16.3796		0.00297702	0.00192513	0.00157243	0.00189917	0.00154502	0.00162658	0.0023332		8000	20.1231	24.5564	18.2324	16.3462	22.9776	14.2217	16.3796	19.1056	0.00297702	0.00192513	0.00157243	0.00189917
		8500	20.1231	24.5564	18.2324	16.3462	22.9776	14.2217	16.3796		0.00297702	0.00192513	0.00157243	0.00189917	0.00154502	0.00162658	0.0023332			8500	20.1231	24.5564	18.2324	16.3462	22.9776	14.2217	16.3796		0.00297702	0.00192513	0.00157243	0.00189917	0.00154502	0.00162658	0.0023332		8500	20.1231	24.5564	18.2324	16.3462	22.9776	14.2217	16.3796	19.1056	0.00297702	0.00192513	0.00157243	0.00189917
		9000	20.1231	24.5564	18.2324	16.3462	22.9776	14.2217	16.3796		0.00297702	0.00192513	0.00157243	0.00189917	0.00154502	0.00162658	0.0023332			9000	20.1231	24.5564	18.2324	16.3462	22.9776	14.2217	16.3796		0.00297702	0.00192513	0.00157243	0.00189917	0.00154502	0.00162658	0.0023332		9000	20.1231	24.5564	18.2324	16.3462	22.9776	14.2217	16.3796	19.1056	0.00297702	0.00192513	0.00157243	0.00189917
		9500	20.1231	24.5564	18.2324	16.3462	22.9776	14.2217	16.3796		0.00297702	0.00192513	0.00157243	0.00189917	0.00154502	0.00162658	0.0023332			9500	20.1231	24.5564	18.2324	16.3462	22.9776	14.2217	16.3796		0.00297702	0.00192513	0.00157243	0.00189917	0.00154502	0.00162658	0.0023332		9500	20.1231	24.5564	18.2324	16.3462	22.9776	14.2217	16.3796	19.1056	0.00297702	0.00192513	0.00157243	0.00189917
		10000	20.1231	24.5564	18.2324	16.3462	22.9776	14.2217	16.3796		0.00297702	0.00192513	0.00157243	0.00189917	0.00154502	0.00162658	0.0023332			10000	20.1231	24.5564	18.2324	16.3462	22.9776	14.2217	16.3796		0.00297702	0.00192513	0.00157243	0.00189917	0.00154502	0.00162658	0.0023332		10000	20.1231	24.5564	18.2324	16.3462	22.9776	14.2217	16.3796	19.1056	0.00297702	0.00192513	0.00157243	0.00189917
			AP mmolc H+ eq /kWh								HTP mCTUh/kWh										AP mmolc H+ eq /kWh								HTP mCTUh/kWh								0	AP mmolc H+ eq /kWh	0	0	0	0	0	0	NMC reference @ 4000 cycles	HTP mCTUh/kWh	0	0	0
		1000	0.636525	1.04121	0.375554	0.355346	0.49755	0.286772	0.384638		0.0657059	0.272205	0.0308723	0.0306494	0.0372861	0.0382623	0.047935			1000	0.636525	1.04121	0.375554	0.355346	0.49755	0.286772	0.384638		0.0657059	0.272205	0.0308723	0.0306494	0.0372861	0.0382623	0.047935		1000	0.636525	1.04121	0.375554	0.355346	0.49755	0.286772	0.384638	0.108867	0.0657059	0.272205	0.0308723	0.0306494
		1500	0.440872	0.708441	0.266891	0.253419	0.346001	0.207703	0.270726		0.0465342	0.183833	0.0233118	0.0231632	0.0272207	0.0282385	0.0343199			1500	0.440872	0.708441	0.266891	0.253419	0.346001	0.207703	0.270726		0.0465342	0.183833	0.0233118	0.0231632	0.0272207	0.0282385	0.0343199		1500	0.440872	0.708441	0.266891	0.253419	0.346001	0.207703	0.270726	0.108867	0.0465342	0.183833	0.0233118	0.0231632
		2000	0.343045	0.542056	0.21256	0.202456	0.270227	0.168168	0.21377		0.0369484	0.139647	0.0195316	0.0194201	0.022188	0.0232266	0.0275124			2000	0.343045	0.542056	0.21256	0.202456	0.270227	0.168168	0.21377		0.0369484	0.139647	0.0195316	0.0194201	0.022188	0.0232266	0.0275124		2000	0.343045	0.542056	0.21256	0.202456	0.270227	0.168168	0.21377	0.108867	0.0369484	0.139647	0.0195316	0.0194201
		2500	0.284349	0.442226	0.179961	0.171878	0.224762	0.144448	0.179597		0.0311969	0.113136	0.0172634	0.0171742	0.0191684	0.0202194	0.0234279			2500	0.284349	0.442226	0.179961	0.171878	0.224762	0.144448	0.179597		0.0311969	0.113136	0.0172634	0.0171742	0.0191684	0.0202194	0.0234279		2500	0.284349	0.442226	0.179961	0.171878	0.224762	0.144448	0.179597	0.108867	0.0311969	0.113136	0.0172634	0.0171742
		3000	0.245219	0.375672	0.158228	0.151492	0.194452	0.128634	0.156815		0.0273625	0.0954615	0.0157513	0.015677	0.0171553	0.0182146	0.0207049			3000	0.245219	0.375672	0.158228	0.151492	0.194452	0.128634	0.156815		0.0273625	0.0954615	0.0157513	0.015677	0.0171553	0.0182146	0.0207049		3000	0.245219	0.375672	0.158228	0.151492	0.194452	0.128634	0.156815	0.108867	0.0273625	0.0954615	0.0157513	0.015677
		3500	0.217268	0.328133	0.142705	0.136931	0.172802	0.117338	0.140542		0.0246237	0.0828369	0.0146712	0.0146075	0.0157174	0.0167827	0.0187599			3500	0.217268	0.328133	0.142705	0.136931	0.172802	0.117338	0.140542		0.0246237	0.0828369	0.0146712	0.0146075	0.0157174	0.0167827	0.0187599		3500	0.217268	0.328133	0.142705	0.136931	0.172802	0.117338	0.140542	0.108867	0.0246237	0.0828369	0.0146712	0.0146075
		4000	0.196305	0.29248	0.131062	0.126011	0.156565	0.108867	0.128337		0.0225696	0.0733686	0.0138612	0.0138054	0.0146389	0.0157087	0.0173012			4000	0.196305	0.29248	0.131062	0.126011	0.156565	0.108867	0.128337		0.0225696	0.0733686	0.0138612	0.0138054	0.0146389	0.0157087	0.0173012		4000	0.196305	0.29248	0.131062	0.126011	0.156565	0.108867	0.128337	0.108867	0.0225696	0.0733686	0.0138612	0.0138054
		4500	0.180001	0.264749	0.122007	0.117517	0.143936	0.102278	0.118844		0.0209719	0.0660043	0.0132311	0.0131816	0.0138002	0.0148734	0.0161666			4500	0.180001	0.264749	0.122007	0.117517	0.143936	0.102278	0.118844		0.0209719	0.0660043	0.0132311	0.0131816	0.0138002	0.0148734	0.0161666		4500	0.180001	0.264749	0.122007	0.117517	0.143936	0.102278	0.118844	0.108867	0.0209719	0.0660043	0.0132311	0.0131816
		5000	0.166957	0.242564	0.114763	0.110721	0.133833	0.0970065	0.11125		0.0196938	0.0601128	0.0127271	0.0126825	0.0131291	0.0142051	0.0152589			5000	0.166957	0.242564	0.114763	0.110721	0.133833	0.0970065	0.11125		0.0196938	0.0601128	0.0127271	0.0126825	0.0131291	0.0142051	0.0152589		5000	0.166957	0.242564	0.114763	0.110721	0.133833	0.0970065	0.11125	0.108867	0.0196938	0.0601128	0.0127271	0.0126825
		5500	0.156285	0.224413	0.108836	0.105162	0.125566	0.0926937	0.105037		0.0186481	0.0552926	0.0123147	0.0122742	0.0125801	0.0136583	0.0145163			5500	0.156285	0.224413	0.108836	0.105162	0.125566	0.0926937	0.105037		0.0186481	0.0552926	0.0123147	0.0122742	0.0125801	0.0136583	0.0145163		5500	0.156285	0.224413	0.108836	0.105162	0.125566	0.0926937	0.105037	0.108867	0.0186481	0.0552926	0.0123147	0.0122742
		6000	0.147392	0.209288	0.103897	0.100529	0.118678	0.0890996	0.099859		0.0177767	0.0512757	0.0119711	0.0119339	0.0121226	0.0132027	0.0138974			6000	0.147392	0.209288	0.103897	0.100529	0.118678	0.0890996	0.099859		0.0177767	0.0512757	0.0119711	0.0119339	0.0121226	0.0132027	0.0138974		6000	0.147392	0.209288	0.103897	0.100529	0.118678	0.0890996	0.099859	0.108867	0.0177767	0.0512757	0.0119711	0.0119339
		6500	0.139867	0.196489	0.0997173	0.0966085	0.112849	0.0860585	0.0954778		0.0170393	0.0478768	0.0116803	0.011646	0.0117355	0.0128172	0.0133737			6500	0.139867	0.196489	0.0997173	0.0966085	0.112849	0.0860585	0.0954778		0.0170393	0.0478768	0.0116803	0.011646	0.0117355	0.0128172	0.0133737		6500	0.139867	0.196489	0.0997173	0.0966085	0.112849	0.0860585	0.0954778	0.108867	0.0170393	0.0478768	0.0116803	0.011646
		7000	0.133417	0.185518	0.096135	0.0932482	0.107853	0.0834518	0.0917224		0.0164072	0.0449634	0.011431	0.0113992	0.0114036	0.0124867	0.0129249			7000	0.133417	0.185518	0.096135	0.0932482	0.107853	0.0834518	0.0917224		0.0164072	0.0449634	0.011431	0.0113992	0.0114036	0.0124867	0.0129249		7000	0.133417	0.185518	0.096135	0.0932482	0.107853	0.0834518	0.0917224	0.108867	0.0164072	0.0449634	0.011431	0.0113992
		7500	0.129971	0.179657	0.0942212	0.0914531	0.105184	0.0820592	0.0897162		0.0160696	0.043407	0.0112979	0.0112673	0.0112264	0.0123102	0.0126851			7500	0.129971	0.179657	0.0942212	0.0914531	0.105184	0.0820592	0.0897162		0.0160696	0.043407	0.0112979	0.0112673	0.0112264	0.0123102	0.0126851		7500	0.129971	0.179657	0.0942212	0.0914531	0.105184	0.0820592	0.0897162	0.108867	0.0160696	0.043407	0.0112979	0.0112673
		8000	0.129971	0.179657	0.0942212	0.0914531	0.105184	0.0820592	0.0897162		0.0160696	0.043407	0.0112979	0.0112673	0.0112264	0.0123102	0.0126851			8000	0.129971	0.179657	0.0942212	0.0914531	0.105184	0.0820592	0.0897162		0.0160696	0.043407	0.0112979	0.0112673	0.0112264	0.0123102	0.0126851		8000	0.129971	0.179657	0.0942212	0.0914531	0.105184	0.0820592	0.0897162	0.108867	0.0160696	0.043407	0.0112979	0.0112673
		8500	0.129971	0.179657	0.0942212	0.0914531	0.105184	0.0820592	0.0897162		0.0160696	0.043407	0.0112979	0.0112673	0.0112264	0.0123102	0.0126851			8500	0.129971	0.179657	0.0942212	0.0914531	0.105184	0.0820592	0.0897162		0.0160696	0.043407	0.0112979	0.0112673	0.0112264	0.0123102	0.0126851		8500	0.129971	0.179657	0.0942212	0.0914531	0.105184	0.0820592	0.0897162	0.108867	0.0160696	0.043407	0.0112979	0.0112673
		9000	0.129971	0.179657	0.0942212	0.0914531	0.105184	0.0820592	0.0897162		0.0160696	0.043407	0.0112979	0.0112673	0.0112264	0.0123102	0.0126851			9000	0.129971	0.179657	0.0942212	0.0914531	0.105184	0.0820592	0.0897162		0.0160696	0.043407	0.0112979	0.0112673	0.0112264	0.0123102	0.0126851		9000	0.129971	0.179657	0.0942212	0.0914531	0.105184	0.0820592	0.0897162	0.108867	0.0160696	0.043407	0.0112979	0.0112673
		9500	0.129971	0.179657	0.0942212	0.0914531	0.105184	0.0820592	0.0897162		0.0160696	0.043407	0.0112979	0.0112673	0.0112264	0.0123102	0.0126851			9500	0.129971	0.179657	0.0942212	0.0914531	0.105184	0.0820592	0.0897162		0.0160696	0.043407	0.0112979	0.0112673	0.0112264	0.0123102	0.0126851		9500	0.129971	0.179657	0.0942212	0.0914531	0.105184	0.0820592	0.0897162	0.108867	0.0160696	0.043407	0.0112979	0.0112673
		10000	0.129971	0.179657	0.0942212	0.0914531	0.105184	0.0820592	0.0897162		0.0160696	0.043407	0.0112979	0.0112673	0.0112264	0.0123102	0.0126851			10000	0.129971	0.179657	0.0942212	0.0914531	0.105184	0.0820592	0.0897162		0.0160696	0.043407	0.0112979	0.0112673	0.0112264	0.0123102	0.0126851		10000	0.129971	0.179657	0.0942212	0.0914531	0.105184	0.0820592	0.0897162	0.108867	0.0160696	0.043407	0.0112979	0.0112673
		Effi-ciency	NaNMC	NaMVP	NaMMO	NaNMMT	NaPBA	LiNMC	LiFP	0	NaNMC	NaMVP	NaMMO	NaNMMT	NaPBA	LiNMC	LiFP			Effi-ciency	NaNMC	NaMVP	NaMMO	NaNMMT	NaPBA	LiNMC	LiFP		NaNMC	NaMVP	NaMMO	NaNMMT	NaPBA	LiNMC	LiFP
		Eff.	GWP gCO2 eq /kWh								ADP mgSb eq./kWh									Eff.	GWP gCO2 eq /kWh	0	0	0	0	0	0		ADP mgSb eq./kWh	0	0	0	0	0	0
		0.9	32.6612	29.3265	29.1339	25.6152	27.6252	21.6518	20.5151		0.00481395	0.00250882	0.00219361	0.00280315	0.0020992	0.00229462	0.00294856			0.9	32.6612	29.3265	29.1339	25.6152	27.6252	21.6518	20.5151		0.00481395	0.00250882	0.00219361	0.00280315	0.0020992	0.00229462	0.00294856
		0.91	31.2532	27.9551	27.7646	24.2846	26.2725	20.3647	19.2405		0.00460198	0.00232218	0.00201044	0.00261328	0.00191707	0.00211034	0.00275709			0.91	31.2532	27.9551	27.7646	24.2846	26.2725	20.3647	19.2405		0.00460198	0.00232218	0.00201044	0.00261328	0.00191707	0.00211034	0.00275709
		0.92	29.8758	26.6135	26.4251	22.9829	24.9492	19.1056	17.9937		0.00439462	0.0021396	0.00183124	0.00242753	0.00173889	0.00193006	0.00256978			0.92	29.8758	26.6135	26.4251	22.9829	24.9492	19.1056	17.9937		0.00439462	0.0021396	0.00183124	0.00242753	0.00173889	0.00193006	0.00256978
		0.93	28.528	25.3008	25.1144	21.7093	23.6543	17.8736	16.7737		0.00419172	0.00196094	0.0016559	0.00224578	0.00156454	0.00175366	0.0023865			0.93	28.528	25.3008	25.1144	21.7093	23.6543	17.8736	16.7737		0.00419172	0.00196094	0.0016559	0.00224578	0.00156454	0.00175366	0.0023865
		0.94	27.2089	24.016	23.8316	20.4627	22.3871	16.6679	15.5796		0.00399313	0.00178609	0.0014843	0.0020679	0.0013939	0.00158101	0.00220712			0.94	27.2089	24.016	23.8316	20.4627	22.3871	16.6679	15.5796		0.00399313	0.00178609	0.0014843	0.0020679	0.0013939	0.00158101	0.00220712
		0.95	25.9175	22.7583	22.5758	19.2423	21.1465	15.4875	14.4106		0.00379873	0.00161492	0.0013163	0.00189376	0.00122686	0.001412	0.00203151			0.95	25.9175	22.7583	22.5758	19.2423	21.1465	15.4875	14.4106		0.00379873	0.00161492	0.0013163	0.00189376	0.00122686	0.001412	0.00203151
		0.96	24.653	21.5267	21.3462	18.0474	19.9317	14.3317	13.266		0.00360837	0.00144731	0.0011518	0.00172325	0.0010633	0.0012465	0.00185957			0.96	24.653	21.5267	21.3462	18.0474	19.9317	14.3317	13.266		0.00360837	0.00144731	0.0011518	0.00172325	0.0010633	0.0012465	0.00185957
		0.97	23.4147	20.3206	20.1419	16.8771	18.742	13.1997	12.145		0.00342194	0.00128316	0.000990699	0.00155625	0.000903104	0.00108442	0.00169117			0.97	23.4147	20.3206	20.1419	16.8771	18.742	13.1997	12.145		0.00342194	0.00128316	0.000990699	0.00155625	0.000903104	0.00108442	0.00169117
			AP mmolc H+ eq /kWh								HTP mCTUh/kWh										AP mmolc H+ eq /kWh								HTP mCTUh/kWh
		0.9	0.213334	0.210702	0.146642	0.141477	0.130448	0.123953	0.11378		0.0251643	0.049602	0.0162624	0.0162054	0.0149236	0.018151	0.0164955			0.9	0.213334	0.210702	0.146642	0.141477	0.130448	0.123953	0.11378		0.0251643	0.049602	0.0162624	0.0162054	0.0149236	0.018151	0.0164955
		0.91	0.204726	0.202123	0.138766	0.133659	0.122751	0.116327	0.106266		0.0238527	0.0480218	0.0150486	0.0149923	0.0137245	0.0169164	0.0152792			0.91	0.204726	0.202123	0.138766	0.133659	0.122751	0.116327	0.106266		0.0238527	0.0480218	0.0150486	0.0149923	0.0137245	0.0169164	0.0152792
		0.92	0.196305	0.193731	0.131062	0.126011	0.115221	0.108867	0.0989151		0.0225696	0.046476	0.0138612	0.0138054	0.0125514	0.0157087	0.0140892			0.92	0.196305	0.193731	0.131062	0.126011	0.115221	0.108867	0.0989151		0.0225696	0.046476	0.0138612	0.0138054	0.0125514	0.0157087	0.0140892
		0.93	0.188065	0.185518	0.123524	0.118527	0.107853	0.101567	0.0917224		0.0213141	0.0449634	0.0126993	0.0126442	0.0114036	0.0145269	0.0129249			0.93	0.188065	0.185518	0.123524	0.118527	0.107853	0.101567	0.0917224		0.0213141	0.0449634	0.0126993	0.0126442	0.0114036	0.0145269	0.0129249
		0.94	0.180001	0.177481	0.116146	0.111202	0.100642	0.0944228	0.0846828		0.0200852	0.043483	0.0115621	0.0115076	0.0102802	0.0133703	0.0117853			0.94	0.180001	0.177481	0.116146	0.111202	0.100642	0.0944228	0.0846828		0.0200852	0.043483	0.0115621	0.0115076	0.0102802	0.0133703	0.0117853
		0.95	0.172106	0.169613	0.108924	0.104031	0.0935822	0.0874289	0.0777914		0.0188823	0.0420338	0.0104489	0.0103949	0.00918052	0.0122381	0.0106698			0.95	0.172106	0.169613	0.108924	0.104031	0.0935822	0.0874289	0.0777914		0.0188823	0.0420338	0.0104489	0.0103949	0.00918052	0.0122381	0.0106698
		0.96	0.164376	0.161908	0.101851	0.0970101	0.0866699	0.0805807	0.0710436		0.0177044	0.0406147	0.00935888	0.00930546	0.0081037	0.0111294	0.00957743			0.96	0.164376	0.161908	0.101851	0.0970101	0.0866699	0.0805807	0.0710436		0.0177044	0.0406147	0.00935888	0.00930546	0.0081037	0.0111294	0.00957743
		0.97	0.156805	0.154363	0.0949251	0.0901337	0.0799001	0.0738737	0.0644349		0.0165508	0.039225	0.00829132	0.00823845	0.00704908	0.0100436	0.00850762			0.97	0.156805	0.154363	0.0949251	0.0901337	0.0799001	0.0738737	0.0644349		0.0165508	0.039225	0.00829132	0.00823845	0.00704908	0.0100436	0.00850762
		En. Dens.	NaNMC	NaMVP	NaMMO	NaNMMT	NaPBA	LiNMC	LiFP	0	NaNMC	NaMVP	NaMMO	NaNMMT	NaPBA	LiNMC	LiFP			En. Dens.	NaNMC	NaMVP	NaMMO	NaNMMT	NaPBA	LiNMC	LiFP		NaNMC	NaMVP	NaMMO	NaNMMT	NaPBA	LiNMC	LiFP
		Wh/kg	GWP kgCO2 eq /kWh								ADP gSb eq./kWh									Wh/kg	GWP kgCO2 eq /kWh								ADP gSb eq./kWh
		100	74.6344	124.001	72.2504	64.0535	91.7565	74.6127	84.9801	0	10.8485	5.96498	2.2824	5.09948	2.64655	4.63632	11.4955			100	74.6344	124.001	72.2504	64.0535	91.7565	74.6127	84.9801		10.8485	5.96498	2.2824	5.09948	2.64655	4.63632	11.4955
		110	67.8495	112.728	65.6821	58.2305	83.415	67.8297	77.2547	0	9.86226	5.42271	2.07491	4.63589	2.40596	4.21484	10.4504			110	67.8495	112.728	65.6821	58.2305	83.415	67.8297	77.2547		9.86226	5.42271	2.07491	4.63589	2.40596	4.21484	10.4504
		120	62.1953	103.334	60.2086	53.3779	76.4638	62.1773	70.8168	0	9.04041	4.97082	1.902	4.24957	2.20546	3.8636	9.57957			120	62.1953	103.334	60.2086	53.3779	76.4638	62.1773	70.8168		9.04041	4.97082	1.902	4.24957	2.20546	3.8636	9.57957
		130	57.4111	95.3854	55.5772	49.2719	70.582	57.3944	65.3693	0	8.34499	4.58845	1.75569	3.92268	2.03581	3.5664	8.84268			130	57.4111	95.3854	55.5772	49.2719	70.582	57.3944	65.3693		8.34499	4.58845	1.75569	3.92268	2.03581	3.5664	8.84268
		140	53.3103	88.5722	51.6074	45.7525	65.5404	53.2948	60.7001	0	7.74892	4.2607	1.63029	3.64249	1.8904	3.31166	8.21106			140	53.3103	88.5722	51.6074	45.7525	65.5404	53.2948	60.7001		7.74892	4.2607	1.63029	3.64249	1.8904	3.31166	8.21106
		150	49.7563	82.6674	48.1669	42.7023	61.171	49.7418	56.6534	0	7.23233	3.97665	1.5216	3.39965	1.76437	3.09088	7.66366			150	49.7563	82.6674	48.1669	42.7023	61.171	49.7418	56.6534		7.23233	3.97665	1.5216	3.39965	1.76437	3.09088	7.66366
		160	46.6465	77.5007	45.1565	40.0334	57.3478	46.6329	53.1126	0	6.78031	3.72811	1.4265	3.18718	1.6541	2.8977	7.18468			160	46.6465	77.5007	45.1565	40.0334	57.3478	46.6329	53.1126		6.78031	3.72811	1.4265	3.18718	1.6541	2.8977	7.18468
		170	43.9026	72.9418	42.5002	37.6785	53.9744	43.8898	49.9883	0	6.38146	3.50881	1.34259	2.9997	1.5568	2.72725	6.76205			170	43.9026	72.9418	42.5002	37.6785	53.9744	43.8898	49.9883		6.38146	3.50881	1.34259	2.9997	1.5568	2.72725	6.76205				d
		180	41.4636	68.8895	40.1391	35.5853	50.9759	41.4515	47.2112	0	6.02694	3.31388	1.268	2.83305	1.47031	2.57574	6.38638			180	41.4636	68.8895	40.1391	35.5853	50.9759	41.4515	47.2112		6.02694	3.31388	1.268	2.83305	1.47031	2.57574	6.38638
		190	39.2813	65.2637	38.0265	33.7124	48.2929	39.2698	44.7264	0	5.70973	3.13946	1.20126	2.68394	1.39292	2.44017	6.05026			190	39.2813	65.2637	38.0265	33.7124	48.2929	39.2698	44.7264		5.70973	3.13946	1.20126	2.68394	1.39292	2.44017	6.05026
		200	37.3172	62.0005	36.1252	32.0268	45.8783	37.3064	42.4901	0	5.42424	2.98249	1.1412	2.54974	1.32328	2.31816	5.74774			200	37.3172	62.0005	36.1252	32.0268	45.8783	37.3064	42.4901		5.42424	2.98249	1.1412	2.54974	1.32328	2.31816	5.74774
		210	35.5402	59.0481	34.4049	30.5017	43.6936	35.5299	40.4667	0	5.16595	2.84047	1.08686	2.42832	1.26026	2.20777	5.47404			210	35.5402	59.0481	34.4049	30.5017	43.6936	35.5299	40.4667		5.16595	2.84047	1.08686	2.42832	1.26026	2.20777	5.47404
		220	33.9247	56.3641	32.8411	29.1152	41.7075	33.9149	38.6273	0	4.93113	2.71135	1.03746	2.31795	1.20298	2.10742	5.22522			220	33.9247	56.3641	32.8411	29.1152	41.7075	33.9149	38.6273		4.93113	2.71135	1.03746	2.31795	1.20298	2.10742	5.22522
		230	32.4497	53.9135	31.4132	27.8494	39.8942	32.4403	36.9479	0	4.71673	2.59347	0.992349	2.21717	1.15068	2.01579	4.99804			230	32.4497	53.9135	31.4132	27.8494	39.8942	32.4403	36.9479		4.71673	2.59347	0.992349	2.21717	1.15068	2.01579	4.99804
		240	31.0977	51.6671	30.1043	26.689	38.2319	31.0886	35.4084	0	4.5202	2.48541	0.951001	2.12478	1.10273	1.9318	4.78979			240	31.0977	51.6671	30.1043	26.689	38.2319	31.0886	35.4084		4.5202	2.48541	0.951001	2.12478	1.10273	1.9318	4.78979
		250	29.8538	49.6004	28.9001	25.6214	36.7026	29.8451	33.9921	0	4.3394	2.38599	0.912961	2.03979	1.05862	1.85453	4.59819			250	29.8538	49.6004	28.9001	25.6214	36.7026	29.8451	33.9921		4.3394	2.38599	0.912961	2.03979	1.05862	1.85453	4.59819
		260	28.7055	47.6927	27.7886	24.636	35.291	28.6972	32.6847	0	4.1725	2.29422	0.877847	1.96134	1.01791	1.7832	4.42134			260	28.7055	47.6927	27.7886	24.636	35.291	28.6972	32.6847		4.1725	2.29422	0.877847	1.96134	1.01791	1.7832	4.42134
		270	27.6424	45.9263	26.7594	23.7235	33.9839	27.6343	31.4741	0	4.01796	2.20925	0.845334	1.8887	0.980205	1.71716	4.25759			270	27.6424	45.9263	26.7594	23.7235	33.9839	27.6343	31.4741		4.01796	2.20925	0.845334	1.8887	0.980205	1.71716	4.25759
		280	26.6551	44.2861	25.8037	22.8763	32.7702	26.6474	30.35	0	3.87446	2.13035	0.815144	1.82124	0.945198	1.65583	4.10553			280	26.6551	44.2861	25.8037	22.8763	32.7702	26.6474	30.35		3.87446	2.13035	0.815144	1.82124	0.945198	1.65583	4.10553
		Wh/kg	AP mmolc H+ eq /kWh								HTP mCTUh/kWh									Wh/kg	AP mmolc H+ eq /kWh								HTP mCTUh/kWh
		100	507.64	976.236	324.895	333.528	361.877	409.542	432.705		49.7427	259.254	22.6055	24.4965	24.0347	51.9191	51.7182			100	507.64	976.236	324.895	333.528	361.877	409.542	432.705		49.7427	259.254	22.6055	24.4965	24.0347	51.9191	51.7182
		110	461.491	887.488	295.359	303.207	328.979	372.311	393.368		45.2207	235.685	20.5504	22.2695	21.8497	47.1992	47.0165			110	461.491	887.488	295.359	303.207	328.979	372.311	393.368		45.2207	235.685	20.5504	22.2695	21.8497	47.1992	47.0165
		120	423.034	813.53	270.746	277.94	301.564	341.285	360.588		41.4523	216.045	18.8379	20.4137	20.0289	43.2659	43.0985			120	423.034	813.53	270.746	277.94	301.564	341.285	360.588		41.4523	216.045	18.8379	20.4137	20.0289	43.2659	43.0985
		130	390.493	750.951	249.919	256.56	278.367	315.032	332.85		38.2636	199.426	17.3888	18.8434	18.4882	39.9378	39.7832			130	390.493	750.951	249.919	256.56	278.367	315.032	332.85		38.2636	199.426	17.3888	18.8434	18.4882	39.9378	39.7832
		140	362.6	697.312	232.068	238.234	258.484	292.53	309.075		35.5305	185.181	16.1468	17.4975	17.1677	37.0851	36.9415			140	362.6	697.312	232.068	238.234	258.484	292.53	309.075		35.5305	185.181	16.1468	17.4975	17.1677	37.0851	36.9415
		150	338.427	650.824	216.597	222.352	241.252	273.028	288.47		33.1618	172.836	15.0703	16.331	16.0231	34.6127	34.4788			150	338.427	650.824	216.597	222.352	241.252	273.028	288.47		33.1618	172.836	15.0703	16.331	16.0231	34.6127	34.4788
		160	317.275	610.148	203.059	208.455	226.173	255.964	270.441		31.0892	162.034	14.1284	15.3103	15.0217	32.4494	32.3239			160	317.275	610.148	203.059	208.455	226.173	255.964	270.441		31.0892	162.034	14.1284	15.3103	15.0217	32.4494	32.3239
		170	298.612	574.257	191.115	196.193	212.869	240.907	254.532		29.2604	152.502	13.2973	14.4097	14.1381	30.5406	30.4225			170	298.612	574.257	191.115	196.193	212.869	240.907	254.532		29.2604	152.502	13.2973	14.4097	14.1381	30.5406	30.4225
		180	282.022	542.353	180.497	185.293	201.043	227.523	240.392		27.6349	144.03	12.5586	13.6091	13.3526	28.8439	28.7323			180	282.022	542.353	180.497	185.293	201.043	227.523	240.392		27.6349	144.03	12.5586	13.6091	13.3526	28.8439	28.7323
		190	267.179	513.809	170.997	175.541	190.462	215.548	227.74		26.1804	136.449	11.8976	12.8929	12.6499	27.3258	27.2201			190	267.179	513.809	170.997	175.541	190.462	215.548	227.74		26.1804	136.449	11.8976	12.8929	12.6499	27.3258	27.2201
		200	253.82	488.118	162.448	166.764	180.939	204.771	216.353		24.8714	129.627	11.3027	12.2482	12.0174	25.9595	25.8591			200	253.82	488.118	162.448	166.764	180.939	204.771	216.353		24.8714	129.627	11.3027	12.2482	12.0174	25.9595	25.8591
		210	241.734	464.874	154.712	158.823	172.323	195.02	206.05		23.687	123.454	10.7645	11.665	11.4451	24.7234	24.6277			210	241.734	464.874	154.712	158.823	172.323	195.02	206.05		23.687	123.454	10.7645	11.665	11.4451	24.7234	24.6277
		220	230.746	443.744	147.68	151.604	164.49	186.155	196.684		22.6103	117.843	10.2752	11.1348	10.9249	23.5996	23.5083			220	230.746	443.744	147.68	151.604	164.49	186.155	196.684		22.6103	117.843	10.2752	11.1348	10.9249	23.5996	23.5083
		230	220.713	424.451	141.259	145.012	157.338	178.062	188.133		21.6273	112.719	9.82846	10.6506	10.4499	22.5735	22.4862			230	220.713	424.451	141.259	145.012	157.338	178.062	188.133		21.6273	112.719	9.82846	10.6506	10.4499	22.5735	22.4862
		240	211.517	406.765	135.373	138.97	150.782	170.642	180.294		20.7261	108.022	9.41894	10.2069	10.0145	21.633	21.5492			240	211.517	406.765	135.373	138.97	150.782	170.642	180.294		20.7261	108.022	9.41894	10.2069	10.0145	21.633	21.5492
		250	203.056	390.495	129.958	133.411	144.751	163.817	173.082		19.8971	103.702	9.04218	9.79858	9.61389	20.7676	20.6873			250	203.056	390.495	129.958	133.411	144.751	163.817	173.082		19.8971	103.702	9.04218	9.79858	9.61389	20.7676	20.6873
		260	195.246	375.475	124.96	128.28	139.184	157.516	166.425		19.1318	99.713	8.6944	9.42171	9.24412	19.9689	19.8916			260	195.246	375.475	124.96	128.28	139.184	157.516	166.425		19.1318	99.713	8.6944	9.42171	9.24412	19.9689	19.8916
		270	188.015	361.569	120.332	123.529	134.029	151.682	160.261		18.4232	96.0199	8.37239	9.07276	8.90175	19.2293	19.1549			270	188.015	361.569	120.332	123.529	134.029	151.682	160.261		18.4232	96.0199	8.37239	9.07276	8.90175	19.2293	19.1549
		280	181.3	348.656	116.034	119.117	129.242	146.265	154.538		17.7653	92.5906	8.07338	8.74873	8.58383	18.5425	18.4708			280	181.3	348.656	116.034	119.117	129.242	146.265	154.538		17.7653	92.5906	8.07338	8.74873	8.58383	18.5425	18.4708
		Over entire life cycle
		En. Dens.	NaNMC	NaMVP	NaMMO	NaNMMT	NaPBA	LiNMC622	LiFP	0	NaNMC	NaMVP	NaMMO	NaNMMT	NaPBA	LiNMC622	LiFP			En. Dens.	NaNMC	NaMVP	NaMMO	NaNMMT	NaPBA	LiNMC622	LiFP		NaNMC	NaMVP	NaMMO	NaNMMT	NaPBA	LiNMC622	LiFP
		Wh/kg	GWP gCO2 eq /kWh								ADP gSb eq./kWh									Wh/kg	GWP gCO2 eq /kWh								ADP gSb eq./kWh
		100	37.7093	34.8052	36.7699	33.5402	27.6232	37.7008	26.1139		0.00553326	0.00241814	0.00215804	0.00326803	0.00167902	0.00308553	0.00364998			100	37.7093	34.8052	36.7699	33.5402	27.6232	37.7008	26.1139		0.00553326	0.00241814	0.00215804	0.00326803	0.00167902	0.00308553	0.00364998
		110	35.0359	32.2944	34.1819	31.2458	25.7653	35.0281	24.3932		0.00514467	0.00229736	0.00207628	0.00308536	0.00162543	0.00291946	0.00341721			110	35.0359	32.2944	34.1819	31.2458	25.7653	35.0281	24.3932		0.00514467	0.00229736	0.00207628	0.00308536	0.00162543	0.00291946	0.00341721
		120	32.8081	30.202	32.0252	29.3338	24.217	32.8009	22.9592		0.00482084	0.00219671	0.00200815	0.00293314	0.00158077	0.00278107	0.00322324			120	32.8081	30.202	32.0252	29.3338	24.217	32.8009	22.9592		0.00482084	0.00219671	0.00200815	0.00293314	0.00158077	0.00278107	0.00322324
		130	30.923	28.4315	30.2004	27.716	22.9069	30.9164	21.7459		0.00454683	0.00211154	0.0019505	0.00280434	0.00154298	0.00266396	0.00305911			130	30.923	28.4315	30.2004	27.716	22.9069	30.9164	21.7459		0.00454683	0.00211154	0.0019505	0.00280434	0.00154298	0.00266396	0.00305911
		140	29.3072	26.914	28.6362	26.3292	21.784	29.301	20.7059		0.00431196	0.00203854	0.00190109	0.00269394	0.00151059	0.00256359	0.00291842			140	29.3072	26.914	28.6362	26.3292	21.784	29.301	20.7059		0.00431196	0.00203854	0.00190109	0.00269394	0.00151059	0.00256359	0.00291842
		150	27.9068	25.5988	27.2805	25.1274	20.8108	27.9011	19.8046		0.00410842	0.00197528	0.00185827	0.00259826	0.00148252	0.0024766	0.0027965			150	27.9068	25.5988	27.2805	25.1274	20.8108	27.9011	19.8046		0.00410842	0.00197528	0.00185827	0.00259826	0.00148252	0.0024766	0.0027965
		160	26.6815	24.448	26.0944	24.0758	19.9592	26.6761	19.0159		0.00393031	0.00191992	0.00182079	0.00251454	0.00145796	0.00240048	0.00268981			160	26.6815	24.448	26.0944	24.0758	19.9592	26.6761	19.0159		0.00393031	0.00191992	0.00182079	0.00251454	0.00145796	0.00240048	0.00268981
		170	25.6003	23.4326	25.0477	23.1479	19.2079	25.5953	18.32		0.00377316	0.00187107	0.00178773	0.00244067	0.00143629	0.00233332	0.00259568			170	25.6003	23.4326	25.0477	23.1479	19.2079	25.5953	18.32		0.00377316	0.00187107	0.00178773	0.00244067	0.00143629	0.00233332	0.00259568
		180	24.6393	22.53	24.1174	22.3231	18.54	24.6345	17.7015		0.00363347	0.00182765	0.00175834	0.002375	0.00141703	0.00227362	0.002512			180	24.6393	22.53	24.1174	22.3231	18.54	24.6345	17.7015		0.00363347	0.00182765	0.00175834	0.002375	0.00141703	0.00227362	0.002512
		190	23.7794	21.7224	23.285	21.5851	17.9424	23.7749	17.148		0.00350848	0.0017888	0.00173205	0.00231625	0.00139979	0.0022202	0.00243714			190	23.7794	21.7224	23.285	21.5851	17.9424	23.7749	17.148		0.00350848	0.0017888	0.00173205	0.00231625	0.00139979	0.0022202	0.00243714
		200	23.0055	20.9956	22.5358	20.921	17.4046	23.0013	16.6499		0.00339599	0.00175384	0.00170838	0.00226338	0.00138428	0.00217213	0.00236976			200	23.0055	20.9956	22.5358	20.921	17.4046	23.0013	16.6499		0.00339599	0.00175384	0.00170838	0.00226338	0.00138428	0.00217213	0.00236976
		210	22.3053	20.338	21.858	20.3201	16.918	22.3013	16.1992		0.00329422	0.00172221	0.00168697	0.00221553	0.00137024	0.00212863	0.0023088			210	22.3053	20.338	21.858	20.3201	16.918	22.3013	16.1992		0.00329422	0.00172221	0.00168697	0.00221553	0.00137024	0.00212863	0.0023088
		220	21.6688	19.7401	21.2418	19.7738	16.4756	21.6649	15.7895		0.00320169	0.00169345	0.0016675	0.00217204	0.00135748	0.00208909	0.00225337			220	21.6688	19.7401	21.2418	19.7738	16.4756	21.6649	15.7895		0.00320169	0.00169345	0.0016675	0.00217204	0.00135748	0.00208909	0.00225337
		230	21.0876	19.1943	20.6792	19.275	16.0717	21.0839	15.4155		0.00311722	0.00166719	0.00164973	0.00213233	0.00134583	0.00205299	0.00220277			230	21.0876	19.1943	20.6792	19.275	16.0717	21.0839	15.4155		0.00311722	0.00166719	0.00164973	0.00213233	0.00134583	0.00205299	0.00220277
		240	20.5549	18.6939	20.1635	18.8178	15.7015	20.5513	15.0726		0.00303978	0.00164312	0.00163344	0.00209593	0.00133515	0.00201989	0.00215639			240	20.5549	18.6939	20.1635	18.8178	15.7015	20.5513	15.0726		0.00303978	0.00164312	0.00163344	0.00209593	0.00133515	0.00201989	0.00215639
		250	20.0648	18.2336	19.689	18.3971	15.3608	20.0613	14.7571		0.00296854	0.00162098	0.00161845	0.00206244	0.00132533	0.00198945	0.00211371			250	20.0648	18.2336	19.689	18.3971	15.3608	20.0613	14.7571		0.00296854	0.00162098	0.00161845	0.00206244	0.00132533	0.00198945	0.00211371
		260	19.6123	17.8087	19.2511	18.0088	15.0464	19.6091	14.4659		0.00290278	0.00160054	0.00160461	0.00203153	0.00131626	0.00196134	0.00207432			260	19.6123	17.8087	19.2511	18.0088	15.0464	19.6091	14.4659		0.00290278	0.00160054	0.00160461	0.00203153	0.00131626	0.00196134	0.00207432
		270	19.1934	17.4153	18.8455	17.6493	14.7553	19.1903	14.1963		0.00284188	0.00158161	0.0015918	0.00200291	0.00130786	0.00193532	0.00203785			270	19.1934	17.4153	18.8455	17.6493	14.7553	19.1903	14.1963		0.00284188	0.00158161	0.0015918	0.00200291	0.00130786	0.00193532	0.00203785
		280	18.8044	17.0499	18.469	17.3155	14.485	18.8014	13.9459		0.00278534	0.00156404	0.00157991	0.00197633	0.00130007	0.00191115	0.00200398			280	18.8044	17.0499	18.469	17.3155	14.485	18.8014	13.9459		0.00278534	0.00156404	0.00157991	0.00197633	0.00130007	0.00191115	0.00200398
		Wh/kg	AP mmolc H+ eq /kWh								HTP mCTUh/kWh									Wh/kg	AP mmolc H+ eq /kWh								HTP mCTUh/kWh
		100	0.249587	0.260344	0.177581	0.180982	0.123506	0.210934	0.139281		0.0277905	0.0648346	0.0170978	0.0178429	0.0124432	0.0286481	0.0186093			100	0.249587	0.260344	0.177581	0.180982	0.123506	0.210934	0.139281		0.0277905	0.0648346	0.0170978	0.0178429	0.0124432	0.0286481	0.0186093
		110	0.231403	0.240577	0.165943	0.169035	0.116178	0.196264	0.13052		0.0260087	0.0595851	0.0162881	0.0169655	0.0119566	0.0267883	0.0175621			110	0.231403	0.240577	0.165943	0.169035	0.116178	0.196264	0.13052		0.0260087	0.0595851	0.0162881	0.0169655	0.0119566	0.0267883	0.0175621
		120	0.21625	0.224104	0.156245	0.15908	0.110072	0.184039	0.123218		0.0245239	0.0552105	0.0156133	0.0162342	0.011551	0.0252385	0.0166894			120	0.21625	0.224104	0.156245	0.15908	0.110072	0.184039	0.123218		0.0245239	0.0552105	0.0156133	0.0162342	0.011551	0.0252385	0.0166894
		130	0.203428	0.210166	0.148039	0.150655	0.104905	0.173695	0.11704		0.0232675	0.0515089	0.0150424	0.0156155	0.0112079	0.0239271	0.015951			130	0.203428	0.210166	0.148039	0.150655	0.104905	0.173695	0.11704		0.0232675	0.0515089	0.0150424	0.0156155	0.0112079	0.0239271	0.015951
		140	0.192438	0.198218	0.141005	0.143435	0.100476	0.164828	0.111745		0.0221906	0.0483361	0.014553	0.0150852	0.0109137	0.0228031	0.015318			140	0.192438	0.198218	0.141005	0.143435	0.100476	0.164828	0.111745		0.0221906	0.0483361	0.014553	0.0150852	0.0109137	0.0228031	0.015318
		150	0.182913	0.187864	0.134909	0.137177	0.0966382	0.157144	0.107155		0.0212573	0.0455864	0.0141288	0.0146256	0.0106588	0.021829	0.0147695			150	0.182913	0.187864	0.134909	0.137177	0.0966382	0.157144	0.107155		0.0212573	0.0455864	0.0141288	0.0146256	0.0106588	0.021829	0.0147695
		160	0.174579	0.178804	0.129575	0.131701	0.0932798	0.15042	0.10314		0.0204406	0.0431803	0.0137577	0.0142234	0.0104357	0.0209766	0.0142895			160	0.174579	0.178804	0.129575	0.131701	0.0932798	0.15042	0.10314		0.0204406	0.0431803	0.0137577	0.0142234	0.0104357	0.0209766	0.0142895
		170	0.167225	0.17081	0.124869	0.126869	0.0903164	0.144488	0.0995963		0.01972	0.0410574	0.0134302	0.0138685	0.0102389	0.0202245	0.013866			170	0.167225	0.17081	0.124869	0.126869	0.0903164	0.144488	0.0995963		0.01972	0.0410574	0.0134302	0.0138685	0.0102389	0.0202245	0.013866
		180	0.160688	0.163704	0.120685	0.122575	0.0876824	0.139214	0.0964467		0.0190795	0.0391703	0.0131392	0.0135531	0.010064	0.0195559	0.0134896			180	0.160688	0.163704	0.120685	0.122575	0.0876824	0.139214	0.0964467		0.0190795	0.0391703	0.0131392	0.0135531	0.010064	0.0195559	0.0134896
		190	0.15484	0.157346	0.116942	0.118732	0.0853256	0.134496	0.0936286		0.0185064	0.0374818	0.0128787	0.0132709	0.00990744	0.0189578	0.0131527			190	0.15484	0.157346	0.116942	0.118732	0.0853256	0.134496	0.0936286		0.0185064	0.0374818	0.0128787	0.0132709	0.00990744	0.0189578	0.0131527
		200	0.149576	0.151624	0.113573	0.115274	0.0832045	0.130249	0.0910923		0.0179907	0.0359622	0.0126443	0.0130169	0.00976656	0.0184194	0.0128496			200	0.149576	0.151624	0.113573	0.115274	0.0832045	0.130249	0.0910923		0.0179907	0.0359622	0.0126443	0.0130169	0.00976656	0.0184194	0.0128496
		210	0.144813	0.146447	0.110525	0.112145	0.0812853	0.126407	0.0887976		0.017524	0.0345874	0.0124322	0.0127871	0.0096391	0.0179323	0.0125753			210	0.144813	0.146447	0.110525	0.112145	0.0812853	0.126407	0.0887976		0.017524	0.0345874	0.0124322	0.0127871	0.0096391	0.0179323	0.0125753
		220	0.140484	0.14174	0.107754	0.1093	0.0795407	0.122914	0.0867115		0.0170998	0.0333375	0.0122395	0.0125781	0.00952323	0.0174896	0.012326			220	0.140484	0.14174	0.107754	0.1093	0.0795407	0.122914	0.0867115		0.0170998	0.0333375	0.0122395	0.0125781	0.00952323	0.0174896	0.012326
		230	0.136531	0.137443	0.105224	0.106703	0.0779478	0.119725	0.0848068		0.0167124	0.0321963	0.0120634	0.0123874	0.00941743	0.0170853	0.0120983			230	0.136531	0.137443	0.105224	0.106703	0.0779478	0.119725	0.0848068		0.0167124	0.0321963	0.0120634	0.0123874	0.00941743	0.0170853	0.0120983
		240	0.132907	0.133504	0.102905	0.104322	0.0764876	0.116802	0.0830608		0.0163573	0.0311502	0.0119021	0.0122125	0.00932045	0.0167147	0.0118896			240	0.132907	0.133504	0.102905	0.104322	0.0764876	0.116802	0.0830608		0.0163573	0.0311502	0.0119021	0.0122125	0.00932045	0.0167147	0.0118896
		250	0.129574	0.12988	0.100772	0.102132	0.0751442	0.114113	0.0814545		0.0160307	0.0301878	0.0117536	0.0120517	0.00923123	0.0163737	0.0116976			250	0.129574	0.12988	0.100772	0.102132	0.0751442	0.114113	0.0814545		0.0160307	0.0301878	0.0117536	0.0120517	0.00923123	0.0163737	0.0116976
		260	0.126497	0.126534	0.098802	0.10011	0.0739042	0.11163	0.0799718		0.0157292	0.0292994	0.0116166	0.0119032	0.00914887	0.016059	0.0115204			260	0.126497	0.126534	0.098802	0.10011	0.0739042	0.11163	0.0799718		0.0157292	0.0292994	0.0116166	0.0119032	0.00914887	0.016059	0.0115204
		270	0.123647	0.123437	0.0969784	0.0982383	0.072756	0.109331	0.0785989		0.01545	0.0284768	0.0114897	0.0117657	0.00907261	0.0157676	0.0113563			270	0.123647	0.123437	0.0969784	0.0982383	0.072756	0.109331	0.0785989		0.01545	0.0284768	0.0114897	0.0117657	0.00907261	0.0157676	0.0113563
		280	0.121001	0.120561	0.0952851	0.0964999	0.0716898	0.107197	0.077324		0.0151907	0.027713	0.0113719	0.011638	0.0090018	0.015497	0.011204			280	0.121001	0.120561	0.0952851	0.0964999	0.0716898	0.107197	0.077324		0.0151907	0.027713	0.0113719	0.011638	0.0090018	0.015497	0.011204
[truncated: 4 more columns]

## Sheet: Graphs
		Electricity from PV								Electricity from Grid
	AP	NaNMC	NaMVP	NaMMO	NaNMMT	NaPBA	LiNMC	LiFP		NaNMC	NaMVP	NaMMO	NaNMMT	NaPBA	LiNMC	LiFP
	Production	0.0402028	0.0683771	0.022328	0.0209439	0.0311402	0.016247	0.0234065		0.0402028	0.0683771	0.022328	0.0209439	0.0311402	0.016247	0.0234065
	Use	0.0495652	0.0429032	0.0495652	0.0495652	0.0429032	0.0495652	0.0429032		0.193043	0.167097	0.193043	0.193043	0.167097	0.193043	0.167097
	Replacement	0.106537	0.074238	0.0591692	0.0555014	0.0338094	0.0430546	0.0254127		0.106537	0.074238	0.0591692	0.0555014	0.0338094	0.0430546	0.0254127
	Total	0.196305	0.185518	0.131062	0.126011	0.107853	0.108867	0.0917224		0.339784	0.309712	0.274541	0.269489	0.232046	0.252345	0.215916
	W+	0.44022	0.855691	0.244491	0.229336	0.389698	0.177905	0.292915		0.44022	0.855691	0.244491	0.229336	0.389698	0.177905	0.0878746
	W-	0.0395003	0.0311554	0.0361372	0.0358768	0.0279527	0.0349931	0.0272875		0.124384	0.098437	0.124384	0.124384	0.098437	0.124384	0.098437
	GWP	NaNMC	NaMVP	NaMMO	NaNMMT	NaPBA	LiNMC	LiFP		NaNMC	NaMVP	NaMMO	NaNMMT	NaPBA	LiNMC	LiFP
	Production	0.0059107	0.00868523	0.00496531	0.00402225	0.00789582	0.00295997	0.00459686		0.0059107	0.00868523	0.00496531	0.00402225	0.00789582	0.00295997	0.00459686
	Use	0.00830174	0.00718591	0.00830174	0.00830174	0.00718591	0.00830174	0.00718591		0.0374791	0.0324416	0.0374791	0.0374791	0.0324416	0.0374791	0.0324416
	Replacement	0.0156633	0.00942968	0.0131581	0.010659	0.00857261	0.00784393	0.00499088		0.0156633	0.00942968	0.0131581	0.010659	0.00857261	0.00784393	0.00499088
	Total	0.0298758	0.0253008	0.0264251	0.0229829	0.0236543	0.0191056	0.0167737		0.0590532	0.0505565	0.0556025	0.0521603	0.04891	0.048283	0.0420293
	W+	0.0647221	0.108689	0.0543701	0.0440436	0.0988106	0.0324117	0.0575264		0.0647221	0.160718	0.0945544	0.0929448	0.0988106	0.0796784	0.0754496
	W-	0.00975265	0.00498024	0.00819276	0.00663671	0.00491234	0.00590596	0.0046286		0.0241489	0.0191114	0.0241489	0.0241489	0.0191114	0.0241489	0.0191114
	mHtox per kWh	NaNMC	NaMVP	NaMMO	NaNMMT	NaPBA	LiNMC	LiFP		NaNMC	NaMVP	NaMMO	NaNMMT	NaPBA	LiNMC	LiFP
	Production	0.00393939	0.0181585	0.00155353	0.00153826	0.00206823	0.00205969	0.00279761		0.00393939	0.0181585	0.00155353	0.00153826	0.00206823	0.00205969	0.00279761
	Use	0.0081908	0.00708989	0.0081908	0.0081908	0.00708989	0.0081908	0.00708989		0.0151557	0.0131187	0.0151557	0.0151557	0.0131187	0.0151557	0.0131187
	Replacement	0.0104394	0.019715	0.00411685	0.00407638	0.00224551	0.00545818	0.0030374		0.0104394	0.019715	0.00411685	0.00407638	0.00224551	0.00545818	0.0030374
	Total	0.0225696	0.0449634	0.0138612	0.0138054	0.0114036	0.0157087	0.0129249		0.0295345	0.0509922	0.0208261	0.0207704	0.0174324	0.0226736	0.0189537
	W+	0.0431363	0.227241	0.0170112	0.0168439	0.0258825	0.0225536	0.0350101		0.0431363	0.227241	0.0170112	0.0168439	0.0258825	0.0225536	0.010503
	W-	0.0065	0.00573846	0.00556987	0.00556699	0.00435455	0.0056651	0.00441728		0.0097653	0.00772824	0.0097653	0.0097653	0.00772824	0.0097653	0.00772824
	RDP per kWh	NaNMC	NaMVP	NaMMO	NaNMMT	NaPBA	LiNMC	LiFP		NaNMC	NaMVP	NaMMO	NaNMMT	NaPBA	LiNMC	LiFP
	Production	0.00085915	0.000417797	0.000156855	0.000320223	0.000227741	0.000183928	0.000621829		0.00085915	0.000417797	0.000156855	0.000320223	0.000227741	0.000183928	0.000621829
	Use	0.00125872	0.00108954	0.00125872	0.00125872	0.00108954	0.00125872	0.00108954		0.00028271	0.000244711	0.00028271	0.00028271	0.000244711	0.00028271	0.000244711
	Replacement	0.00227675	0.000453608	0.000415666	0.00084859	0.000247262	0.00048741	0.000675129		0.00227675	0.000453608	0.000415666	0.00084859	0.000247262	0.00048741	0.000675129
	Total	0.00439462	0.00196094	0.00183124	0.00242753	0.00156454	0.00193006	0.0023865		0.00341861	0.00111612	0.000855231	0.00145152	0.000719713	0.000954048	0.00154167
	W+	0.00940769	0.00522843	0.00171756	0.00350644	0.00285001	0.00201402	0.00778175		0.00940769	0.00522843	0.00171756	0.00350644	0.00285001	0.00201402	0.00233452
	W-	0.0014176	0.000677783	0.000840543	0.00087128	0.000661437	0.000845637	0.000695332		0.0014176	0.00014416	0.000258811	0.000528367	0.00014416	0.000303482	0.00014416
	w/o recycling		(paste values from above calculated without recycling here)
		Electricity from PV								Electricity from Grid
	AP	NaNMC	NaMVP	NaMMO	NaNMMT	NaPBA	LiNMC622	LiFP		NaNMC	NaMVP	NaMMO	NaNMMT	NaPBA	LiNMC622	LiFP
	Constr.	0.106903	0.0913357	0.0538218	0.0571904	0.0612154	0.0486661	0.0358295		0.106903	0.0913357	0.0538218	0.0571904	0.0612154	0.0486661	0.0358295
	El. Cons	0.0495652	0.0429032	0.0495652	0.0495652	0.0429032	0.0495652	0.0429032		0.193043	0.167097	0.193043	0.193043	0.167097	0.193043	0.167097
	Batt exchange	0.283292	0.0991645	0.142628	0.151555	0.0664625	0.128965	0.0389006		0.283292	0.0991645	0.142628	0.151555	0.0664625	0.128965	0.0389006
	Total	0.43976	0.233403	0.246015	0.25831	0.170581	0.227197	0.117633		0.583239	0.357597	0.389493	0.401788	0.294775	0.370675	0.241827
	W+	1.17059	1.143	0.589348	0.626235	0.766067	0.532894	0.448381		1.17059	1.143	0.589348	0.626235	0.766067	0.532894	0.134514
	W-	0.078039	0.03313	0.0420626	0.0426964	0.0305394	0.0410926	0.028356		0.17639	0.098437	0.124384	0.124384	0.098437	0.124384	0.098437
	GWP	NaNMC	NaMVP	NaMMO	NaNMMT	NaPBA	LiNMC622	LiFP		NaNMC	NaMVP	NaMMO	NaNMMT	NaPBA	LiNMC622	LiFP
	Constr.	0.00935427	0.00957391	0.00564966	0.00546224	0.00929581	0.00483669	0.00529567		0.00935427	0.00957391	0.00564966	0.00546224	0.00929581	0.00483669	0.00529567
	El. Cons	0.00830174	0.00718591	0.00830174	0.00830174	0.00718591	0.00830174	0.00718591		0.0374791	0.0324416	0.0374791	0.0374791	0.0324416	0.0374791	0.0324416
	Batt exchange	0.0247888	0.0103945	0.0149716	0.0144749	0.0100926	0.0128172	0.00574958		0.0247888	0.0103945	0.0149716	0.0144749	0.0100926	0.0128172	0.00574958
	Total	0.0424448	0.0271544	0.028923	0.0282389	0.0265743	0.0259557	0.0182312		0.0716222	0.0524101	0.0581004	0.0574163	0.05183	0.0551331	0.0434869
	W+	0.345266	0.173119	0.175029	0.187375	0.11633	0.160148	0.0710462		0.102429	0.20675	0.207009	0.219988	0.144508	0.191158	0.0999031
	W-	0.00710901	0.00505667	0.00641201	0.00637675	0.00503276	0.00625905	0.00468871		0.0241489	0.0191114	0.0241489	0.0241489	0.0191114	0.0241489	0.0191114
	mHtox per kWh	NaNMC	NaMVP	NaMMO	NaNMMT	NaPBA	LiNMC622	LiFP		NaNMC	NaMVP	NaMMO	NaNMMT	NaPBA	LiNMC622	LiFP
	Constr.	0.0125119	0.0186126	0.00187517	0.00317986	0.0028972	0.0112323	0.0106636		0.0125119	0.0186126	0.00187517	0.00317986	0.0028972	0.0112323	0.0106636
	El. Cons	0.0081908	0.00708989	0.0081908	0.0081908	0.00708989	0.0081908	0.00708989		0.0151557	0.0131187	0.0151557	0.0151557	0.0131187	0.0151557	0.0131187
	Batt exchange	0.0331566	0.0202079	0.00496919	0.00842662	0.00314553	0.0297656	0.0115776		0.0331566	0.0202079	0.00496919	0.00842662	0.00314553	0.0297656	0.0115776
	Total	0.0538593	0.0459104	0.0150352	0.0197973	0.0131326	0.0491887	0.0293311		0.0608243	0.0519392	0.0220001	0.0267622	0.0191614	0.0561536	0.0353599
	W+	0.137006	0.232923	0.0205331	0.0348194	0.0362564	0.122994	0.133447		0.137006	0.232923	0.0205331	0.0348194	0.0362564	0.122994	0.0400342
	W-	0.0091337	0.00577751	0.00563038	0.00587585	0.00442585	0.00819958	0.00509383		0.0206447	0.00772824	0.0097653	0.0097653	0.00772824	0.0185333	0.00772824
	RDP per kWh	NaNMC	NaMVP	NaMMO	NaNMMT	NaPBA	LiNMC622	LiFP		NaNMC	NaMVP	NaMMO	NaNMMT	NaPBA	LiNMC622	LiFP
	Constr.	0.00390709	0.000835593	0.000572862	0.000981107	0.000857378	0.00342652	0.00328488		0.00390709	0.000835593	0.000572862	0.000981107	0.000857378	0.00342652	0.00328488
	El. Cons	0.00125872	0.00108954	0.00125872	0.00125872	0.00108954	0.00125872	0.00108954		0.00028271	0.000244711	0.00028271	0.00028271	0.000244711	0.00028271	0.000244711
	Batt exchange	0.0103538	0.000907215	0.00151808	0.00259993	0.000930867	0.00908028	0.00356644		0.0103538	0.000907215	0.00151808	0.00259993	0.000930867	0.00908028	0.00356644
	Total	0.0155196	0.00283235	0.00334967	0.00483976	0.00287778	0.0137655	0.00794086		0.0145436	0.00198752	0.00237366	0.00386375	0.00203296	0.0127895	0.00709603
	W+	0.0427826	0.0104569	0.00627284	0.0107431	0.0107295	0.0375204	0.0411079		0.0427826	0.0104569	0.00627284	0.0107431	0.0107295	0.0375204	0.0123324
	W-	0.00285217	0.000713717	0.000918813	0.000995622	0.000715591	0.00250136	0.000924378		0.00644669	0.00014416	0.000945223	0.00161883	0.00014416	0.00565376	0.000281561

## Sheet: Whisker_Sens
	AP			Cycles				Efficieny
		Technology	Help line	Min	Max			Min	Max
		#REF!	0	0.166957	0.636525			0.156805	0.213334
		#REF!	2	0.242564	1.04121			0.154363	0.210702
		#REF!	4	0.114763	0.375554			0.0949251	0.146642
		#REF!	6	0.110721	0.355346			0.0901337	0.141477
		#REF!	8	0.133833	0.49755			0.0799001	0.130448
		#REF!	10	0.0970065	0.286772			0.0738737	0.123953
		#REF!	12	0.11125	0.384638			0.0644349	0.11378
		#REF!	6
		I	2
		J	4
		K	6
	GWP
				Cycles				Efficieny
		Technology		Min	Max			Min	Max
		#REF!	0	25.561	94.5979			23.4147	32.6612
		#REF!	2	32.5468	133.99			20.3206	29.3265
		#REF!	4	22.8004	80.7953			20.1419	29.1339
		#REF!	6	20.0467	67.0266			16.8771	25.6152
		#REF!	8	30.2417	122.465			18.742	27.6252
		#REF!	10	16.9449	51.5174			13.1997	21.6518
		#REF!	12	20.6087	74.3001			12.145	20.5151
		#REF!	6
		I	2
		J	4
		K	6
	HTx
				Cycles				Efficieny
		Technology		Min	Max			Min	Max
		#REF!	0	0.0196938	0.0657059			0.0165508	0.0251643
		#REF!	2	0.0601128	0.272205			0.039225	0.049602
		#REF!	4	0.0127271	0.0308723			0.00829132	0.0162624
		#REF!	6	0.0126825	0.0306494			0.00823845	0.0162054
		#REF!	8	0.0131291	0.0372861			0.00704908	0.0149236
		#REF!	10	0.0142051	0.0382623			0.0100436	0.018151
		#REF!	12	0.0152589	0.047935			0.00850762	0.0164955
		#REF!	6
		I	2
		J	4
		K	6
	ADP
				Cycles				Efficieny
		Technology		Min	Max			Min	Max
		#REF!	0	0.00376744	0.0138023			0.00342194	0.00481395
		#REF!	2	0.0023095	0.00718937			0.00128316	0.00250882
		#REF!	4	0.00171674	0.00354881			0.000990699	0.00219361
		#REF!	6	0.00219377	0.00593397			0.00155625	0.00280315
		#REF!	8	0.00175454	0.00441456			0.000903104	0.0020992
		#REF!	10	0.00179579	0.00394408			0.00108442	0.00229462
		#REF!	12	0.00290528	0.0101682			0.00169117	0.00294856
		#REF!	6
		I	2
		J	4
		K	6
